# Supplementary material for: Amelioration of non-alcoholic fatty liver disease by targeting adhesion G protein-coupled receptor F1 (Adgrf1)
Source: eLife journal article supplement (doi:10.7554/elife.85131), 2023-08-02
Supplement: fig1-data1 [file Figure 1-Source 1.xlsx]

## Sheet: Figure 1A
RAW DATA
STC mice
Liver	1	0.8	1.2	1.1	0.9	0.8	1	1.1
Kidney	0.27	0.11	0.17	0.22	0.15	0.12	0.32	0.18
Brain	0.031	0.0039	0.036	0.028	0.031	0.024	0.028	0.019
Lung	0.036513	0.042689	0.032	0.030264	0.038183	0.031	0.018	0.024
Pancreas	0.0309	0.061214	0.04863	0.051722	0.039471	0.052	0.021	0.042
Stomach	0.032804	0.083043	0.037163	0.067315	0.06731	0.073	0.048	0.064
D.Colon	0.046	0.038714	0.022956	0.031472	0.030938	0.052	0.015	0.046
Muscle	0.001482	0.010167	0.002991	0.00326	0.001917	0.0021	0.0018	0.0036
EWAT	0.018762	0.019915	0.019709	0.016246	0.012849	0.021	0.024	0.018
ANOVA TESTS
Number of families	1
Number of comparisons per family	8
Alpha	0.05
Unpaired t with Welch's correction	Mean Diff.	95.00% CI of diff.	Below threshold?	Summary	Individual P Value	A-?
Liver vs. Kidney	0.8168	0.6238 to 1.010	Yes	***	<.001	B	Kidney
Liver vs. Brain	0.9911	0.7951 to 1.187	Yes	***	<.001	C	Brain
Liver vs. Lung	0.9641	0.7678 to 1.160	Yes	***	<.001	D	Lung
Liver vs. Pancreas	0.9536	0.7576 to 1.150	Yes	***	<.001	E	Pancreas
Liver vs. Stomach	0.9425	0.7471 to 1.138	Yes	***	<.001	F	Stomach
Liver vs. D.Colon	0.966	0.7698 to 1.162	Yes	***	<.001	G	D.Colon
Liver vs. Muscle	0.996	0.7997 to 1.192	Yes	***	<.001	H	Muscle
Liver vs. EWAT	0.9825	0.7862 to 1.179	Yes	***	<.001	I	EWAT
Test details	Mean 1	Mean 2	Mean Diff.	SE of diff.	n1	n2	t	DF
Liver vs. Kidney	1	0.1832	0.8168	0.07626	5	5	10.71	5.271
Liver vs. Brain	1	0.008876	0.9911	0.07093	5	5	13.97	4.049
Liver vs. Lung	1	0.03593	0.9641	0.07075	5	5	13.63	4.008
Liver vs. Pancreas	1	0.04639	0.9536	0.0709	5	5	13.45	4.043
Liver vs. Stomach	1	0.05753	0.9425	0.07137	5	5	13.21	4.149
Liver vs. D.Colon	1	0.03402	0.966	0.07082	5	5	13.64	4.024
Liver vs. Muscle	1	0.003963	0.996	0.07073	5	5	14.08	4.004
Liver vs. EWAT	1	0.0175	0.9825	0.07072	5	5	13.89	4.003

## Sheet: Figure 1C
RAW DATA
	NPC								Hepatocyte
Adgrf1	0.087595	0.0944499	0.04035	0.03	0.04	0.03	0.04	0.06	1.07923	0.926588	1.23662	1.3	0.9	0.15	0.75	0.98
Cd11b	1.8588	3.01331	2.8	2.7183	2.5741	2.187	2.687	2.657	1.15069	0.869041	1.02	1.0295	1.0039	1.005	1.028	0.854
Albumin	0.0129582	0.028415	0.0298751	0.19304	0.021935	0.027	0.029	0.018	1.20158	0.839621	1.02385	1.0393	1.0294	1.021	1.035	0.84
Two-way ANOVA
Table Analyzed	Figure 1C
Two-way RM ANOVA	Matching: Across row
Assume sphericity?	Yes
Alpha	0.05
Source of Variation	% of total variation	P value	P value summary	Significant?
Row Factor x Time	42.88	<.001	***	Yes
Row Factor	49.52	<.001	***	Yes
Time	0.07754	0.536	ns	No
Subject	3.415	0.662	ns	No
ANOVA table	SS	DF	MS	F (DFn, DFd)	P value
Row Factor x Time	15.65	2	7.827	F (2, 21) = 109.6	P<.001
Row Factor	18.08	2	9.038	F (2, 21) = 152.3	P<.001
Time	0.0283	1	0.0283	F (1, 21) = 0.3963	P=.536
Subject	1.246	21	0.05935	F (21, 21) = 0.8311	P=.662
Residual	1.5	21	0.07142
Difference between column means
Mean of NPC	0.8863
Mean of Hepatocyte	0.9349
Difference between means	-0.04857
SE of difference	0.07715
95% CI of difference	-0.2090 to 0.1119
Data summary
Number of columns (Time)	2
Number of rows (Row Factor)	3
Number of subjects (Subject)	24
Number of missing values	0

## Sheet: Figure 1D
RAW DATA
	NPC			Hepatocyte
Adgrf1	1.00424	0.918705	1.07705	0.061167	0.045003	0.063336
Cd11b	0.02	0.002	0.005	0.794528	1.19771	0.984397
Albumin	0.910977	0.83737	1.25165	0.0002	0.0003	0.01
Two-way ANOVA
Number of families	1
Number of comparisons per family	3
Alpha	0.05
Šídák's multiple comparisons test	Mean Diff.	95.00% CI of diff.	Below threshold?	Summary	Adjusted P Value
HEPATOCYTE - NPC
Adgrf1	0.9435	0.6081 to 1.279	Yes	***	<.001
Cd11b	-0.9922	-1.328 to -0.6569	Yes	***	<.001
Albumin	1	0.6646 to 1.335	Yes	***	<.001
Test details	Mean 1	Mean 2	Mean Diff.	SE of diff.	N1	N2	t	DF
HEPATOCYTE - NPC
Adgrf1	1	0.0565	0.9435	0.1024	3	3	9.211	6
Cd11b	0	0.9922	-0.9922	0.1024	3	3	9.686	6
Albumin	1	0	1	0.1024	3	3	9.762	6

## Sheet: Figure 1E
RAW DATA
	0			2			4			6			8
STC	0.909093	1.1	1.03578	1.19127	0.839441	0.955412	1.00173	0.998269	0.89657	0.950989	1.05154	1.02872	1.12896	0.885768	0.954572
HFD	1.11535	0.728247	0.89542	1.06253	0.740977	0.845082	0.383554	0.408243	0.58423	0.182062	0.391613	0.42851	0.083911	0.085082	0.087523
Two-way ANOVA
Compare each cell mean with the other cell mean in that column
Number of families	1
Number of comparisons per family	5
Alpha	0.05
Šídák's multiple comparisons test	Mean Diff.	95.00% CI of diff.	Below threshold?	Summary	Adjusted P Value
STC - HFD
0	0.102	-0.1890 to 0.3929	No	ns	0.867
2	0.1125	-0.1785 to 0.4035	No	ns	0.814
4	0.5068	0.2159 to 0.7978	Yes	***	<.001
6	0.6764	0.3854 to 0.9673	Yes	***	<.001
8	0.9043	0.6133 to 1.195	Yes	***	<.001
Test details	Mean 1	Mean 2	Mean Diff.	SE of diff.	N1	N2	t	DF
STC - HFD
0	1.015	0.913	0.102	0.1026	3	3	0.9937	20
2	0.9954	0.8829	0.1125	0.1026	3	3	1.097	20
4	0.9655	0.4587	0.5068	0.1026	3	3	4.94	20
6	1.01	0.3341	0.6764	0.1026	3	3	6.592	20
8	0.9898	0.08551	0.9043	0.1026	3	3	8.813	20

## Sheet: Figure 1F
RAW DATA
	0			2			4			6			8
STC	0.878126	1.13879	1.21578	0.827884	1.2079	1.25721	0.715736	1.39716	1.24812	0.967612	1.03347	1.30572	1.23114	0.812252	0.972085
HFD	1.25919	2.29342	2.2457	1.83083	0.746131	1.28782	5.34244	2.48372	3.54872	8.35419	7.93098	7.68812	9.09454	10.0213	9.2572
Two-way ANOVA
Compare each cell mean with the other cell mean in that column
Number of families	1
Number of comparisons per family	5
Alpha	0.05
Uncorrected Fisher's LSD	Mean Diff.	95.00% CI of diff.	Below threshold?	Summary	Individual P Value
STC - HFD
0	-0.8552	-2.180 to 0.4698	No	ns	0.175
2	-0.1906	-1.516 to 1.134	No	ns	0.749
4	-2.671	-3.996 to -1.346	Yes	**	0.002
6	-6.889	-8.214 to -5.564	Yes	***	<.001
8	-8.453	-9.777 to -7.128	Yes	***	<.001
Test details	Mean 1	Mean 2	Mean Diff.	SE of diff.	N1	N2	t	DF
STC - HFD
0	1.078	1.933	-0.8552	0.5746	3	3	1.488	8
2	1.098	1.288	-0.1906	0.5746	3	3	0.3317	8
4	1.12	3.792	-2.671	0.5746	3	3	4.649	8
6	1.102	7.991	-6.889	0.5746	3	3	11.99	8
8	1.005	9.458	-8.453	0.5746	3	3	14.71	8
