# Supplementary material for: Amelioration of non-alcoholic fatty liver disease by targeting adhesion G protein-coupled receptor F1 (Adgrf1)
Source: eLife journal article supplement (doi:10.7554/elife.85131), 2023-08-02
Supplement: fig2-data1 [file Figure 2-Source 1.xlsx]

## Sheet: Figure 2B
Raw data
CTRL-HFD					Adgrf1-HFD
1	2	3	4	5	1	2	3	4	5
1.19438	1.01263	1.01237	0.84674	1.05872	29.5482	37.7918	29.1414	42.3826	34.8571
T test
Table Analyzed	Adgrf1-HFD
Column B	Adgrf1-HFD
vs.	vs.
Column A	CTRL-HFD
Unpaired t test
P value	<0.0001
P value summary	****
Significantly different (P < 0.05)?	Yes
One- or two-tailed P value?	Two-tailed
t, df	t=13.43, df=8
How big is the difference?
Mean of column A	1.025
Mean of column B	34.74
Difference between means (B - A) ± SEM	33.72 ± 2.511
95% confidence interval	27.93 to 39.51
R squared (eta squared)	0.9575
F test to compare variances
F, DFn, Dfd	2036, 4, 4
P value	<0.0001
P value summary	****
Significantly different (P < 0.05)?	Yes
Data analyzed
Sample size, column A	5
Sample size, column B	5

## Sheet: Figure 2D
Raw data
	Adgrf1-AAV-HFD								CTRL-AAV-HFD
1	2	3	4	5	6	7	8	1	2	3	4	5	6	7	8
2	39	36	39	39	45	39	37	37	36	35	36	44	44	38	35	38
4	41	37	42	40	46	40	39	39	34	33	35	42	42	38	37	39
6	43	39	43	42	47	42	40	41	35	34	35	40	42	39	38	40
8	46	40	43	43	47	43	42	42	36	33	36	43	42	41	36	41
10	47	44	44	43	47	45	45	43	39	35	34	43	44	42	37	39
12	48	44	45	46	46	46	46	44	41	38	35	43	44	43	37	40
Two-way ANOVA
Compare each cell mean with the other cell mean in that row
Number of families	1
Number of comparisons per family	6
Alpha	0.05
Šídák's multiple comparisons test	Mean Diff.	95.00% CI of diff.	Below threshold?	Summary	Adjusted P Value
Adgrf1-AAV-HFD- CTRL-AAV-HFD
Row 1	0.625	-2.396 to 3.646	No	ns	0.994
Row 2	3.25	0.2293 to 6.271	Yes	*	0.029
Row 3	4.25	1.229 to 7.271	Yes	**	0.002
Row 4	4.75	1.729 to 7.771	Yes	***	<.001
Row 5	5.625	2.604 to 8.646	Yes	***	<.001
Row 6	5.5	2.479 to 8.521	Yes	***	<.001
Test details	Mean 1	Mean 2	Mean Diff.	SE of diff.	N1	N2	t	DF
Adgrf1-AAV-HFD - CTRL-AAV-HFD
Row 1	38.88	38.25	0.625	1.094	8	8	0.5712	42
Row 2	40.75	37.5	3.25	1.094	8	8	2.97	42
Row 3	42.13	37.88	4.25	1.094	8	8	3.884	42
Row 4	43.25	38.5	4.75	1.094	8	8	4.341	42
Row 5	44.75	39.13	5.625	1.094	8	8	5.141	42
Row 6	45.63	40.13	5.5	1.094	8	8	5.027	42

## Sheet: Figure 2E
Raw data
Adgrf1-AAV-HFD								CTR110-AAV-HFD
1	2	3	4	5	6	7	8	1	2	3	4	5	6	7	8
32.6	28.7	28.1	28.2	30.5	33.5	30	33.8	27.8	22.7	29.9	25.9	29.6	25.8	25.9	23.2
t test
Table Analyzed	Figure 2E
Column B	CTR110-AAV-HFD
vs.	vs.
Column A	Adgrf1-AAV-HFD
Paired t test
P value	0.0167
P value summary	*
Significantly different (P < 0.05)?	Yes
One- or two-tailed P value?	Two-tailed
t, df	t=3.126, df=7
Number of pairs	8
How big is the difference?
Mean of differences (B - A)	-4.325
SD of differences	3.913
SEM of differences	1.384
95% confidence interval	-7.597 to -1.053
R squared (partial eta squared)	0.5826
How effective was the pairing?
Correlation coefficient (r)	-0.2223
P value (one tailed)	0.2983
P value summary	ns
Was the pairing significantly effective?	No

## Sheet: Figure 2F
Raw data
Adgrf1-AAV-HFD								CTR110-AAV-HFD
1	2	3	4	5	6	7	8	1	2	3	4	5	6	7	8
32.9	37	41	38.1	36.4	33.1	41.5	36.4	39.2	43.4	42.6	44.8	35.6	40.7	42.6	47
t test
Column B	CTRL-AAV-HFD
vs.	vs.
Column A	GPR110-AAV-HFD
Paired t test
P value	0.0087
P value summary	**
Significantly different (P < 0.05)?	Yes
One- or two-tailed P value?	Two-tailed
t, df	t=3.605, df=7
Number of pairs	8
How big is the difference?
Mean of differences (B - A)	4.938
SD of differences	3.874
SEM of differences	1.37
95% confidence interval	1.699 to 8.176
R squared (partial eta squared)	0.65
How effective was the pairing?
Correlation coefficient (r)	0.3292
P value (one tailed)	0.213
P value summary	ns
Was the pairing significantly effective?	No

## Sheet: Figure 2G
Raw data
	AAV-Adgrf1-HFD								AAV-CTRL-HFD
	1	2	3	4	5	6	7	8	1	2	3	4	5	6	7	8
2	127	132	149	141	148	155	150	149	126	133	149	155	126	134	137	138
4	153	158	147	164	164	171	167	170	129	149	154	158	144	153	141	140
6	170	181	158	164	184	171	179	184	130	153	141	163	146	144	152	151
8	185	183	161	179	163	164	192	185	127	154	160	174	153	149	155	144
10	185	188	193	174	196	184	196	192	131	159	169	154	169	157	169	156
12	188	183	190	189	197	181	198	196	144	168	165	162	175	174	163	160
Two-way ANOVA
Compare each cell mean with the other cell mean in that row
Number of families	1
Number of comparisons per family	6
Alpha	0.05
Šídák's multiple comparisons test	Mean Diff.	95.00% CI of diff.	Below threshold?	Summary	Adjusted P Value
AAV-Adgrf1-HFD - AAV-CTRL-HFD
2	6.625	-6.678 to 19.93	No	ns	0.688
4	15.75	2.447 to 29.05	Yes	*	0.013
6	26.38	13.07 to 39.68	Yes	***	<.001
8	24.5	11.20 to 37.80	Yes	***	<.001
10	30.5	17.20 to 43.80	Yes	***	<.001
12	26.38	13.07 to 39.68	Yes	***	<.001
Test details	Mean 1	Mean 2	Mean Diff.	SE of diff.	N1	N2	t	DF
AAV-Adgrf1-HFD - AAV-CTRL-HFD
2	143.9	137.3	6.625	4.818	8	8	1.375	42
4	161.8	146	15.75	4.818	8	8	3.269	42
6	173.9	147.5	26.38	4.818	8	8	5.474	42
8	176.5	152	24.5	4.818	8	8	5.085	42
10	188.5	158	30.5	4.818	8	8	6.33	42
12	190.3	163.9	26.38	4.818	8	8	5.474	42

## Sheet: Figure 2H
Raw data
	AAV-Adgrf1-HFD	AAV-CTRL-HFD
1	1.55699	0.714937
2	1.22446	1.11183
3	1.30491	1.07428
4	1.25939	1.18155
5	1.26391	1.1011
6	1.28573	0.837565
7	1.41744	0.931865
8	1.38613	0.831735
T test
Table Analyzed	Figure 2H
Column B	CTRL-HFD
vs.	vs.
Column A	Adgrf1-HFD
Unpaired t test
P value	0.0001
P value summary	***
Significantly different (P < 0.05)?	Yes
One- or two-tailed P value?	Two-tailed
t, df	t=5.142, df=14
How big is the difference?
Mean of column A	1.337
Mean of column B	0.9731
Difference between means (B - A) ± SEM	-0.3643 ± 0.07084
95% confidence interval	-0.5162 to -0.2123
R squared (eta squared)	0.6538
F test to compare variances
F, DFn, Dfd	2.307, 7, 7
P value	0.2924
P value summary	ns
Significantly different (P < 0.05)?	No
Data analyzed
Sample size, column A	8
Sample size, column B	8

## Sheet: Figure 2I
Raw data
AAV-Adgrf1-HFD								AAV-CTRL-HFD
1	2	3	4	5	6	7	8	1	2	3	4	5	6	7	8
17.4899	15.9204	14.066	16.3925	15.3919	15.4549	15.3951	15.0398	6.81421	10.4078	10.6658	11.6638	10.1824	8.02195	8.1029	9.20683
T test
Table Analyzed	Figure 2I
Column B	CTRL
vs.	vs.
Column A	AAV
Unpaired t test
P value	<0.0001
P value summary	****
Significantly different (P < 0.05)?	Yes
One- or two-tailed P value?	Two-tailed
t, df	t=9.238, df=14
How big is the difference?
Mean of column A	15.64
Mean of column B	9.383
Difference between means (B - A) ± SEM	-6.261 ± 0.6777
95% confidence interval	-7.714 to -4.807
R squared (eta squared)	0.8591
F test to compare variances
F, DFn, Dfd	2.643, 7, 7
P value	0.2231
P value summary	ns
Significantly different (P < 0.05)?	No
Data analyzed
Sample size, column A	8
Sample size, column B	8

## Sheet: Figure 2J
Raw data-curve
	AAV-Adgrf1								AAV-CTRL
	1	2	3	4	5	6	7	8	1	2	3	4	5	6	7	8
0	183	184	173	188	181	184	182	184	161	153	155	141	149	146	152	151
15	252	278	236	281	291	231	208	230	193	253	243	215	217	206	224	210
30	331	357	290	295	320	304	289	315	211	281	262	275	274	253	265	241
60	314	259	276	274	262	260	275	284	187	260	195	189	236	220	247	233
90	286	259	180	215	222	204	238	236	191	209	164	156	190	198	204	208
120	212	153	156	211	161	176	171	188	150	190	129	151	181	175	182	174
Two-way ANOVA
Compare each cell mean with the other cell mean in that row
Number of families
Number of comparisons per family	1
Alpha	6
	0.05
Šídák's multiple comparisons test
	Mean Diff.	95.00% CI of diff.	Below threshold?	Summary	Adjusted P Value
AAV-Adgrf1 - AAV-CTRL
Row 1
Row 2	31.38	0.2967 to 62.45	Yes	*	0.047
Row 3	30.75	-0.3283 to 61.83	No	ns	0.054
Row 4	54.88	23.80 to 85.95	Yes	***	<.001
Row 5	54.63	23.55 to 85.70	Yes	***	<.001
Row 6	40	8.922 to 71.08	Yes	**	0.006
	12	-19.08 to 43.08	No	ns	0.875
Test details
	Mean 1	Mean 2	Mean Diff.	SE of diff.	N1	N2	t	DF
AAV-Adgrf1-HFD - AAV-CTRL
Row 1
Row 2	182.4	151	31.38	11.26	8	8	2.787	42
Row 3	250.9	220.1	30.75	11.26	8	8	2.732	42
Row 4	312.6	257.8	54.88	11.26	8	8	4.875	42
Row 5	275.5	220.9	54.63	11.26	8	8	4.853	42
Row 6	230	190	40	11.26	8	8	3.553	42
	178.5	166.5	12	11.26	8	8	1.066	42
Raw data-AUC
Adgrf1
1366	AAV-CTRL
1297	905
1125	1151
1232	980
1240	961
1159	1062
1162	1035
1192	1038
	1029
t test-AUC
Table Analyzed
	Figure 2J-AUC
Column B
vs.	CTRL-HFD
Column A	vs.
	110-HFD
Unpaired t test
P value
P value summary	0.0001
Significantly different (P < 0.05)?	***
One- or two-tailed P value?	Yes
t, df	Two-tailed
	t=5.249, df=14
How big is the difference?
Mean of column A
Mean of column B	1222
Difference between means (B - A) ± SEM	1020
95% confidence interval	-201.5 ± 38.39
R squared (eta squared)	-283.8 to -119.2
	0.6631
F test to compare variances
F, DFn, Dfd
P value	1.180, 7, 7
P value summary	0.8331
Significantly different (P < 0.05)?	ns
	No
Data analyzed
Sample size, column A
Sample size, column B	8
	8

## Sheet: Figure 2K
Raw data-curve
	Adgrf1 AAV								CTRL AAV
	1	2	3	4	5	6	7	8	1	2	3	4	5	6	7	8
0	188	193	184	196	184	186	188	186	155	152	154	167	152	154	156	155
15	285	288	263	281	247	279	291	299	212	252	236	221	249	250	250	241
30	299	289	282	294	289	288	294	281	230	266	264	249	266	259	268	268
60	273	300	270	289	261	275	301	303	213	257	255	243	276	275	249	266
90	238	253	265	252	231	235	234	305	189	275	216	215	235	278	247	231
120	176	205	220	217	207	200	195	289	170	246	180	179	189	228	207	207
Two-way ANOVA
Compare each cell mean with the other cell mean in that row
Number of families	1
Number of comparisons per family	6
Alpha	0.05
Šídák's multiple comparisons test	Mean Diff.	95.00% CI of diff.	Below threshold?	Summary	Adjusted P Value
Adgrf1 AAV - CTRL AAV
Row 1	32.5	4.390 to 60.61	Yes	*	0.016
Row 2	40.25	12.14 to 68.36	Yes	**	0.002
Row 3	30.75	2.640 to 58.86	Yes	*	0.025
Row 4	29.75	1.640 to 57.86	Yes	*	0.033
Row 5	15.88	-12.24 to 43.99	No	ns	0.556
Row 6	12.88	-15.24 to 40.99	No	ns	0.762
Test details	Mean 1	Mean 2	Mean Diff.	SE of diff.	N1	N2	t	DF
Adgrf1 AAV - CTRL AAV
Row 1	188.1	155.6	32.5	10.18	8	8	3.192	42
Row 2	279.1	238.9	40.25	10.18	8	8	3.953	42
Row 3	289.5	258.8	30.75	10.18	8	8	3.02	42
Row 4	284	254.3	29.75	10.18	8	8	2.922	42
Row 5	251.6	235.8	15.88	10.18	8	8	1.559	42
Row 6	213.6	200.8	12.88	10.18	8	8	1.264	42
Raw data-AUC
	Adgrf1 HFD	CTRL-HFD
1	1585	1275
2	1684	1558
3	1626	1441
4	1618	1383
5	1541	1511
6	1605	1609
7	1475	1568
8	2122	1504
t test-AUC
Table Analyzed	Figure 2K-AUC
Column B	CTRL-HFD
vs.	vs.
Column A	Adgrf1 HFD
Unpaired t test
P value	0.0454
P value summary	*
Significantly different (P < 0.05)?	Yes
One- or two-tailed P value?	Two-tailed
t, df	t=2.197, df=14
How big is the difference?
Mean of column A	1657
Mean of column B	1481
Difference between means (B - A) ± SEM	-175.9 ± 80.05
95% confidence interval	-347.6 to -4.183
R squared (eta squared)	0.2564
F test to compare variances
F, DFn, Dfd	3.224, 7, 7
P value	0.1453
P value summary	ns
Significantly different (P < 0.05)?	No
Data analyzed
Sample size, column A	8
Sample size, column B	8

## Sheet: Figure 2L
Raw data-curve
	Adgrf1 AAV								CTRL AAV
	1	2	3	4	5	6	7	8	1	2	3	4	5	6	7	8
0	177	185	179	170	179	185	188	183	164	158	161	158	169	159	168	152
15	125	140	143	135	147	142	155	148	148	125	116	124	128	129	110	116
30	113	121	123	131	143	131	142	141	139	111	103	110	108	105	102	102
60	114	121	109	132	124	123	129	122	121	104	95	102	99	102	94	91
90	122	137	128	146	135	135	135	139	135	129	104	103	103	121	124	120
120	128	134	120	152	154	133	141	141	148	142	127	109	105	113	124	134
Two-way ANOVA
Compare each cell mean with the other cell mean in that row
Number of families	1
Number of comparisons per family	6
Alpha	0.05
Šídák's multiple comparisons test	Mean Diff.	95.00% CI of diff.	Below threshold?	Summary	Adjusted P Value
Adgrf1 AAV - CTRL-AAV
Row 1	19.63	1.886 to 37.36	Yes	*	0.023
Row 2	17.38	-0.3645 to 35.11	No	ns	0.058
Row 3	20.63	2.886 to 38.36	Yes	*	0.015
Row 4	20.75	3.011 to 38.49	Yes	*	0.014
Row 5	17.25	-0.4895 to 34.99	No	ns	0.061
Row 6	12.63	-5.114 to 30.36	No	ns	0.293
Test details	Mean 1	Mean 2	Mean Diff.	SE of diff.	N1	N2	t	DF
Adgrf1 AAV - CTRL-AAV
Row 1	180.8	161.1	19.63	6.426	8	8	3.054	42
Row 2	141.9	124.5	17.38	6.426	8	8	2.704	42
Row 3	130.6	110	20.63	6.426	8	8	3.21	42
Row 4	121.8	101	20.75	6.426	8	8	3.229	42
Row 5	134.6	117.4	17.25	6.426	8	8	2.685	42
Row 6	137.9	125.3	12.63	6.426	8	8	1.965	42
Raw data-AUC
	Adgrf1 HFD	CTRL-HFD
1	646.5	699
2	683.5	609
3	649.5	612
4	725	512.5
5	745	699
6	709	629
7	625.5	573
8	632	619
t test-AUC
Table Analyzed	Figure 2L-AUC
Column B	CTRL-HFD
vs.	vs.
Column A	Adgrf1 HFD
Unpaired t test
P value	0.05
P value summary	ns
Significantly different (P < 0.05)?	No
One- or two-tailed P value?	Two-tailed
t, df	t=2.145, df=14
How big is the difference?
Mean of column A	677
Mean of column B	619.1
Difference between means (B - A) ± SEM	-57.94 ± 27.01
95% confidence interval	-115.9 to 0.0009678
R squared (eta squared)	0.2473
F test to compare variances
F, DFn, Dfd	1.846, 7, 7
P value	0.4372
P value summary	ns
Significantly different (P < 0.05)?	No
Data analyzed
Sample size, column A	8
Sample size, column B	8
