# Supplementary material for: Amelioration of non-alcoholic fatty liver disease by targeting adhesion G protein-coupled receptor F1 (Adgrf1)
Source: eLife journal article supplement (doi:10.7554/elife.85131), 2023-08-02
Supplement: fig2-figsupp1-data1 [file Supplementary Figure1-Source 1.xlsx]

## Sheet: S Fig1B
raw data
CTRL-STC								Adgrf1-STC
0.85	0.9	0.8	1.2	1.3	1.25	1.11	1.73	31.4325	39.3641	25.4625	28.3564	30.3452	26.2345	24.5235	20.9859
t test
Table Analyzed	S Fig1B
Column B	Adgrf1-STC
vs.	vs.
Column A	CTRL-STC
Unpaired t test
P value	<0.0001
P value summary	****
Significantly different (P < 0.05)?	Yes
One- or two-tailed P value?	Two-tailed
t, df	t=13.81, df=14
How big is the difference?
Mean of column A	1.143
Mean of column B	28.34
Difference between means (B - A) ± SEM	27.20 ± 1.969
95% confidence interval	22.97 to 31.42
R squared (eta squared)	0.9316
F test to compare variances
F, DFn, Dfd	334.3, 7, 7
P value	<0.0001
P value summary	****
Significantly different (P < 0.05)?	Yes
Data analyzed
Sample size, column A	8
Sample size, column B	8

## Sheet: S Fig1C
raw data
	CTRL			AAV
Liver	0.894009	1.16355	0.942439	2.60688	3.46676	2.48988
Kidney	1.02122	0.983287	0.992383	0.923846	1.29328	1.02398
two-way ANOVA
Compare each cell mean with the other cell mean in that row
Number of families	1
Number of comparisons per family	2
Alpha	0.05
Šídák's multiple comparisons test	Mean Diff.	95.00% CI of diff.	Below threshold?	Summary	Adjusted P Value
CTRL-STC - AAV-STC
Liver	-1.855	-2.510 to -1.199	Yes	***	<.001
Kidney	-0.08141	-0.7365 to 0.5736	No	ns	0.933
Test details	Mean 1	Mean 2	Mean Diff.	SE of diff.	N1	N2	t	DF
CTRL-STC - AAV-STC
Liver	1	2.855	-1.855	0.2388	3	3	7.766	8
Kidney	0.999	1.08	-0.08141	0.2388	3	3	0.3409	8

## Sheet: S Fig1D
raw data
weeks	AAV								CTRL
2	23	23	21	21	22	23	23	23	24	22	22	21	21	21	22	24
4	25	24	22	22	24	23	26	25	25	22	22	22	22	23	22	24
6	24	23	23	24	24	23	25	25	24	23	23	22	22	23	23	24
8	25	26	25	25	26	24	26	25	25	24	23	24	24	26	23	25
10	27	26	26	27	27	25	27	26	27	26	24	25	26	27	23	25
12	29	28	28	28	27	26	27	27	28	27	25	26	26	28	24	26
two-way ANOVA
Compare each cell mean with the other cell mean in that row
Number of families	1
Number of comparisons per family	6
Alpha	0.05
Šídák's multiple comparisons test	Mean Diff.	95.00% CI of diff.	Below threshold?	Summary	Adjusted P Value
AAV - CTRL
Row 1	0.25	-1.169 to 1.669	No	ns	0.997
Row 2	1.125	-0.2939 to 2.544	No	ns	0.188
Row 3	0.875	-0.5439 to 2.294	No	ns	0.454
Row 4	1	-0.4189 to 2.419	No	ns	0.303
Row 5	1	-0.4189 to 2.419	No	ns	0.303
Row 6	1.25	-0.1689 to 2.669	No	ns	0.111
Test details	Mean 1	Mean 2	Mean Diff.	SE of diff.	N1	N2	t	DF
AAV - CTRL
Row 1	22.38	22.13	0.25	0.5139	8	8	0.4864	42
Row 2	23.88	22.75	1.125	0.5139	8	8	2.189	42
Row 3	23.88	23	0.875	0.5139	8	8	1.703	42
Row 4	25.25	24.25	1	0.5139	8	8	1.946	42
Row 5	26.38	25.38	1	0.5139	8	8	1.946	42
Row 6	27.5	26.25	1.25	0.5139	8	8	2.432	42

## Sheet: S Fig1E
raw data
weeks	CTRL
2	79	68	96	83	69	71	80	81
4	74	83	84	91	73	91	88	78
6	80	83	84	81	81	90	95	93
8	103	89	105	85	103	91	95	100
10	93	104	104	92	103	98	91	97
12	108	107	93	105	90	114	93	99
weeks	AAV
2	87	68	76	72	69	73	93	91
4	94	73	71	83	82	79	93	77
6	100	88	87	89	90	88	90	86
8	97	102	97	91	84	89	94	97
10	92	101	111	114	94	98	102	99
12	109	113	113	101	103	100	105	108
two-way ANOVA
Compare each cell mean with the other cell mean in that row
Number of families	1
Number of comparisons per family	6
Alpha	0.05
Šídák's multiple comparisons test	Mean Diff.	95.00% CI of diff.	Below threshold?	Summary	Adjusted P Value
AAV - CTRL
2	0.25	-9.594 to 10.09	No	ns	>.999
4	-1.25	-11.09 to 8.594	No	ns	>.999
6	3.875	-5.969 to 13.72	No	ns	0.874
8	-2.5	-12.34 to 7.344	No	ns	0.984
10	3.625	-6.219 to 13.47	No	ns	0.905
12	5.375	-4.469 to 15.22	No	ns	0.609
Test details	Mean 1	Mean 2	Mean Diff.	SE of diff.	N1	N2	t	DF
AAV - CTRL
2	78.63	78.38	0.25	3.653	8	8	0.06843	84
4	81.5	82.75	-1.25	3.653	8	8	0.3422	84
6	89.75	85.88	3.875	3.653	8	8	1.061	84
8	93.88	96.38	-2.5	3.653	8	8	0.6843	84
10	101.4	97.75	3.625	3.653	8	8	0.9922	84
12	106.5	101.1	5.375	3.653	8	8	1.471	84

## Sheet: S Fig1F
raw data
AAV	CTRL
0.462859	0.253687
0.237597	0.323411
0.773934	0.253687
0.334138	0.478949
0.275141	0.360955
0.334138	0.428652
0.259051	0.38721
0.35618	0.2365
t test
Table Analyzed	S Fig1F
Column B	CTRL
vs.	vs.
Column A	AAV
Unpaired t test
P value	0.5846
P value summary	ns
Significantly different (P < 0.05)?	No
One- or two-tailed P value?	Two-tailed
t, df	t=0.5597, df=14
How big is the difference?
Mean of column A	0.3791
Mean of column B	0.3404
Difference between means (B - A) ± SEM	-0.03875 ± 0.06924
95% confidence interval	-0.1872 to 0.1097
R squared (eta squared)	0.02188
F test to compare variances
F, DFn, Dfd	3.818, 7, 7
P value	0.0981
P value summary	ns
Significantly different (P < 0.05)?	No
Data analyzed
Sample size, column A	8
Sample size, column B	8

## Sheet: S Fig1G
raw data
AAV								CTRL
2.86229	1.5232	4.43469	1.95255	1.56097	1.2947	2.03815	1.8732	1.55439	1.96326	1.7385	2.8531	1.84304	2.09127	1.9472	1.63
t test
Table Analyzed	S Fig1G
Column B	ctrl
vs.	vs.
Column A	AAV
Unpaired t test
P value	0.5471
P value summary	ns
Significantly different (P < 0.05)?	No
One- or two-tailed P value?	Two-tailed
t, df	t=0.6170, df=14
How big is the difference?
Mean of column A	2.192
Mean of column B	1.953
Difference between means (B - A) ± SEM	-0.2399 ± 0.3887
95% confidence interval	-1.074 to 0.5939
R squared (eta squared)	0.02648
F test to compare variances
F, DFn, Dfd	6.354, 7, 7
P value	0.0262
P value summary	*
Significantly different (P < 0.05)?	Yes
Data analyzed
Sample size, column A	8
Sample size, column B	8

## Sheet: S Fig1H
raw data-curve
MIN	AAV								CTRL
0	93	90	110	101	80	88	85	90	95	99	111	96	91	88	97	101
15	159	142	168	142	139	141	170	168	147	125	146	158	130	160	158	169
30	177	171	182	168	155	180	195	177	163	142	149	161	149	171	160	168
60	155	163	157	159	147	150	148	166	148	135	128	141	129	135	149	138
90	121	150	148	119	130	144	147	151	129	117	101	147	109	131	144	120
120	105	123	116	98	113	120	118	105	104	99	95	129	92	99	102	105
two-way ANOVA
Compare each cell mean with the other cell mean in that row
Number of families	1
Number of comparisons per family	6
Alpha	0.05
Šídák's multiple comparisons test	Mean Diff.	95.00% CI of diff.	Below threshold?	Summary	Adjusted P Value
AAV - CTRL
Row 1	-5.125	-20.47 to 10.22	No	ns	0.932
Row 2	4.5	-10.85 to 19.85	No	ns	0.963
Row 3	17.75	2.403 to 33.10	Yes	*	0.016
Row 4	17.75	2.403 to 33.10	Yes	*	0.016
Row 5	14	-1.347 to 29.35	No	ns	0.09
Row 6	9.125	-6.222 to 24.47	No	ns	0.497
Test details	Mean 1	Mean 2	Mean Diff.	SE of diff.	N1	N2	t	DF
AAV - CTRL
Row 1	92.13	97.25	-5.125	5.559	8	8	0.9219	42
Row 2	153.6	149.1	4.5	5.559	8	8	0.8095	42
Row 3	175.6	157.9	17.75	5.559	8	8	3.193	42
Row 4	155.6	137.9	17.75	5.559	8	8	3.193	42
Row 5	138.8	124.8	14	5.559	8	8	2.518	42
Row 6	112.3	103.1	9.125	5.559	8	8	1.642	42
raw data-AUC
AAV	CTRL
711	686.5
732.5	618
768	627
687.5	739.5
667.5	608.5
719	710.5
761.5	730.5
759.5	718
t test
Table Analyzed	S Fig1H-AUC
Column B	CTRL
vs.	vs.
Column A	AAV
Unpaired t test with Welch's correction
P value	0.068
P value summary	ns
Significantly different (P < 0.05)?	No
One- or two-tailed P value?	Two-tailed
Welch-corrected t, df	t=1.999, df=12.33
How big is the difference?
Mean of column A	725.8
Mean of column B	679.8
Difference between means (B - A) ± SEM	-46.00 ± 23.01
95% confidence interval	-95.98 to 3.977
R squared (eta squared)	0.2448
F test to compare variances
F, DFn, Dfd	2.164, 7, 7
P value	0.33
P value summary	ns
Significantly different (P < 0.05)?	No
Data analyzed
Sample size, column A	8
Sample size, column B	8

## Sheet: S Fig1I
raw data-curve
MIN	AAV								CTRL
0	84	93	91	91	87	90	90	98	87	91	105	100	83	84	80	80
15	147	145	140	131	169	173	130	145	168	128	135	115	143	165	137	145
30	119	173	156	124	228	195	194	167	196	138	142	140	115	148	170	127
60	142	129	97	115	145	134	159	188	126	116	115	116	87	98	97	112
90	118	115	117	95	130	122	132	145	93	87	91	102	76	75	90	100
120	102	105	94	88	112	112	109	122	87	79	84	82	74	73	95	72
two-way ANOVA
Compare each cell mean with the other cell mean in that row
Number of families	1
Number of comparisons per family	6
Alpha	0.05
Šídák's multiple comparisons test	Mean Diff.	95.00% CI of diff.	Below threshold?	Summary	Adjusted P Value
AAV - CTRL
Row 1	1.75	-26.47 to 29.97	No	ns	>.999
Row 2	5.5	-22.72 to 33.72	No	ns	0.995
Row 3	22.5	-5.723 to 50.72	No	ns	0.184
Row 4	30.25	2.027 to 58.47	Yes	*	0.03
Row 5	32.5	4.277 to 60.72	Yes	*	0.017
Row 6	24.75	-3.473 to 52.97	No	ns	0.113
Test details	Mean 1	Mean 2	Mean Diff.	SE of diff.	N1	N2	t	DF
AAV - CTRL
Row 1	90.5	88.75	1.75	10.22	8	8	0.1712	42
Row 2	147.5	142	5.5	10.22	8	8	0.538	42
Row 3	169.5	147	22.5	10.22	8	8	2.201	42
Row 4	138.6	108.4	30.25	10.22	8	8	2.959	42
Row 5	121.8	89.25	32.5	10.22	8	8	3.179	42
Row 6	105.5	80.75	24.75	10.22	8	8	2.421	42
raw data-AUC
AAV	CTRL
542	670
654.5	554
582.5	577.5
554.5	564
671.5	599.5
525	564.5
714.5	581.5
655	560
t test-AUC
Table Analyzed	S Fig1I AUC
Column B	CTRL
vs.	vs.
Column A	AAV
Unpaired t test
P value	0.327
P value summary	ns
Significantly different (P < 0.05)?	No
One- or two-tailed P value?	Two-tailed
t, df	t=1.016, df=14
How big is the difference?
Mean of column A	612.4
Mean of column B	583.9
Difference between means (B - A) ± SEM	-28.56 ± 28.12
95% confidence interval	-88.88 to 31.75
R squared (eta squared)	0.06863
F test to compare variances
F, DFn, Dfd	3.455, 7, 7
P value	0.1241
P value summary	ns
Significantly different (P < 0.05)?	No
Data analyzed
Sample size, column A	8
Sample size, column B	8

## Sheet: S Fig1J
raw data-curve
MIN	AAV								CTRL
0	92	101	124	114	94	98	102	99	113	104	92	103	108	101	105	107
15	79	84	92	80	73	82	91	100	83	80	75	72	81	99	87	101
30	62	63	89	71	66	74	81	99	75	62	64	69	70	85	83	75
60	70	82	99	84	79	83	92	87	78	80	75	78	81	73	71	85
90	82	97	108	104	85	96	103	85	85	91	94	87	103	99	91	95
120	96	100	102	105	107	92	101	90	94	85	106	99	108	101	100	99
two-way ANOVA
Compare each cell mean with the other cell mean in that row
Number of families	1
Number of comparisons per family	6
Alpha	0.05
Šídák's multiple comparisons test	Mean Diff.	95.00% CI of diff.	Below threshold?	Summary	Adjusted P Value
AAV - CTRL
Row 1	-1.125	-13.22 to 10.97	No	ns	>.999
Row 2	0.375	-11.72 to 12.47	No	ns	>.999
Row 3	2.75	-9.343 to 14.84	No	ns	0.99
Row 4	6.875	-5.218 to 18.97	No	ns	0.548
Row 5	1.875	-10.22 to 13.97	No	ns	0.999
Row 6	0.125	-11.97 to 12.22	No	ns	>.999
Test details	Mean 1	Mean 2	Mean Diff.	SE of diff.	N1	N2	t	DF
AAV - CTRL
Row 1	103	104.1	-1.125	4.38	8	8	0.2568	42
Row 2	85.13	84.75	0.375	4.38	8	8	0.08561	42
Row 3	75.63	72.88	2.75	4.38	8	8	0.6278	42
Row 4	84.5	77.63	6.875	4.38	8	8	1.57	42
Row 5	95	93.13	1.875	4.38	8	8	0.4281	42
Row 6	99.13	99	0.125	4.38	8	8	0.02854	42
raw data-AUC
AAV	CTRL
387	424.5
426.5	407.5
501	407
448.5	407
403.5	443
430	457
468.5	434.5
465.5	459
t test-AUC
Table Analyzed	S Fig1J AUC
Column B	CTRL
vs.	vs.
Column A	AAV
Unpaired t test
P value	0.468
P value summary	ns
Significantly different (P < 0.05)?	No
One- or two-tailed P value?	Two-tailed
t, df	t=0.7460, df=14
How big is the difference?
Mean of column A	441.3
Mean of column B	429.9
Difference between means (B - A) ± SEM	-11.38 ± 15.25
95% confidence interval	-44.08 to 21.33
R squared (eta squared)	0.03823
F test to compare variances
F, DFn, Dfd	2.882, 7, 7
P value	0.1859
P value summary	ns
Significantly different (P < 0.05)?	No
Data analyzed
Sample size, column A	8
Sample size, column B	8
