# Supplementary material for: Amelioration of non-alcoholic fatty liver disease by targeting adhesion G protein-coupled receptor F1 (Adgrf1)
Source: eLife journal article supplement (doi:10.7554/elife.85131), 2023-08-02
Supplement: fig2-figsupp2-data1 [file Supplementary Figure 2-Source 1.xls]

## Sheet: S Fig 3A
raw data
	GFP					Adgrf1
SWAT	1.067	0.852	1.118	1.368	1.158	1.216	1.119	1.022	0.705	1.027
EWAT	0.801	0.869	0.878	0.991	1.264	1.147	1.27	0.931	0.615	1.389
BAT	0.708	1.149	1.025	1.245	0.614	0.728	0.83	1.265	0.821	0.805
two-way ANOVA
Compare each cell mean with the other cell mean in that row
Number of families	1
Number of comparisons per family	3
Alpha	0.05
Šídák's multiple comparisons test	Mean Diff.	95.00% CI of diff.	Below threshold?	Summary	Adjusted P Value
GFP - Adgrf1
SWAT	0.0948	-0.2798 to 0.4694	No	ns	0.891
EWAT	-0.1098	-0.4844 to 0.2648	No	ns	0.842
BAT	0.0584	-0.3162 to 0.4330	No	ns	0.971
Test details	Mean 1	Mean 2	Mean Diff.	SE of diff.	N1	N2	t	DF
GFP - Adgrf1
SWAT	1.113	1.018	0.0948	0.146	5	5	0.6494	24
EWAT	0.9606	1.07	-0.1098	0.146	5	5	0.7522	24
BAT	0.9482	0.8898	0.0584	0.146	5	5	0.4001	24

## Sheet: S Fig 3B
raw data
	GFP				Adgrf1
Full day	62.1011	61.1692	80.4371	114.602	73.2578	83.3766	109.608	97.0118
Light	8.1446	7.8349	7.1867	6.4615	5.7287	5.9098	5.4282	4.4788
Dark	53.9565	53.3343	73.2504	95.14	67.5291	77.4668	104.18	92.533
two-way ANOVA
Compare each cell mean with the other cell mean in that row
Number of families	1
Number of comparisons per family	3
Alpha	0.05
Šídák's multiple comparisons test	Mean Diff.	95.00% CI of diff.	Below threshold?	Summary	Adjusted P Value
GFP - Adgrf1
Full day	-11.24	-40.94 to 18.47	No	ns	0.703
Light	2.021	-27.68 to 31.73	No	ns	0.997
Dark	-16.51	-46.21 to 13.20	No	ns	0.409
Test details	Mean 1	Mean 2	Mean Diff.	SE of diff.	N1	N2	t	DF
GFP - Adgrf1
Full day	79.58	90.81	-11.24	11.29	4	4	0.9952	18
Light	7.407	5.386	2.021	11.29	4	4	0.179	18
Dark	68.92	85.43	-16.51	11.29	4	4	1.462	18

## Sheet: S Fig 3C
raw data
	GFP				Adgrf1
Full day	74.9543	84.9294	109.622	91.7138	66.0591	99.6735	109.706	115.822
Light	9.8182	6.3457	7.6234	7.4981	8.0846	7.3761	6.634	5.3583
Dark	65.1361	78.5837	101.999	84.2157	58.9745	92.2974	103.072	110.464
two-way ANOVA
Compare each cell mean with the other cell mean in that row
Number of families	1
Number of comparisons per family	3
Alpha	0.05
Šídák's multiple comparisons test	Mean Diff.	95.00% CI of diff.	Below threshold?	Summary	Adjusted P Value
GFP - Adgrf1
Full day	-7.51	-36.53 to 21.51	No	ns	0.878
Light	0.9581	-28.06 to 29.98	No	ns	>.999
Dark	-8.718	-37.74 to 20.30	No	ns	0.824
Test details	Mean 1	Mean 2	Mean Diff.	SE of diff.	N1	N2	t	DF
GFP - Adgrf1
Full day	90.3	97.82	-7.51	11.03	4	4	0.6809	18
Light	7.821	6.863	0.9581	11.03	4	4	0.08687	18
Dark	82.48	91.2	-8.718	11.03	4	4	0.7905	18

## Sheet: S Fig 3D
raw data
	GFP				Adgrf1
Full day	4.37721	3.97596	5.53953	5.86567	5.11038	6.19266	5.8872	6.05002
Light	0.331784	0.324686	0.427874	0.463123	0.38918	0.449771	0.415805	0.43421
Dark	4.05035	3.63244	5.1099	5.39063	4.72513	5.76947	5.50846	5.64699
two-way ANOVA
Compare each cell mean with the other cell mean in that row
Number of families	1
Number of comparisons per family	3
Alpha	0.05
Šídák's multiple comparisons test	Mean Diff.	95.00% CI of diff.	Below threshold?	Summary	Adjusted P Value
GFP - Adgrf1
Full day	-0.8705	-1.940 to 0.1995	No	ns	0.132
Light	-0.03537	-1.105 to 1.035	No	ns	>.999
Dark	-0.8667	-1.937 to 0.2033	No	ns	0.135
Test details	Mean 1	Mean 2	Mean Diff.	SE of diff.	N1	N2	t	DF
GFP - Adgrf1
Full day	4.94	5.81	-0.8705	0.4067	4	4	2.14	18
Light	0.3869	0.4222	-0.03537	0.4067	4	4	0.08698	18
Dark	4.546	5.413	-0.8667	0.4067	4	4	2.131	18

## Sheet: S Fig 3E
raw data
	GFP				Adgrf1
Full day	1.68915	3.14408	2.54862	3.39767	1.57709	4.10555	3.16219	4.806
Light	0.335298	0.09964	0.463937	0.75264	0.000526	1.00007	0.901836	0.067234
Dark	1.35385	3.04444	2.08468	2.64503	1.57656	3.10548	3.26035	4.73877
two-way ANOVA
Compare each cell mean with the other cell mean in that row
Number of families	1
Number of comparisons per family	3
Alpha	0.05
Šídák's multiple comparisons test	Mean Diff.	95.00% CI of diff.	Below threshold?	Summary	Adjusted P Value
GFP - Adgrf1
Full day	-0.7178	-2.432 to 0.9962	No	ns	0.635
Light	-0.07954	-1.794 to 1.635	No	ns	>.999
Dark	-0.8883	-2.602 to 0.8258	No	ns	0.468
Test details	Mean 1	Mean 2	Mean Diff.	SE of diff.	N1	N2	t	DF
GFP - Adgrf1
Full day	2.695	3.413	-0.7178	0.6515	4	4	1.102	18
Light	0.4129	0.4924	-0.07954	0.6515	4	4	0.1221	18
Dark	2.282	3.17	-0.8883	0.6515	4	4	1.364	18

## Sheet: S Fig 3F
raw data
	GFP				Adgrf1
Full day	0.643524	1.35599	1.28764	1.40539	0.74277	1.38228	1.13687	1.44487
Light	0.109518	0.167223	0.030561	0.368548	0	0.108477	0	0.121463
Dark	0.534006	1.18876	1.25708	1.03684	0.74277	1.2738	1.13687	1.32341
two-way ANOVA
Compare each cell mean with the other cell mean in that row
Number of families	1
Number of comparisons per family	3
Alpha	0.05
Šídák's multiple comparisons test	Mean Diff.	95.00% CI of diff.	Below threshold?	Summary	Adjusted P Value
GFP - Adgrf1
Full day	-0.003564	-0.5014 to 0.4942	No	ns	>.999
Light	0.1115	-0.3863 to 0.6093	No	ns	0.917
Dark	-0.115	-0.6128 to 0.3828	No	ns	0.909
Test details	Mean 1	Mean 2	Mean Diff.	SE of diff.	N1	N2	t	DF
GFP - Adgrf1
Full day	1.173	1.177	-0.003564	0.1892	4	4	0.01884	18
Light	0.169	0.05749	0.1115	0.1892	4	4	0.5892	18
Dark	1.004	1.119	-0.115	0.1892	4	4	0.6081	18

## Sheet: S Fig 3G
raw data
	GFP				Adgrf1
Full day	0.778501	0.802145	0.790079	0.786659	0.783846	0.799556	0.792176	0.794209
Light	0.823528	0.842178	0.797962	0.835528	0.818093	0.843829	0.821472	0.809959
Dark	0.770996	0.795473	0.788765	0.778515	0.778138	0.792177	0.787294	0.791585
two-way ANOVA
Compare each cell mean with the other cell mean in that row
Number of families	1
Number of comparisons per family	3
Alpha	0.05
Šídák's multiple comparisons test	Mean Diff.	95.00% CI of diff.	Below threshold?	Summary	Adjusted P Value
GFP - Adgrf1
Full day	-0.003101	-0.02573 to 0.01953	No	ns	0.979
Light	0.001461	-0.02117 to 0.02409	No	ns	0.998
Dark	-0.003861	-0.02650 to 0.01877	No	ns	0.96
Test details	Mean 1	Mean 2	Mean Diff.	SE of diff.	N1	N2	t	DF
GFP - Adgrf1
Full day	0.7893	0.7924	-0.003101	0.008602	4	4	0.3604	18
Light	0.8248	0.8233	0.001461	0.008602	4	4	0.1698	18
Dark	0.7834	0.7873	-0.003861	0.008602	4	4	0.4489	18
