# Supplementary material for: Amelioration of non-alcoholic fatty liver disease by targeting adhesion G protein-coupled receptor F1 (Adgrf1)
Source: eLife journal article supplement (doi:10.7554/elife.85131), 2023-08-02
Supplement: fig3-data1 [file Figure 3-Source 1.xlsx]

## Sheet: Figure 3B
Raw data
CTRL
0.339151	2.20381	2.15846	0.604997	1.02456	1.03	0.89	0.94
AAV
51.5	32.9	50.8	38.7	44.6	49.8	48.1	35.9
ASO1
8.1	5.2	8.4	9.5	10	9.3	8.1	9.6
ASO2
7.3	8.8	6.4	5.1	10.2	5.9	4.2	6.9
one-way ANOVA
Number of families	1
Number of comparisons per family	3
Alpha	0.05
Dunnett's multiple comparisons test	Mean Diff.	95.00% CI of diff.	Below threshold?	Summary	Adjusted P Value	B-?
AAV vs. ASO1	35.51	30.73 to 40.30	Yes	***	<.001	A	ASO1
AAV vs. CTRL	42.89	38.10 to 47.68	Yes	***	<.001	C	CTRL
AAV vs. ASO2	37.19	32.40 to 41.97	Yes	***	<.001	D	ASO2
Test details	Mean 1	Mean 2	Mean Diff.	SE of diff.	n1	n2	q	DF
AAV vs. ASO1	44.04	8.525	35.51	1.928	8	8	18.42	28
AAV vs. CTRL	44.04	1.149	42.89	1.928	8	8	22.25	28
AAV vs. ASO2	44.04	6.85	37.19	1.928	8	8	19.29	28

## Sheet: Figure 3C
raw data
CTRL
0.929133	1.03837	1.0325
AAV
1.33448	1.41986	1.39155
ASO1
0.651515	0.682316	0.651902
ASO2
0.625581	0.609787	0.564416
one-way ANOVA
Number of families	1
Number of comparisons per family	3
Alpha	0.05
Dunnett's multiple comparisons test	Mean Diff.	95.00% CI of diff.	Below threshold?	Summary	Adjusted P Value	B-?
aav vs. ctrl	0.382	0.3009 to 0.4630	Yes	**	0.002	A	ctrl
aav vs. aso	0.7201	0.6075 to 0.8326	Yes	**	0.001	C	aso
aav vs. aso2	0.782	0.5582 to 1.006	Yes	**	0.004	D	aso2
Test details	Mean 1	Mean 2	Mean Diff.	SE of diff.	n1	n2	q	DF
aav vs. ctrl	1.382	1	0.382	0.01337	3	3	28.58	2
aav vs. aso	1.382	0.6619	0.7201	0.01855	3	3	38.81	2
aav vs. aso2	1.382	0.5999	0.782	0.0369	3	3	21.19	2

## Sheet: Figure 3D
raw data
weeks	CTRL
2	42	42	46	45	44	47	49	45
4	42	43	45	43	44	46	48	47
6	44	44	46	45	46	45	49	48
8	44	46	48	45	47	47	48	49
10	45	46	48	46	49	48	49	50
12	46	46	49	46	50	50	51	50
weeks	AAV
2	43	46	50	45	44	47	48	42
4	45	50	52	47	46	48	49	44
6	46	53	53	49	49	51	51	47
8	47	54	55	51	52	54	52	49
10	48	55	56	52	53	54	52	52
12	50	56	55	55	52	53	54	53
weeks	ASO1
2	44	46	44	45	44	42	41	46
4	46	46	43	44	45	44	43	45
6	47	48	45	46	43	45	44	42
8	47	48	46	48	45	46	44	45
10	48	50	46	50	46	46	48	44
12	50	51	47	50	46	48	46	46
weeks	ASO2
2	43	43	43	44	44	48	47	42
4	45	44	44	44	45	46	49	41
6	45	45	45	46	46	44	49	43
8	47	45	46	47	48	47	47	45
10	47	47	48	47	47	49	49	47
12	50	47	50	49	48	49	50	49
two-way ANOVA
Within each row, compare columns (simple effects within rows)
Number of families	6
Number of comparisons per family	3
Alpha	0.05
Dunnett's multiple comparisons test	Mean Diff.	95.00% CI of diff.	Below threshold?	Summary	Adjusted P Value
2
AAV vs. ASO1	1.625	-2.460 to 5.710	No	ns	0.537
AAV vs. CTRL	0.625	-1.882 to 3.132	No	ns	0.804
AAV vs. ASO2	1.375	-1.314 to 4.064	No	ns	0.361
4
AAV vs. ASO1	3.125	-0.4892 to 6.739	No	ns	0.087
AAV vs. CTRL	2.875	-0.5603 to 6.310	No	ns	0.098
AAV vs. ASO2	2.875	-0.1190 to 5.869	No	ns	0.059
6
AAV vs. ASO1	4.875	1.934 to 7.816	Yes	**	0.004
AAV vs. CTRL	4	0.6313 to 7.369	Yes	*	0.024
AAV vs. ASO2	4.5	1.583 to 7.417	Yes	**	0.006
8
AAV vs. ASO1	5.625	2.403 to 8.847	Yes	**	0.003
AAV vs. CTRL	5	2.249 to 7.751	Yes	**	0.003
AAV vs. ASO2	5.25	2.086 to 8.414	Yes	**	0.004
10
AAV vs. ASO1	5.5	1.949 to 9.051	Yes	**	0.006
AAV vs. CTRL	5.125	2.465 to 7.785	Yes	**	0.002
AAV vs. ASO2	5.125	2.650 to 7.600	Yes	**	0.001
12
AAV vs. ASO1	5.5	2.807 to 8.193	Yes	**	0.001
AAV vs. CTRL	5	1.824 to 8.176	Yes	**	0.006
AAV vs. ASO2	4.5	1.867 to 7.133	Yes	**	0.004
Test details	Mean 1	Mean 2	Mean Diff.	SE of diff.	N1	N2	q	DF
2
AAV vs. ASO1	45.63	44	1.625	1.375	8	8	1.182	7
AAV vs. CTRL	45.63	45	0.625	0.8438	8	8	0.7407	7
AAV vs. ASO2	45.63	44.25	1.375	0.9051	8	8	1.519	7
4
AAV vs. ASO1	47.63	44.5	3.125	1.217	8	8	2.569	7
AAV vs. CTRL	47.63	44.75	2.875	1.156	8	8	2.486	7
AAV vs. ASO2	47.63	44.75	2.875	1.008	8	8	2.853	7
6
AAV vs. ASO1	49.88	45	4.875	0.9899	8	8	4.925	7
AAV vs. CTRL	49.88	45.88	4	1.134	8	8	3.528	7
AAV vs. ASO2	49.88	45.38	4.5	0.982	8	8	4.583	7
8
AAV vs. ASO1	51.75	46.13	5.625	1.085	8	8	5.186	7
AAV vs. CTRL	51.75	46.75	5	0.9258	8	8	5.401	7
AAV vs. ASO2	51.75	46.5	5.25	1.065	8	8	4.93	7
10
AAV vs. ASO1	52.75	47.25	5.5	1.195	8	8	4.602	7
AAV vs. CTRL	52.75	47.63	5.125	0.8952	8	8	5.725	7
AAV vs. ASO2	52.75	47.63	5.125	0.8332	8	8	6.151	7
12
AAV vs. ASO1	53.5	48	5.5	0.9063	8	8	6.068	7
AAV vs. CTRL	53.5	48.5	5	1.069	8	8	4.677	7
AAV vs. ASO2	53.5	49	4.5	0.8864	8	8	5.077	7

## Sheet: Figure 3E
raw data
CTRL
24.54	28.3	30.51	31.6	27.22	28.39	23.03	25.93
AAV
34.38	35.45	34.98	35.39	36.18	35.93	36.2	37.31
ASO1
28.17	26.13	27.71	26.43	25.39	24.95	28.31	25.67
ASO2
27.76	29.92	28.24	28.99	25.31	23.59	28.94	25.55
one-way ANOVA
Number of families	1
Number of comparisons per family	3
Alpha	0.05
Dunnett's multiple comparisons test	Mean Diff.	95.00% CI of diff.	Below threshold?	Summary	Adjusted P Value	B-?
AAV vs. ASO1	9.133	7.106 to 11.16	Yes	***	<.001	A	ASO1
AAV vs. CTRL	8.288	4.897 to 11.68	Yes	***	<.001	C	CTRL
AAV vs. ASO2	8.44	5.567 to 11.31	Yes	***	<.001	D	ASO2
Test details	Mean 1	Mean 2	Mean Diff.	SE of diff.	n1	n2	q	DF
AAV vs. ASO1	35.73	26.6	9.133	0.6823	8	8	13.39	7
AAV vs. CTRL	35.73	27.44	8.288	1.141	8	8	7.263	7
AAV vs. ASO2	35.73	27.29	8.44	0.967	8	8	8.728	7

## Sheet: Figure 3F
raw data
CTRL
44.06	42.82	39.27	37.86	44.07	44.61	45.93	44.14
AAV
35.54	36.91	36.94	35.92	33.15	31.96	30.86	34.63
ASO1
41.75	45.06	43.19	42.01	44.38	41.93	40.88	39.12
ASO2
44.36	45.38	45.02	42.93	46.39	43.45	43.6	43.04
one-way ANOVA
Number of families	1
Number of comparisons per family	3
Alpha	0.05
Dunnett's multiple comparisons test	Mean Diff.	95.00% CI of diff.	Below threshold?	Summary	Adjusted P Value	B-?
AAV vs. ASO1	-7.801	-10.32 to -5.280	Yes	***	<.001	A	ASO1
AAV vs. CTRL	-8.356	-13.30 to -3.415	Yes	**	0.004	C	CTRL
AAV vs. ASO2	-9.783	-12.25 to -7.312	Yes	***	<.001	D	ASO2
Test details	Mean 1	Mean 2	Mean Diff.	SE of diff.	n1	n2	q	DF
AAV vs. ASO1	34.49	42.29	-7.801	0.8487	8	8	9.192	7
AAV vs. CTRL	34.49	42.85	-8.356	1.663	8	8	5.024	7
AAV vs. ASO2	34.49	44.27	-9.783	0.8317	8	8	11.76	7

## Sheet: Figure 3G
raw data
weeks	CTRL
2	124	134	131	124	136	149	145	142
4	149	135	125	156	150	142	146	153
6	145	139	141	133	140	154	137	148
8	151	132	150	135	148	149	142	144
10	165	139	142	144	146	162	150	146
12	168	141.6	144	152	152	148	149	141
weeks	AAV
2	132	138	137	146	138	134	152	142
4	164	166	155	154	157	155	148	149
6	177	162	164	159	164	162	159	157
8	189	170	172	171	184	158	164	162
10	182	172	194	186	178	169	180	178
12	180	188	185	184	172	184	168	177
weeks	ASO1
2	135	134	144	141	142	140	135	132
4	154	155	149	151	153	152	133	129
6	143	149	151	152	151	148	145	135
8	149	162	141	154	154	155	148	146
10	161	151	162	153	157	158	148	142
12	160	159	150	168	156	161	155	152
weeks	ASO2
2	132	137	137	139	139	145	149	133
4	145	149	141	140	149	137	144	140
6	149	147	155	148	146	139	140	164
8	160	151	147	156	153	148	130	147
10	151	157	163	160	154	159	152	164
12	160	160	166	159	149	163	158	148
Within each row, compare columns (simple effects within rows)
Number of families	6
Number of comparisons per family	3
Alpha	0.05
Dunnett's multiple comparisons test	Mean Diff.	95.00% CI of diff.	Below threshold?	Summary	Adjusted P Value
2
AAV vs. ASO1	2	-6.948 to 10.95	No	ns	0.846
AAV vs. CTRL	4.25	-6.502 to 15.00	No	ns	0.541
AAV vs. ASO2	1	-5.327 to 7.327	No	ns	0.934
4
AAV vs. ASO1	9	2.501 to 15.50	Yes	*	0.011
AAV vs. CTRL	11.5	-2.648 to 25.65	No	ns	0.108
AAV vs. ASO2	12.88	7.248 to 18.50	Yes	***	<.001
6
AAV vs. ASO1	16.25	7.593 to 24.91	Yes	**	0.002
AAV vs. CTRL	20.88	12.21 to 29.54	Yes	***	<.001
AAV vs. ASO2	14.5	3.327 to 25.67	Yes	*	0.016
8
AAV vs. ASO1	20.13	6.988 to 33.26	Yes	**	0.007
AAV vs. CTRL	27.38	15.75 to 39.00	Yes	***	<.001
AAV vs. ASO2	22.25	13.08 to 31.42	Yes	***	<.001
10
AAV vs. ASO1	25.88	16.81 to 34.94	Yes	***	<.001
AAV vs. CTRL	30.63	16.09 to 45.16	Yes	**	0.001
AAV vs. ASO2	22.38	13.73 to 31.02	Yes	***	<.001
12
AAV vs. ASO1	22.13	14.34 to 29.91	Yes	***	<.001
AAV vs. CTRL	30.3	17.68 to 42.92	Yes	***	<.001
AAV vs. ASO2	21.88	15.56 to 28.19	Yes	***	<.001
Test details	Mean 1	Mean 2	Mean Diff.	SE of diff.	N1	N2	q	DF
2
AAV vs. ASO1	139.9	137.9	2	3.012	8	8	0.664	7
AAV vs. CTRL	139.9	135.6	4.25	3.619	8	8	1.174	7
AAV vs. ASO2	139.9	138.9	1	2.13	8	8	0.4695	7

## Sheet: Figure 3H
raw data
CTRL
0.81	0.83	1.45	1.04	1.31	1.02	1.2	0.83
AAV
1.84	1.89	1.71	1.85	1.94	1.89	1.92	2.05
ASO1
1.56	1.45	1.69	1.6	1.29	1.43	1.18	1.46
ASO2
1.63	1.43	1.25	1.6	1.58	1.44	1.56	1.47
one-way ANOVA
Number of families	1
Number of comparisons per family	3
Alpha	0.05
Dunnett's multiple comparisons test	Mean Diff.	95.00% CI of diff.	Below threshold?	Summary	Adjusted P Value	B-?
AAV vs. CTRL	0.825	0.5114 to 1.139	Yes	***	<.001	A	CTRL
AAV vs. ASO1	0.4288	0.1795 to 0.6780	Yes	**	0.004	C	ASO1
AAV vs. ASO2	0.3913	0.2637 to 0.5188	Yes	***	<.001	D	ASO2
Test details	Mean 1	Mean 2	Mean Diff.	SE of diff.	n1	n2	q	DF
AAV vs. CTRL	1.886	1.061	0.825	0.1055	8	8	7.817	7
AAV vs. ASO1	1.886	1.458	0.4288	0.08389	8	8	5.111	7
AAV vs. ASO2	1.886	1.495	0.3913	0.04295	8	8	9.11	7

## Sheet: Figure 3I
raw data
CTRL
10.8064	6.63442	11.7991	8.35984	10.4437	9.04966	8.9486	8.95826
AAV
19.7432	18.8805	17.3889	19.4954	20.0124	18.3966	17.4029	19.0439
ASO1
13.3053	13.6143	13.0586	14.2797	13.4933	14.2386	14.6946	12.8375
ASO2
13.2042	12.4523	13.6417	13.6544	12.237	13.1951	12.3069	14.3827
one-way ANOVA
Number of families	1
Number of comparisons per family	3
Alpha	0.05
Dunnett's multiple comparisons test	Mean Diff.	95.00% CI of diff.	Below threshold?	Summary	Adjusted P Value	B-?
AAV vs. aso	5.105	3.715 to 6.496	Yes	***	<.001	A	aso
AAV vs. CTRL	9.42	7.349 to 11.49	Yes	***	<.001	C	CTRL
AAV vs. aso2	5.661	4.341 to 6.981	Yes	***	<.001	D	aso2
Test details	Mean 1	Mean 2	Mean Diff.	SE of diff.	n1	n2	q	DF
AAV vs. aso	18.8	13.69	5.105	0.4681	8	8	10.91	7
AAV vs. CTRL	18.8	9.375	9.42	0.6974	8	8	13.51	7
AAV vs. aso2	18.8	13.13	5.661	0.4443	8	8	12.74	7

## Sheet: Figure 3J
raw data-curve
	CTRL
0	166	148	136	157	141	145	153	139
15	232	249	235	229	215	248	236	224
30	301	298	286	277	306	264	283	263
60	282	267	254	279	276	283	270	233
90	225	201	230	242	231	222	235	210
120	161	161	197	199	187	195	188	171
	AAV
0	189	178	183	182	164	183	172	185
15	338	359	346	325	353	325	312	339
30	433	435	465	401	431	428	401	424
60	403	450	447	394	399	381	375	391
90	359	341	338	351	358	342	349	336
120	295	230	256	240	284	293	301	281
	ASO1
0	152	156	153	160	162	149	152	155
15	238	255	243	229	239	248	258	234
30	302	319	333	324	328	290	286	291
60	285	274	297	308	302	285	268	282
90	249	249	254	262	274	246	234	247
120	214	229	175	196	239	202	183	192
	ASO2
0	166	155	150	155	153	162	149	164
15	256	264	279	281	285	294	302	312
30	314	335	360	367	300	341	326	338
60	299	301	328	326	312	303	284	293
90	264	273	288	282	286	271	273	259
120	223	236	259	244	235	238	258	231
two-way ANOVA-curve
Within each row, compare columns (simple effects within rows)
Number of families	6
Number of comparisons per family	3
Alpha	0.05
Dunnett's multiple comparisons test	Mean Diff.	95.00% CI of diff.	Below threshold?	Summary	Adjusted P Value
Row 1
AAV vs. ASO1	24.63	13.08 to 36.17	Yes	**	0.001
AAV vs. CTRL	31.38	19.88 to 42.87	Yes	***	<.001
AAV vs. ASO2	22.75	16.26 to 29.24	Yes	***	<.001
Row 2
AAV vs. ASO1	94.13	73.76 to 114.5	Yes	***	<.001
AAV vs. CTRL	103.6	82.09 to 125.2	Yes	***	<.001
AAV vs. ASO2	53	21.95 to 84.05	Yes	**	0.004
Row 3
AAV vs. ASO1	118.1	96.71 to 139.5	Yes	***	<.001
AAV vs. CTRL	142.5	118.9 to 166.1	Yes	***	<.001
AAV vs. ASO2	92.13	60.87 to 123.4	Yes	***	<.001
Row 4
AAV vs. ASO1	117.4	85.28 to 149.5	Yes	***	<.001
AAV vs. CTRL	137	98.97 to 175.0	Yes	***	<.001
AAV vs. ASO2	99.25	72.51 to 126.0	Yes	***	<.001
Row 5
AAV vs. ASO1	94.88	82.65 to 107.1	Yes	***	<.001
AAV vs. CTRL	122.3	110.1 to 134.4	Yes	***	<.001
AAV vs. ASO2	72.25	59.21 to 85.29	Yes	***	<.001
Row 6
AAV vs. ASO1	68.75	30.26 to 107.2	Yes	**	0.003
AAV vs. CTRL	90.13	57.43 to 122.8	Yes	***	<.001
AAV vs. ASO2	32	-0.8054 to 64.81	No	ns	0.055
Test details	Mean 1	Mean 2	Mean Diff.	SE of diff.	N1	N2	q
Row 1
AAV vs. ASO1	179.5	154.9	24.63	3.887	8	8	6.336
AAV vs. CTRL	179.5	148.1	31.38	3.868	8	8	8.111
AAV vs. ASO2	179.5	156.8	22.75	2.186	8	8	10.41
Row 2
AAV vs. ASO1	337.1	243	94.13	6.854	8	8	13.73
AAV vs. CTRL	337.1	233.5	103.6	7.248	8	8	14.3
AAV vs. ASO2	337.1	284.1	53	10.45	8	8	5.071
Row 3
AAV vs. ASO1	427.3	309.1	118.1	7.207	8	8	16.39
AAV vs. CTRL	427.3	284.8	142.5	7.935	8	8	17.96
AAV vs. ASO2	427.3	335.1	92.13	10.52	8	8	8.758
Row 4
AAV vs. ASO1	405	287.6	117.4	10.8	8	8	10.86
AAV vs. CTRL	405	268	137	12.8	8	8	10.7
AAV vs. ASO2	405	305.8	99.25	9	8	8	11.03
Row 5
AAV vs. ASO1	346.8	251.9	94.88	4.116	8	8	23.05
AAV vs. CTRL	346.8	224.5	122.3	4.1	8	8	29.81
AAV vs. ASO2	346.8	274.5	72.25	4.391	8	8	16.46
Row 6
AAV vs. ASO1	272.5	203.8	68.75	12.95	8	8	5.307
AAV vs. CTRL	272.5	182.4	90.13	11	8	8	8.19
AAV vs. ASO2	272.5	240.5	32	11.04	8	8	2.898
raw data-AUC
CTRL	AAV	ASO1	ASO2
1204	1775	1257	1328
1170	1789	1290	1369
1172	1816	1291	1460
1205	1682	1301	1456
1192	1765	1344	1377
1187	1714	1245	1409
1195	1674	1214	1389
1085	1723	1228	1400
two-way ANOVA-AUC
Compare column means (main column effect)
Number of families	1
Number of comparisons per family	3
Alpha	0.05
Dunnett's multiple comparisons test	Mean Diff.	95.00% CI of diff.	Below threshold?	Summary	Adjusted P Value
ASO1 vs. AAV	-471	-524.6 to -417.4	Yes	***	<.001
ASO1 vs. CTRL	95	41.43 to 148.6	Yes	***	<.001
ASO1 vs. ASO2	-127.3	-180.8 to -73.68	Yes	***	<.001
Test details	Mean 1	Mean 2	Mean Diff.	SE of diff.	N1	N2	q	DF
ASO1 vs. AAV	1271	1742	-471	21.17	8	8	22.25	21
ASO1 vs. CTRL	1271	1176	95	21.17	8	8	4.488	21
ASO1 vs. ASO2	1271	1399	-127.3	21.17	8	8	6.012	21

## Sheet: Figure 3K
raw data-curve
min	CTRL
0	158	165	157	154	163	159	153	155
15	182	164	174	201	201	192	185	172
30	203	186	210	225	201	203	219	213
60	211	189	269	219	202	198	192	183
90	202	197	269	243	192	175	184	176
120	161	147	148	133	138	143	149	161
	AAV
0	189	174	176	178	184	182	181	179
15	211	201	204	205	201	200	199	192
30	287	290	251	269	283	258	291	280
60	320	284	338	321	329	286	303	318
90	258	282	320	301	294	256	287	284
120	176	162	163	153	204	173	185	172
	ASO1
0	162	143	155	152	150	153	158	152
15	188	170	179	174	165	171	185	182
30	255	243	252	219	240	245	219	226
60	251	242	247	255	234	231	245	219
90	308	225	226	260	283	282	261	243
120	208	155	122	141	150	182	179	178
	ASO2
0	165	158	164	166	164	165	159	156
15	182	174	188	179	184	184	171	182
30	215	229	236	249	213	214	242	228
60	224	254	215	240	226	238	236	218
90	221	242	201	242	224	215	203	229
120	184	179	168	184	182	179	177	185
two-way ANOVA-curve
Within each row, compare columns (simple effects within rows)
Number of families	6
Number of comparisons per family	3
Alpha	0.05
Dunnett's multiple comparisons test	Mean Diff.	95.00% CI of diff.	Below threshold?	Summary	Adjusted P Value
Row 1
AAV vs. CTRL	22.38	15.45 to 29.30	Yes	***	<.001
AAV vs. ASO1	27.25	22.87 to 31.63	Yes	***	<.001
AAV vs. ASO2	18.25	13.27 to 23.23	Yes	***	<.001
Row 2
AAV vs. CTRL	17.75	3.627 to 31.87	Yes	*	0.018
AAV vs. ASO1	24.88	15.49 to 34.26	Yes	***	<.001
AAV vs. ASO2	21.13	13.58 to 28.67	Yes	***	<.001
Row 3
AAV vs. CTRL	68.63	46.04 to 91.21	Yes	***	<.001
AAV vs. ASO1	38.75	14.15 to 63.35	Yes	**	0.006
AAV vs. ASO2	47.88	25.65 to 70.10	Yes	***	<.001
Row 4
AAV vs. CTRL	80.5	56.28 to 104.7	Yes	***	<.001
AAV vs. ASO1	24.25	-23.91 to 72.41	No	ns	0.372
AAV vs. ASO2	63.13	33.96 to 92.29	Yes	***	<.001
Row 5
AAV vs. CTRL	44.75	15.75 to 73.75	Yes	**	0.006
AAV vs. ASO1	6.75	-32.48 to 45.98	No	ns	0.918
AAV vs. ASO2	31.13	1.578 to 60.67	Yes	*	0.04
Row 6
AAV vs. CTRL	26	6.795 to 45.20	Yes	*	0.013
AAV vs. ASO1	9.125	-19.78 to 38.03	No	ns	0.685
AAV vs. ASO2	-6.25	-23.00 to 10.50	No	ns	0.58
Test details	Mean 1	Mean 2	Mean Diff.	SE of diff.	N1	N2	q
Row 1
AAV vs. CTRL	180.4	158	22.38	2.329	8	8	9.605
AAV vs. ASO1	180.4	153.1	27.25	1.473	8	8	18.5
AAV vs. ASO2	180.4	162.1	18.25	1.677	8	8	10.88
Row 2
AAV vs. CTRL	201.6	183.9	17.75	4.754	8	8	3.734
AAV vs. ASO1	201.6	176.8	24.88	3.159	8	8	7.874
AAV vs. ASO2	201.6	180.5	21.13	2.539	8	8	8.322
Row 3
AAV vs. CTRL	276.1	207.5	68.63	7.602	8	8	9.028
AAV vs. ASO1	276.1	237.4	38.75	8.28	8	8	4.68
AAV vs. ASO2	276.1	228.3	47.88	7.482	8	8	6.399
Row 4
AAV vs. CTRL	285.3	204.8	80.5	8.153	8	8	9.874
AAV vs. ASO1	285.3	261	24.25	16.21	8	8	1.496
AAV vs. ASO2	285.3	222.1	63.13	9.815	8	8	6.431
Row 5
AAV vs. CTRL	226.4	181.6	44.75	9.763	8	8	4.584
AAV vs. ASO1	226.4	219.6	6.75	13.2	8	8	0.5112
AAV vs. ASO2	226.4	195.3	31.13	9.945	8	8	3.13
Row 6
AAV vs. CTRL	173.5	147.5	26	6.464	8	8	4.022
AAV vs. ASO1	173.5	164.4	9.125	9.729	8	8	0.9379
AAV vs. ASO2	173.5	179.8	-6.25	5.637	8	8	1.109
raw data-AUC
CTRL	AAV	ASO1	ASO2
943.5	1145	1197	995.5
869	1124	1009	1017
998.5	1159	987.5	985
1015	1182	1001	1053
921.5	1234	1047	998
890	1123	1097	967
907	1199	1048	968
900	1167	1043	993.5
two-way ANOVA-AUC
Compare column means (main column effect)
Number of families	1
Number of comparisons per family	3
Alpha	0.05
Dunnett's multiple comparisons test	Mean Diff.	95.00% CI of diff.	Below threshold?	Summary	Adjusted P Value
AAV vs. CTRL	236.1	172.9 to 299.2	Yes	***	<.001
AAV vs. ASO1	112.9	49.81 to 176.1	Yes	***	<.001
AAV vs. ASO2	169.5	106.4 to 232.6	Yes	***	<.001
Test details	Mean 1	Mean 2	Mean Diff.	SE of diff.	N1	N2	q	DF
AAV vs. CTRL	1167	930.6	236.1	24.94	8	8	9.465	21
AAV vs. ASO1	1167	1054	112.9	24.94	8	8	4.528	21
AAV vs. ASO2	1167	997.1	169.5	24.94	8	8	6.796	21

[truncated: 1 more sheets: Figure 3L]
