# Supplementary material for: Amelioration of non-alcoholic fatty liver disease by targeting adhesion G protein-coupled receptor F1 (Adgrf1)
Source: eLife journal article supplement (doi:10.7554/elife.85131), 2023-08-02
Supplement: fig3-figsupp1-data1 [file Supplementary Figure 3-Source 1.xlsx]

## Sheet: S Fig2B
raw data
	CTRL																	ASO2
Liver	0.896577	1.4871	0.54431	1.37793	0.999978	1.30561	1.1865	0.915271
Kidney	0.81	1.26	0.95	1.42	1.05254	1.41881	0.595171	0.497434
	ASO1
Liver	0.065494	0.029107	0.061108	0.063482	0.023933	0.020557	0.028529	0.023919
Kidney	0.89	1.12	0.73	0.88	0.85753	0.635456	0.721822	0.413912
	ASO2
Liver	0.079351	0.023512	0.0312856	0.012504	0.025729	0.0299	0.031923	0.015162
Kidney	1.10126	1.02125	0.83165	1.1988	0.909827	0.486658	0.634273	0.90324
two-way ANOVA
Within each row, compare columns (simple effects within rows)
Number of families	2
Number of comparisons per family	2
Alpha	0.05
Dunnett's multiple comparisons test	Mean Diff.	95.00% CI of diff.	Below threshold?	Summary	Adjusted P Value
Liver
CTRL-STC vs. ASO1	1.05	0.7849 to 1.314	Yes	***	<.001
CTRL-STC vs. ASO2	1.058	0.7933 to 1.323	Yes	***	<.001
Kidney
CTRL-STC vs. ASO1	0.2194	-0.04530 to 0.4841	No	ns	0.115
CTRL-STC vs. ASO2	0.1146	-0.1501 to 0.3793	No	ns	0.513
Test details	Mean 1	Mean 2	Mean Diff.	SE of diff.	N1	N2	q	DF
Liver
CTRL-STC vs. ASO1	1.089	0.03952	1.05	0.1156	8	8	9.076	42
CTRL-STC vs. ASO2	1.089	0.03117	1.058	0.1156	8	8	9.148	42
Kidney
CTRL-STC vs. ASO1	1	0.7811	0.2194	0.1156	8	8	1.897	42
CTRL-STC vs. ASO2	1	0.8859	0.1146	0.1156	8	8	0.9912	42

## Sheet: S Fig2C
raw data
	CTRL-STC
Liver	1.2	1.1708	0.763712
Kidney	1	0.93813	1.02125
	ASO1
Liver	0.212792	0.246173	0.133557
Kidney	0.93811	1.02153	0.931941
	ASO2
Liver	0.165392	0.062375	0.08321
Kidney	0.97012	0.78314	1.10515
two-way ANOVA
Within each row, compare columns (simple effects within rows)
Number of families	2
Number of comparisons per family	2
Alpha	0.05
Dunnett's multiple comparisons test	Mean Diff.	95.00% CI of diff.	Below threshold?	Summary	Adjusted P Value
Liver
CTRL-STC vs. ASO1	0.8473	0.2509 to 1.444	Yes	*	0.025
CTRL-STC vs. ASO2	0.9412	0.2256 to 1.657	Yes	*	0.03
Kidney
CTRL-STC vs. ASO1	0.0226	-0.2677 to 0.3129	No	ns	0.887
CTRL-STC vs. ASO2	0.03366	-0.3401 to 0.4074	No	ns	0.855
Test details	Mean 1	Mean 2	Mean Diff.	SE of diff.	N1	N2	q	DF
Liver
CTRL-STC vs. ASO1	1.045	0.1975	0.8473	0.1101	3	3	7.697	2
CTRL-STC vs. ASO2	1.045	0.1037	0.9412	0.1321	3	3	7.126	2
Kidney
CTRL-STC vs. ASO1	0.9865	0.9639	0.0226	0.05359	3	3	0.4217	2

## Sheet: S Fig2D
raw data
weeks	CTRL
2	17	20	19	18.9	20.5	18.9	20	19.7
4	18	21	19	18	20.1	19.6	20.4	19.3
6	19	21	20	19.8	19.6	18.9	18.8	18.1
8	20	20	21	22.4	21.1	21.5	21.9	21.7
10	20	22	20	21.7	20.1	21.8	22.7	22.7
12	21	22	22	20	21.4	22.9	20.2	22.6
	ASO1
2	19	17	18	18.4	17.5	18.5	21	21.7
4	21	18	19	19	17.3	17.3	20.6	22.8
6	20	19	19	18.9	20.1	18.3	22.5	18.3
8	21	20	20	19.3	19.3	20.8	20.8	22.4
10	22	21	21	22.1	23	21.9	20.8	22.2
12	22	23	22	21.3	22.5	20	21.4	21.9
	ASO2
2	20	17	18	16.3	16.1	19.3	16	18.8
4	21	18	19	20.3	19.1	20.8	22	22
6	22	18	19	18.3	21.9	19.9	20.4	18.9
8	22	19	20	22.3	21.5	20	23.9	20.7
10	22	20	21	22	23.8	22	20.8	21.6
12	23	21	21	20.9	20.9	22.5	20.5	22.1
two-way ANOVA
Within each row, compare columns (simple effects within rows)
Number of families	6
Number of comparisons per family	2
Alpha	0.05
Dunnett's multiple comparisons test	Mean Diff.	95.00% CI of diff.	Below threshold?	Summary	Adjusted P Value
2
CTRL vs. ASO1	0.3625	-1.383 to 2.108	No	ns	0.826
CTRL vs. ASO2	1.563	-0.1113 to 3.236	No	ns	0.067
4
CTRL vs. ASO1	0.05	-1.949 to 2.049	No	ns	0.997
CTRL vs. ASO2	-0.85	-2.443 to 0.7433	No	ns	0.341
6
CTRL vs. ASO1	-0.1125	-1.568 to 1.343	No	ns	0.973
CTRL vs. ASO2	-0.4	-1.987 to 1.187	No	ns	0.755
8
CTRL vs. ASO1	0.75	-0.4194 to 1.919	No	ns	0.231
CTRL vs. ASO2	0.025	-1.579 to 1.629	No	ns	0.999
10
CTRL vs. ASO1	-0.375	-1.608 to 0.8584	No	ns	0.674
CTRL vs. ASO2	-0.275	-1.686 to 1.136	No	ns	0.849
12
CTRL vs. ASO1	-0.25	-1.461 to 0.9612	No	ns	0.832
CTRL vs. ASO2	0.025	-1.193 to 1.243	No	ns	0.998
Test details	Mean 1	Mean 2	Mean Diff.	SE of diff.	N1	N2	q	DF
2
CTRL vs. ASO1	19.25	18.89	0.3625	0.6983	8	8	0.5191	12.11
CTRL vs. ASO2	19.25	17.69	1.563	0.6723	8	8	2.324	12.49
4
CTRL vs. ASO1	19.43	19.38	0.05	0.7886	8	8	0.0634	10.92
CTRL vs. ASO2	19.43	20.28	-0.85	0.6424	8	8	1.323	12.9
6
CTRL vs. ASO1	19.4	19.51	-0.1125	0.5814	8	8	0.1935	11.98
CTRL vs. ASO2	19.4	19.8	-0.4	0.6288	8	8	0.6362	11.24
8
CTRL vs. ASO1	21.2	20.45	0.75	0.4743	8	8	1.581	13.59
CTRL vs. ASO2	21.2	21.18	0.025	0.6324	8	8	0.03953	10.88
10
CTRL vs. ASO1	21.38	21.75	-0.375	0.4927	8	8	0.7611	11.97
CTRL vs. ASO2	21.38	21.65	-0.275	0.5741	8	8	0.479	13.98
12
CTRL vs. ASO1	21.51	21.76	-0.25	0.4915	8	8	0.5087	13.64
CTRL vs. ASO2	21.51	21.49	0.025	0.4946	8	8	0.05055	13.7

## Sheet: S Fig2E
raw data
weeks	CTRL
2	91	93	84	94.1	95.4	92	86.3	98.3
4	83	90	91	90.9	92.5	93.1	96.9	96.9
6	89	88	91	96.1	88.7	91.1	87.3	90.4
8	87	90	84	97.3	100	87.9	89.6	87
10	92	89	83	90	97	100	89.4	95.7
12	95	92	88	98.1	96.2	87.6	98.4	88.6
	ASO1
2	86	91	88	94.7	91.8	94.6	92.7	90.7
4	89	95	81	90.7	86.7	88.2	87.4	86.8
6	89	92	91	96.5	95	98.4	96.7	96.8
8	91	86	90	87.2	96.8	94.3	94.1	91.1
10	88	84	92	94.7	87.9	88.8	93	92.9
12	87	96	90	96.3	88.5	86.8	96.1	96.3
	ASO2
2	86	91	91	92.2	86.5	88.9	86.6	91
4	81	87	92	91.1	97.2	89.7	93.8	92.2
6	91	90	87	90.9	88.9	97.7	93.4	87.4
8	92	83	90	94	98.8	95.5	98.8	88.5
10	82	94	88	89.1	93.9	89.8	96.4	92.9
12	98	86	91	89.6	86	86.5	98.3	90.4
two-way ANOVA
Within each row, compare columns (simple effects within rows)
Number of families	6
Number of comparisons per family	2
Alpha	0.05
Dunnett's multiple comparisons test	Mean Diff.	95.00% CI of diff.	Below threshold?	Summary	Adjusted P Value
2
CTRL vs. ASO1	0.575	-4.361 to 5.511	No	ns	0.94
CTRL vs. ASO2	2.613	-2.157 to 7.382	No	ns	0.315
4
CTRL vs. ASO1	3.688	-1.470 to 8.845	No	ns	0.173
CTRL vs. ASO2	1.287	-4.412 to 6.987	No	ns	0.804
6
CTRL vs. ASO1	-2.1	-6.151 to 1.951	No	ns	0.363
CTRL vs. ASO2	0.2875	-3.741 to 4.316	No	ns	0.978
8
CTRL vs. ASO1	-0.9625	-6.788 to 4.863	No	ns	0.885
CTRL vs. ASO2	-2.225	-8.908 to 4.458	No	ns	0.635
10
CTRL vs. ASO1	1.85	-3.861 to 7.561	No	ns	0.642
CTRL vs. ASO2	1.25	-4.896 to 7.396	No	ns	0.836
12
CTRL vs. ASO1	0.8625	-4.650 to 6.375	No	ns	0.899
CTRL vs. ASO2	2.263	-3.600 to 8.125	No	ns	0.551
Test details	Mean 1	Mean 2	Mean Diff.	SE of diff.	N1	N2	q	DF
2
CTRL vs. ASO1	91.76	91.19	0.575	1.972	8	8	0.2916	11.97
CTRL vs. ASO2	91.76	89.15	2.613	1.875	8	8	1.394	10.64
4
CTRL vs. ASO1	91.79	88.1	3.688	2.096	8	8	1.759	13.84
CTRL vs. ASO2	91.79	90.5	1.287	2.317	8	8	0.5556	13.88
6
CTRL vs. ASO1	91.08	93.18	-2.1	1.645	8	8	1.276	13.74
CTRL vs. ASO2	91.08	90.79	0.2875	1.637	8	8	0.1757	13.77
8
CTRL vs. ASO1	90.35	91.31	-0.9625	2.333	8	8	0.4126	12.2
CTRL vs. ASO2	90.35	92.58	-2.225	2.72	8	8	0.8181	14
10
CTRL vs. ASO1	92.01	90.16	1.85	2.286	8	8	0.8094	12.15
CTRL vs. ASO2	92.01	90.76	1.25	2.494	8	8	0.5013	13.61
12
CTRL vs. ASO1	92.99	92.13	0.8625	2.244	8	8	0.3844	13.99
CTRL vs. ASO2	92.99	90.73	2.263	2.384	8	8	0.9492	13.87

## Sheet: S Fig2F
raw data
CTRL
0.32631	0.42351	0.34236	0.379821	0.267748	0.215886	0.501974	0.251268
ASO1
0.322528	0.35588	0.424588	0.544005	0.22003	0.025963	0.0642664	0.123758
ASO2
0.492151	0.641972	0.0947772	0.0946567	0.0926663	0.146129	0.086753	0.128744
one-way ANOVA
Number of families	1
Number of comparisons per family	2
Alpha	0.05
Dunnett's multiple comparisons test	Mean Diff.	95.00% CI of diff.	Below threshold?	Summary	Adjusted P Value	B-?
CTRL vs. ASO1	0.07848	-0.1266 to 0.2836	No	ns	0.573	A	ASO1
CTRL vs. ASO2	0.1164	-0.08871 to 0.3215	No	ns	0.32	C	ASO2
Test details	Mean 1	Mean 2	Mean Diff.	SE of diff.	n1	n2	q	DF
CTRL vs. ASO1	0.3386	0.2601	0.07848	0.08652	8	8	0.9071	21
CTRL vs. ASO2	0.3386	0.2222	0.1164	0.08652	8	8	1.345	21

## Sheet: S Fig2G
raw data
CTRL
2.65253	3.35075	2.2248	1.49472	2.06261	2.80924	2.31516	2.02847
ASO1
1.11195	1.93826	2.27668	2.17542	1.31533	1.79306	2.36679	2.09857
ASO2
1.37023	2.06633	1.76751	2.6579	1.28166	2.51268	1.65761	2.81324
one-way ANOVA
Number of families	1
Number of comparisons per family	2
Alpha	0.05
Dunnett's multiple comparisons test	Mean Diff.	95.00% CI of diff.	Below threshold?	Summary	Adjusted P Value	A-?
CTRL vs. ASO1	0.4828	-0.1575 to 1.123	No	ns	0.154	B	ASO1
CTRL vs. ASO2	0.3514	-0.2888 to 0.9916	No	ns	0.341	C	ASO2
Test details	Mean 1	Mean 2	Mean Diff.	SE of diff.	n1	n2	q	DF
CTRL vs. ASO1	2.367	1.885	0.4828	0.2701	8	8	1.787	21
CTRL vs. ASO2	2.367	2.016	0.3514	0.2701	8	8	1.301	21

## Sheet: S Fig2H
raw data-curve
min	CTRL
0	76	92	82	76	70	89	76	77
15	145	138	148	149	143	130	140	151
30	175	178	164	165	170	177	162	189
60	168	122	177	180	159	178	171	164
90	124	109	149	120	122	122	137	121
120	106	104	115	115	126	106	130	103
	ASO1
0	87	76	68	76	76	74	83	85
15	167	130	139	165	147	167	142	170
30	192	168	165	203	161	194	189	179
60	158	165	153	187	173	162	166	185
90	121	111	121	141	137	140	116	145
120	103	117	112	133	105	118	103	124
	ASO2
0	85	83	72	69	71	70	73	70
15	148	139	152	131	149	143	137	130
30	184	189	193	180	179	174	193	170
60	163	152	144	161	155	152	158	152
90	142	133	126	126	137	117	131	117
120	112	109	101	92	99	102	112	126
two-way ANOVA-curve
Within each row, compare columns (simple effects within rows)
Number of families	6
Number of comparisons per family	2
Alpha	0.05
Dunnett's multiple comparisons test	Mean Diff.	95.00% CI of diff.	Below threshold?	Summary	Adjusted P Value
Row 1
CTRL vs. ASO1	1.625	-9.565 to 12.81	No	ns	0.892
CTRL vs. ASO2	5.625	-2.414 to 13.66	No	ns	0.162
Row 2
CTRL vs. ASO1	-10.38	-25.86 to 5.113	No	ns	0.181
CTRL vs. ASO2	1.875	-9.619 to 13.37	No	ns	0.867
Row 3
CTRL vs. ASO1	-8.875	-26.90 to 9.152	No	ns	0.349
CTRL vs. ASO2	-10.25	-26.02 to 5.522	No	ns	0.196
Row 4
CTRL vs. ASO1	-3.75	-25.13 to 17.63	No	ns	0.849
CTRL vs. ASO2	10.25	-8.282 to 28.78	No	ns	0.281
Row 5
CTRL vs. ASO1	-3.5	-22.63 to 15.63	No	ns	0.837
CTRL vs. ASO2	-3.125	-18.24 to 11.99	No	ns	0.799
Row 6
CTRL vs. ASO1	-1.25	-18.71 to 16.21	No	ns	0.972
CTRL vs. ASO2	6.5	-10.13 to 23.13	No	ns	0.49
Test details	Mean 1	Mean 2	Mean Diff.	SE of diff.	N1	N2	q	DF
Row 1
CTRL vs. ASO1	79.75	78.13	1.625	4.066	8	8	0.3996	7
CTRL vs. ASO2	79.75	74.13	5.625	2.921	8	8	1.926	7
Row 2
CTRL vs. ASO1	143	153.4	-10.38	5.628	8	8	1.843	7
CTRL vs. ASO2	143	141.1	1.875	4.177	8	8	0.4489	7
Row 3
CTRL vs. ASO1	172.5	181.4	-8.875	6.55	8	8	1.355	7
CTRL vs. ASO2	172.5	182.8	-10.25	5.731	8	8	1.788	7
Row 4
CTRL vs. ASO1	164.9	168.6	-3.75	7.768	8	8	0.4827	7
CTRL vs. ASO2	164.9	154.6	10.25	6.734	8	8	1.522	7
Row 5
CTRL vs. ASO1	125.5	129	-3.5	6.951	8	8	0.5035	7
CTRL vs. ASO2	125.5	128.6	-3.125	5.492	8	8	0.569	7
Row 6
CTRL vs. ASO1	113.1	114.4	-1.25	6.344	8	8	0.197	7
CTRL vs. ASO2	113.1	106.6	6.5	6.044	8	8	1.075	7
raw data-AUC
Total Area	CTRL	ASO2
733	703	735.5
670.5	645	709
668	736.5	701.5
800.5	709.5	678.5
708.5	692	705
759	704.5	672
706	713	711.5
783.5	715	667
two-way ANOVA
Compare column means (main column effect)
Number of families	1
Number of comparisons per family	2
Alpha	0.05
Dunnett's multiple comparisons test	Mean Diff.	95.00% CI of diff.	Below threshold?	Summary	Adjusted P Value
CTRL vs. Total Area	-26.31	-72.20 to 19.57	No	ns	0.299
CTRL vs. ASO2	4.813	-41.07 to 50.70	No	ns	0.953
Test details	Mean 1	Mean 2	Mean Diff.	SE of diff.	N1	N2	q	DF
CTRL vs. Total Area	702.3	728.6	-26.31	18.67	8	8	1.409	14
CTRL vs. ASO2	702.3	697.5	4.813	18.67	8	8	0.2577	14

## Sheet: S Fig2I
raw data-curve
min	CTRL
0	98	93	108	108	96	110	84	97
15	189	195	221	237	204	194	201	197
30	198	190	175	177	153	179	169	190
60	115	124	158	121	134	133	139	117
90	116	108	108	109	86	96	97	104
120	94	101	98	74	97	87	88	93
	ASO1
0	91	86	102	103	83	96	95	96
15	218	238	228	202	236	190	228	210
30	174	169	173	156	151	163	184	174
60	129	112	136	124	131	125	131	122
90	113	98	92	112	108	84	81	89
120	93	88	82	94	82	87	79	91
	ASO2
0	92	89	91	97	80	83	107	106
15	224	219	232	235	191	210	210	222
30	182	185	172	188	173	184	159	165
60	145	149	121	155	154	130	110	140
90	125	120	119	112	90	118	91	93
120	92	94	81	93	97	72	71	70
two-way ANOVA-curve
Within each row, compare columns (simple effects within rows)
Number of families	6
Number of comparisons per family	3
Alpha	0.05
Tukey's multiple comparisons test	Mean Diff.	95.00% CI of diff.	Below threshold?	Summary	Adjusted P Value
Row 1
aso1 vs. ctrl	-5.25	-15.84 to 5.339	No	ns	0.416
aso1 vs. aso2	0.875	-10.42 to 12.17	No	ns	0.977
ctrl vs. aso2	6.125	-6.145 to 18.39	No	ns	0.414
Row 2
aso1 vs. ctrl	14	-7.738 to 35.74	No	ns	0.245
aso1 vs. aso2	0.875	-19.65 to 21.40	No	ns	0.993
ctrl vs. aso2	-13.13	-33.05 to 6.802	No	ns	0.23
Row 3
aso1 vs. ctrl	-10.88	-27.45 to 5.703	No	ns	0.231
aso1 vs. aso2	-8	-21.87 to 5.869	No	ns	0.316
ctrl vs. aso2	2.875	-13.54 to 19.29	No	ns	0.89
Row 4
aso1 vs. ctrl	-3.875	-19.19 to 11.44	No	ns	0.775
aso1 vs. aso2	-11.75	-29.14 to 5.636	No	ns	0.201
ctrl vs. aso2	-7.875	-27.88 to 12.13	No	ns	0.57
Row 5
aso1 vs. ctrl	-5.875	-20.62 to 8.874	No	ns	0.559
aso1 vs. aso2	-11.38	-29.33 to 6.582	No	ns	0.254
ctrl vs. aso2	-5.5	-21.98 to 10.98	No	ns	0.656
Row 6
aso1 vs. ctrl	-4.5	-14.10 to 5.103	No	ns	0.448
aso1 vs. aso2	3.25	-9.143 to 15.64	No	ns	0.759
ctrl vs. aso2	7.75	-5.660 to 21.16	No	ns	0.311
Test details	Mean 1	Mean 2	Mean Diff.	SE of diff.	N1	N2	q	DF
Row 1
aso1 vs. ctrl	94	99.25	-5.25	4.021	8	8	1.846	13.29
aso1 vs. aso2	94	93.13	0.875	4.265	8	8	0.2901	12.72
ctrl vs. aso2	99.25	93.13	6.125	4.684	8	8	1.849	13.88
Row 2
aso1 vs. ctrl	218.8	204.8	14	8.303	8	8	2.384	13.97
aso1 vs. aso2	218.8	217.9	0.875	7.813	8	8	0.1584	13.54
ctrl vs. aso2	204.8	217.9	-13.13	7.597	8	8	2.443	13.74
Row 3
aso1 vs. ctrl	168	178.9	-10.88	6.283	8	8	2.448	13.08
aso1 vs. aso2	168	176	-8	5.298	8	8	2.135	13.98
ctrl vs. aso2	178.9	176	2.875	6.209	8	8	0.6548	12.87
Row 4
aso1 vs. ctrl	126.3	130.1	-3.875	5.632	8	8	0.973	10.5
aso1 vs. aso2	126.3	138	-11.75	6.313	8	8	2.632	9.721
ctrl vs. aso2	130.1	138	-7.875	7.626	8	8	1.46	13.73
Row 5
aso1 vs. ctrl	97.13	103	-5.875	5.585	8	8	1.488	12.99
aso1 vs. aso2	97.13	108.5	-11.38	6.844	8	8	2.351	13.7
ctrl vs. aso2	103	108.5	-5.5	6.176	8	8	1.259	11.98
Row 6
aso1 vs. ctrl	87	91.5	-4.5	3.601	8	8	1.767	12.03
aso1 vs. aso2	87	83.75	3.25	4.527	8	8	1.015	10.08
ctrl vs. aso2	91.5	83.75	7.75	5.074	8	8	2.16	12.9
raw data-AUC
ASO1	CTRL	ASO2
726	714	768
704	714	764.5
691	765	760
682.5	735	785
708.5	679.5	657.5
643.5	700.5	719.5
698	692	659
688.5	703	708
two-way ANOVA
Compare column means (main column effect)
Number of families	1
Number of comparisons per family	3
Alpha	0.05
Tukey's multiple comparisons test	Mean Diff.	95.00% CI of diff.	Below threshold?	Summary	Adjusted P Value
ASO1 vs. CTRL	-20.13	-59.99 to 19.74	No	ns	0.407
ASO1 vs. ASO2	-34.94	-74.80 to 4.926	No	ns	0.09
CTRL vs. ASO2	-14.81	-54.68 to 25.05	No	ns	0.605
Test details	Mean 1	Mean 2	Mean Diff.	SE of diff.	N1	N2	q	DF
ASO1 vs. CTRL	692.8	712.9	-20.13	15.23	8	8	1.869	14
ASO1 vs. ASO2	692.8	727.7	-34.94	15.23	8	8	3.244	14
CTRL vs. ASO2	712.9	727.7	-14.81	15.23	8	8	1.375	14

## Sheet: S Fig2J
raw data-curve
min	CTRL
0	87.4	88	79	83	76.4	75.3	84.7	81.4
15	56.6	66.7	69	61	65.6	62.9	52.7	59.4
30	54.9	57.4	49	41	51.9	47.5	42	56.4
60	67.1	68	83	64	67.9	60.9	64.5	67
90	76.3	91	88	82	70.9	86.7	89.9	83
120	106.3	84	96	91	96.7	100	92.2	109.6
	ASO1
0	88	84	71	94	83	88.2	89	82.7
15	63	69	58	72	52.9	55.8	68	69.6
30	49	51	42	57	58.7	48.5	43.9	44.2
60	62	70	64	77	67.9	60.9	64.5	67
90	71	83	89	83	73.4	79.3	89.4	86.5
120	92	101	91	92	97.3	105	99.7	90
	ASO2
0	89.7	82	88	83.6	89	78.9	79.4	84.6
15	79	64	71	58.5	50.2	61.4	57.4	54.4
30	66	58	50	56	50.3	41.5	58.3	58.2
60	67.1	69	73	68.1	69.5	65.2	62.7	63.4
90	92	81	84	88.1	74.3	80.3	70	74.4
120	98	90	93	99.8	107.8	95.1	96.9	102
two-way ANOVA-curve
Within each row, compare columns (simple effects within rows)
Number of families	6
Number of comparisons per family	2
Alpha	0.05
Dunnett's multiple comparisons test	Mean Diff.	95.00% CI of diff.	Below threshold?	Summary	Adjusted P Value
Row 1
CTRL vs. ASO1	-3.087	-10.02 to 3.844	No	ns	0.41
CTRL vs. ASO2	-2.5	-8.683 to 3.683	No	ns	0.47
Row 2
CTRL vs. ASO1	-1.8	-12.28 to 8.680	No	ns	0.854
CTRL vs. ASO2	-0.25	-10.69 to 10.19	No	ns	0.997
Row 3
CTRL vs. ASO1	0.725	-8.103 to 9.553	No	ns	0.963
CTRL vs. ASO2	-4.775	-12.79 to 3.237	No	ns	0.24
Row 4
CTRL vs. ASO1	1.138	-7.484 to 9.759	No	ns	0.91
CTRL vs. ASO2	0.55	-3.993 to 5.093	No	ns	0.923
Row 5
CTRL vs. ASO1	1.65	-2.791 to 6.091	No	ns	0.521
CTRL vs. ASO2	2.962	-7.771 to 13.70	No	ns	0.681
Row 6
CTRL vs. ASO1	0.975	-10.52 to 12.47	No	ns	0.961
CTRL vs. ASO2	-0.85	-8.320 to 6.620	No	ns	0.932
Test details	Mean 1	Mean 2	Mean Diff.	SE of diff.	N1	N2	q	DF
Row 1
CTRL vs. ASO1	81.9	84.99	-3.087	2.519	8	8	1.226	7
CTRL vs. ASO2	81.9	84.4	-2.5	2.247	8	8	1.113	7
Row 2
CTRL vs. ASO1	61.74	63.54	-1.8	3.808	8	8	0.4727	7
CTRL vs. ASO2	61.74	61.99	-0.25	3.792	8	8	0.06593	7
Row 3
CTRL vs. ASO1	50.01	49.29	0.725	3.208	8	8	0.226	7
CTRL vs. ASO2	50.01	54.79	-4.775	2.911	8	8	1.64	7
Row 4
CTRL vs. ASO1	67.8	66.66	1.138	3.133	8	8	0.3631	7
CTRL vs. ASO2	67.8	67.25	0.55	1.651	8	8	0.3331	7
Row 5
CTRL vs. ASO1	83.48	81.83	1.65	1.614	8	8	1.023	7
CTRL vs. ASO2	83.48	80.51	2.962	3.901	8	8	0.7595	7
Row 6
CTRL vs. ASO1	96.98	96	0.975	4.178	8	8	0.2333	7
CTRL vs. ASO2	96.98	97.83	-0.85	2.714	8	8	0.3131	7
raw data-AUC
ASO1	CTRL	ASO2
335	374	409.5
365.5	376.5	358
334	335	368.5
382	358	378
377.5	337	367.5
377	365.5	380.5
332	371	364.5
347.5	358	376
two-way ANOVA
Compare column means (main column effect)
Number of families	1
Number of comparisons per family	2
Alpha	0.05
Dunnett's multiple comparisons test	Mean Diff.	95.00% CI of diff.	Below threshold?	Summary	Adjusted P Value
CTRL vs. ASO1	3.063	-19.42 to 25.55	No	ns	0.922
CTRL vs. ASO2	-15.94	-38.42 to 6.547	No	ns	0.178
Test details	Mean 1	Mean 2	Mean Diff.	SE of diff.	N1	N2	q	DF
CTRL vs. ASO1	359.4	356.3	3.063	9.151	8	8	0.3347	14
CTRL vs. ASO2	359.4	375.3	-15.94	9.151	8	8	1.742	14
