# Supplementary material for: Amelioration of non-alcoholic fatty liver disease by targeting adhesion G protein-coupled receptor F1 (Adgrf1)
Source: eLife journal article supplement (doi:10.7554/elife.85131), 2023-08-02
Supplement: fig4-data1 [file Figure 4-Source 1.xlsx]

## Sheet: Figure 4A
raw data
CTRL
131.33	153.83	157.17	146.38	148.27	138.32	153.18	126.58
110 AAV
241.33	247.17	223	236.8	231.29	234.88	252.5	248.12
ASO
207.17	187.17	203.83	194.52	200.43	203.12	203.49	194.38
aso2
179.62	185.93	174.6	195.2	183.34	188.53	172.69	178.09
one-way ANOVA
Number of families	1
Number of comparisons per family	3
Alpha	0.05
Dunnett's multiple comparisons test	Mean Diff.	95.00% CI of diff.	Below threshold?	Summary	Adjusted P Value	B-?
110 AAV vs. CTRL	95	77.39 to 112.6	Yes	***	<.001	A	CTRL
110 AAV vs. ASO	40.12	25.84 to 54.41	Yes	***	<.001	C	ASO
110 AAV vs. aso2	57.14	43.18 to 71.10	Yes	***	<.001	D	aso2
Test details	Mean 1	Mean 2	Mean Diff.	SE of diff.	n1	n2	q	DF
110 AAV vs. CTRL	239.4	144.4	95	5.929	8	8	16.02	7
110 AAV vs. ASO	239.4	199.3	40.12	4.808	8	8	8.345	7
110 AAV vs. aso2	239.4	182.3	57.14	4.699	8	8	12.16	7

## Sheet: Figure 4B
raw data
CTRL
108.75	104.33	109.25	112.05	71.13	109.99	103.65	102.27
AAV
206.21	175.81	161.54	175.31	151.57	184.12	185.68	165.98
ASO1
102.49	108.4	113.96	125.56	126.74	124.85	122.96	118.4
ASO2
121.09	132.99	112.51	115.54	104.85	112.61	129.87	124.7
one-way ANOVA
Number of families	1
Number of comparisons per family	3
Alpha	0.05
Dunnett's multiple comparisons test	Mean Diff.	95.00% CI of diff.	Below threshold?	Summary	Adjusted P Value	B-?
AAV vs. ASO1	57.86	34.08 to 81.64	Yes	***	<.001	A	ASO1
AAV vs. CTRL	73.1	58.52 to 87.68	Yes	***	<.001	C	CTRL
AAV vs. ASO2	56.51	40.50 to 72.52	Yes	***	<.001	D	ASO2
Test details	Mean 1	Mean 2	Mean Diff.	SE of diff.	n1	n2	q	DF
AAV vs. ASO1	175.8	117.9	57.86	8.005	8	8	7.228	7
AAV vs. CTRL	175.8	102.7	73.1	4.908	8	8	14.9	7
AAV vs. ASO2	175.8	119.3	56.51	5.388	8	8	10.49	7

## Sheet: Figure 4C
raw data
CTRL
443.355	411.433	431.167	470.633	399.826	419.296	420.129	418.398
AAV
452.06	463.668	459.605	464.29	468.13	463.913	413.608	439.139
ASO1
431.747	447.998	444.515	446.837	436.938	452.498	435.498	441.193
ASO2
443.391	441.673	429.584	439.33	439.129	442.595	431.998	433.955
one-way ANOVA
Number of families	1
Number of comparisons per family	3
Alpha	0.05
Dunnett's multiple comparisons test	Mean Diff.	95.00% CI of diff.	Below threshold?	Summary	Adjusted P Value	B-?
aav vs. ctrl	26.27	-2.522 to 55.07	No	ns	0.072	A	ctrl
aav vs. aso	10.9	-6.070 to 27.87	No	ns	0.217	C	aso
aav vs. aso2	15.34	-1.778 to 32.47	No	ns	0.077	D	aso2
Test details	Mean 1	Mean 2	Mean Diff.	SE of diff.	n1	n2	q	DF
aav vs. ctrl	453.1	426.8	26.27	9.692	8	8	2.711	7
aav vs. aso	453.1	442.2	10.9	5.712	8	8	1.908	7
aav vs. aso2	453.1	437.7	15.34	5.763	8	8	2.663	7

## Sheet: Figure 4D
raw data
	CTRL
HDL	67.7431	70.5657	49.1137	69.4366	65.485	64	68	70
LDL	18.1761	19.396	16.9563	14.5165	6.58732	16	11	17
	AAV
HDL	51.3718	47.4201	39.3553	38.5	41.1	36.9	40.2	46
LDL	27.9351	37.0842	23.0556	35	38	29	31	34
	ASO1
HDL	69.4366	55.3235	62.0978	55.888	68.55	64.97	58.44	59.18
LDL	32.2047	32.2047	35.2544	17.5662	23.07	20.48	25.14	20.92
	ASO2
HDL	56	57.2	54.8	61.4	61.72	59.22	61.29	59.54
LDL	33	31	30	28	25.23	28.27	29.71	21.98
two-way ANOVA
Within each row, compare columns (simple effects within rows)
Number of families	2
Number of comparisons per family	3
Alpha	0.05
Dunnett's multiple comparisons test	Mean Diff.	95.00% CI of diff.	Below threshold?	Summary	Adjusted P Value
HDL
AAV vs. ASO1	-19.13	-26.33 to -11.93	Yes	***	<.001
AAV vs. CTRL	-22.94	-30.09 to -15.78	Yes	***	<.001
AAV vs. ASO2	-16.29	-23.26 to -9.317	Yes	***	<.001
LDL
AAV vs. ASO1	6.029	-4.511 to 16.57	No	ns	0.287
AAV vs. CTRL	16.93	8.828 to 25.03	Yes	**	0.001
AAV vs. ASO2	3.486	-4.176 to 11.15	No	ns	0.443
Test details	Mean 1	Mean 2	Mean Diff.	SE of diff.	N1	N2	q	DF
HDL
AAV vs. ASO1	42.61	61.74	-19.13	2.422	8	8	7.897	7
AAV vs. CTRL	42.61	65.54	-22.94	2.409	8	8	9.521	7
AAV vs. ASO2	42.61	58.9	-16.29	2.347	8	8	6.941	7
LDL
AAV vs. ASO1	31.88	25.85	6.029	3.548	8	8	1.699	7
AAV vs. CTRL	31.88	14.95	16.93	2.727	8	8	6.208	7
AAV vs. ASO2	31.88	28.4	3.486	2.579	8	8	1.352	7

## Sheet: Figure 4E
raw data
	CTRL
AST	141.823	140.633	148.252	133.887	153.411	140.36	146.06	135.72
ALT	95.633	72.459	95.157	97.776	101.744	98.34	96.59	99.21
	AAV
AST	204.045	236.346	227.346	217.8	225.69	222.76	226.53	223.48
ALT	119.601	146.664	157.14	135	148	144.3	149.65	147
	ASO
AST	160.792	159.935	146.982	169.03	155.61	158.45	156.9	158.98
ALT	123.093	99.522	91.665	107.379	104.06	95.25	96.2	100.07
	ASO2
AST	158.3	155.9	164.2	169.5	158.83	153.75	156.26	153.44
ALT	109.601	108	95.4	97	100.63	98.39	107.02	103.58
two-way ANOVA
Within each row, compare columns (simple effects within rows)
Number of families	2
Number of comparisons per family	3
Alpha	0.05
Dunnett's multiple comparisons test	Mean Diff.	95.00% CI of diff.	Below threshold?	Summary	Adjusted P Value
AST
AAV vs. ASO	64.66	51.20 to 78.13	Yes	***	<.001
AAV vs. CTRL AAV	80.48	69.95 to 91.01	Yes	***	<.001
AAV vs. aso2	64.23	51.93 to 76.53	Yes	***	<.001
ALT
AAV vs. ASO	41.26	19.31 to 63.22	Yes	**	0.002
AAV vs. CTRL AAV	48.81	32.91 to 64.70	Yes	***	<.001
AAV vs. aso2	40.97	25.70 to 56.23	Yes	***	<.001
Test details	Mean 1	Mean 2	Mean Diff.	SE of diff.	N1	N2	q	DF
AST
AAV vs. ASO	223	158.3	64.66	4.531	8	8	14.27	7
AAV vs. CTRL AAV	223	142.5	80.48	3.543	8	8	22.71	7
AAV vs. aso2	223	158.8	64.23	4.14	8	8	15.52	7
ALT
AAV vs. ASO	143.4	102.2	41.26	7.39	8	8	5.584	7
AAV vs. CTRL AAV	143.4	94.61	48.81	5.351	8	8	9.121	7
AAV vs. aso2	143.4	102.5	40.97	5.139	8	8	7.972	7

## Sheet: Figure 4F
raw data
CTRL
3.44681	3.06818	2.70588	2.4	2.70454	2.8	2.8	3.1
AAV
5.04	3.67308	4.75862	5	5.2	4.8	4.7	5.1
ASO1
3.6875	3.92	2.98214	3.69091	3.7	3.5252	3.4399	3.2175
ASO2
3.8	3.8	3.9	3.6	3.5	3.7488	3.7087	3.2515
one-way ANOVA
Number of families	1
Number of comparisons per family	3
Alpha	0.05
Dunnett's multiple comparisons test	Mean Diff.	95.00% CI of diff.	Below threshold?	Summary	Adjusted P Value	B-?
AAV vs. ASO1	1.264	0.5766 to 1.950	Yes	**	0.002	A	ASO1
AAV vs. CTRL	1.906	1.258 to 2.553	Yes	***	<.001	C	CTRL
AAV vs. ASO2	1.12	0.4796 to 1.761	Yes	**	0.003	D	ASO2
Test details	Mean 1	Mean 2	Mean Diff.	SE of diff.	n1	n2	q	DF
AAV vs. ASO1	4.784	3.52	1.264	0.2312	8	8	5.465	7
AAV vs. CTRL	4.784	2.878	1.906	0.2179	8	8	8.746	7
AAV vs. ASO2	4.784	3.664	1.12	0.2157	8	8	5.195	7

## Sheet: Figure 4G
raw data
CTRL
33.9315	30.6964	29.2135	31	36	27	25	31
AAV
37.87	49.4551	59.9407	52	56	44	49	52
ASO1
34.8327	37.7576	33.7232	35	38	37.52	37.02	36.04
ASO2
36	31	33	35	35	35.32	37.02	34.26
one-way ANOVA
Number of families	1																															35.62
Number of comparisons per family	3
Alpha	0.05
Dunnett's multiple comparisons test	Mean Diff.	95.00% CI of diff.	Below threshold?	Summary	Adjusted P Value	B-?
AAV vs. ASO1	13.8	6.223 to 21.37	Yes	**	0.003	A	ASO1
AAV vs. CTRL	19.55	11.61 to 27.49	Yes	***	<.001	C	CTRL
AAV vs. ASO2	15.46	7.305 to 23.61	Yes	**	0.002	D	ASO2
Test details	Mean 1	Mean 2	Mean Diff.	SE of diff.	n1	n2	q	DF
AAV vs. ASO1	50.03	36.24	13.8	2.549	8	8	5.412	7
AAV vs. CTRL	50.03	30.48	19.55	2.673	8	8	7.316	7
AAV vs. ASO2	50.03	34.58	15.46	2.744	8	8	5.632	7

## Sheet: Figure 4H
raw data
CTRL
2.12894	1.52797	1.63253	1.55516	2.35932	1.54	1.57	1.6
AAV
2.24882	2.44848	2.31742	2.54	2.41	2.36	2.69	2.18
ASO1
1.89885	1.91287	1.87329	1.88	1.8	1.79	1.71	1.8
ASO2
1.8	1.93	1.87	1.85	1.85	1.89	1.81	1.8
one-way ANOVA
Number of families	1
Number of comparisons per family	3
Alpha	0.05
Dunnett's multiple comparisons test	Mean Diff.	95.00% CI of diff.	Below threshold?	Summary	Adjusted P Value	B-?
aav vs. ctrl	0.6601	0.2474 to 1.073	Yes	**	0.005	A	ctrl
aav vs. aso1	0.5662	0.3564 to 0.7760	Yes	***	<.001	C	aso1
aav vs. aso2	0.5493	0.3783 to 0.7204	Yes	***	<.001	D	aso2
Test details	Mean 1	Mean 2	Mean Diff.	SE of diff.	n1	n2	q	DF
aav vs. ctrl	2.399	1.739	0.6601	0.1389	8	8	4.752	7
aav vs. aso1	2.399	1.833	0.5662	0.07061	8	8	8.019	7
aav vs. aso2	2.399	1.85	0.5493	0.05758	8	8	9.541	7

## Sheet: Figure 4I
raw data
CTRL
81.7	73.6	71.4	104.5	86	55.1	78.3	110.1
AAV
148.5	112.6	115.1	143	136.2	143	143.1	128.4
ASO1
117	106.4	116	100.5	110.53	106.02	108.6	109.01
ASO2
103.7	127.4	96.7	124.8	124.5	106.52	109.65	111.78
one-way ANOVA
Number of families	1
Number of comparisons per family	3
Alpha	0.05
Dunnett's multiple comparisons test	Mean Diff.	95.00% CI of diff.	Below threshold?	Summary	Adjusted P Value	B-?
aav vs. ctrl	51.15	28.60 to 73.70	Yes	***	<.001	A	ctrl
aav vs. aso	24.48	8.421 to 40.54	Yes	**	0.007	C	aso
aav vs. aso2	20.61	1.313 to 39.90	Yes	*	0.038	D	aso2
Test details	Mean 1	Mean 2	Mean Diff.	SE of diff.	n1	n2	q	DF
aav vs. ctrl	133.7	82.59	51.15	7.589	8	8	6.74	7
aav vs. aso	133.7	109.3	24.48	5.405	8	8	4.529	7
aav vs. aso2	133.7	113.1	20.61	6.494	8	8	3.173	7

## Sheet: Figure 4J
raw data
CTRL
3.88819	3.98986	3.96	4.12	3.94225	3.96929	3.87	3.94
AAV
6.95785	6.60521	6.54109	6.64	6.85	6.13	6.59	6.8
ASO1
5.08	4.38299	4.2751	5.25	4.84	4.25	4.9	4.3
ASO2
3.95	5.55184	4.12	5.64961	4.75	4.78	4.29	5.1
one-way ANOVA
Number of families	1
Number of comparisons per family	3
Alpha	0.05
Dunnett's multiple comparisons test	Mean Diff.	95.00% CI of diff.	Below threshold?	Summary	Adjusted P Value	B-?
AAV vs. CTRL	2.679	2.386 to 2.973	Yes	***	<.001	A	CTRL
AAV vs. ASO1	1.98	1.610 to 2.349	Yes	***	<.001	C	ASO1
AAV vs. ASO2	1.865	1.115 to 2.616	Yes	***	<.001	D	ASO2
Test details	Mean 1	Mean 2	Mean Diff.	SE of diff.	n1	n2	q	DF
AAV vs. CTRL	6.639	3.96	2.679	0.09883	8	8	27.11	7
AAV vs. ASO1	6.639	4.66	1.98	0.1242	8	8	15.93	7
AAV vs. ASO2	6.639	4.774	1.865	0.2527	8	8	7.382	7
