# Supplementary material for: Amelioration of non-alcoholic fatty liver disease by targeting adhesion G protein-coupled receptor F1 (Adgrf1)
Source: eLife journal article supplement (doi:10.7554/elife.85131), 2023-08-02
Supplement: fig5-data1 [file Figure 5-Source 1.xlsx]

## Sheet: Figure 5A
raw data
Lipid metabolism	12	Scd1	Cyp4a12b	Acot1	Cyp4a14	Cyp4a31	Pltp	Abca1	Acaca	Pcsk9	Mrpl53	Hspd1	Ces2a
Amino acid metabolism	5	Dmgdh	Chac1	Gm3776	Bhmt	Ckm
Carbohydrate metabolism	5	G6pc	Pfkfb3	Pklr	Plcb1	Ugp2
Metabolism of cofactors and vitamins	5	Ugt1a5	Cd38	Cyp26a1	Cyp3a11	Ugt2b37
Nucleotide metabolism	3	Cmpk2	Prune1	Nt5e
Biosynthesis of other secondary metabolites	1	Lss
Energy metabolism	1	Pgam2

## Sheet: Figure 5B
raw data
	rAAV-GFP-NC-1	rAAV-GFP-NC-2	rAAV-GFP-NC-3	rAAV-Adgrf1-1	rAAV-Adgrf1-2	rAAV-Adgrf1-3	rAAV-Adgrf1-ASO-1	rAAV-Adgrf1-ASO-2	rAAV-Adgrf1-ASO-3
Adgrf1	0.06	0.45	0.36	1.96	1.71	1.89	1.11	1.12	1.11
Scd1	0.17	0.28	0.08	1.87	1.84	1.95	1.26	1.46	1.34
Srebf1	1.4	1.44	1.54	2.03	2.03	1.71	1.6	1.31	1.49
Cyp4a12b	0.36	0.85	0.71	1.81	1.84	1.97	1.45	1.48	1.63
Acot1	1.14	0.89	1.45	1.71	1.75	1.82	1.42	1.49	1.65
Cyp4a14	1.14	1	0.1	1.46	1.57	1.4	1.25	1.19	1.23
Cyp4a31	0.56	0.29	0.77	1.25	1.31	1.2	0.89	1.09	0.78
Fasn	1.32	1.38	1.31	1.47	1.76	1.46	1.4	1.34	1.17
Acaca	0.51	0.54	0.6	0.88	0.93	0.89	0.8	0.55	0.51
Pltp	0.31	0.45	0.28	0.99	0.81	0.73	0.64	0.48	0.59
Abca1	0.87	0.66	0.79	0.92	0.9	1.06	0.85	0.81	0.88
Pcsk9	0.21	0.34	0.52	-0.71	-0.91	-0.19	-0.05	-0.04	-0.04
Mlxipl	0.82	0.73	0.72	0.65	0.63	0.63	0.87	0.78	0.86
Mrpl53	-0.13	-0.18	-0.11	-0.26	-0.25	-0.29	-0.3	-0.37	-0.39
Hspd1	-0.82	-0.72	-0.18	-0.64	-0.73	-0.43	-0.44	-0.74	-0.83
Ces2a	-1.73	-1.45	-0.67	-1.64	-1.63	-1.63	-1.78	-1.77	-1.76

## Sheet: Figure 5C
raw data
	CTRL						AAV						ASO1						ASO2
Adgrf1	0.281915	2.7007	1.31343	1.39171	0.955219	0.890066	33.6686	44.735	43.2112	46.6347	40.5979	45.9927	9.88121	10.4564	9.76882	10.3421	10.5458	10.9661	10.455	8.90673	9.23341	10.5868	10.7268	10.2127
Scd1	0.156402	2.52859	2.52859	1.3919	0.479966	1.2316	21.1506	19.3018	18.1506	18.457	19.4788	20.473	4.42382	4.03607	4.63245	4.37937	4.73068	5.41307	3.00708	4.93215	5.97372	5.86612	4.46819	4.69728
Srebp1	0.883	0.799	1.005	0.928	1.0286	1.12	7.189	5.863	6.065	4.692	8.239	7.494	5.391	3.64	2.64	3.375	4.805	4.109	2.304	4.036	2.4	3.536	3.64	3.36
Cyp4a12b	0.6846	1.35035	1.08173	1.03728	0.81333	1.09637	4.3269	1.58374	9.80375	5.66994	11.3081	10.0576	1.67404	0.634342	1.76949	1.33516	0.69665	1.37068	1.26868	1.66522	1.70921	1.87177	1.38408	1.24832
Acot1	0.784584	0.913831	1.39474	0.80236	0.81037	1.07633	6.89861	5.89031	3.45815	3.27161	5.9794	8	3.24901	3.22657	2.88786	2.10679	2.86488	2.84418	2.39496	3.18215	2.53151	3.30689	2.51809	2.82519
Cyp4a14	0.670511	1.00928	1.47768	0.73378	1.13024	0.82279	2.93519	1.88474	2.45734	3.44727	5.86989	5.70938	3.79298	1.92297	1.56193	2.96961	1.61615	2.51902	1.7818	2.48796	3.68926	2.68585	2.14282	3.06624
Cy4a31	0.609909	1.05458	1.55473	0.9901	0.92065	1.11071	4.68825	2.45661	4.42804	4.45883	11.6049	10.4589	4.18918	3.74942	3.76239	4.15047	3.84231	3.89719	3.45017	4.60482	4.72258	4.02914	3.98291	4.06886
Fasn	1.126	0.892	1.091	1.24	1.185	0.811	1.81	1.421	1.128	1.101	1.272	1.2	1.208	1.101	0.819	1.086	0.961	1.145	0.775	1.171	1.061	0.757	1.175	1.028
Acaca	0.409897	3.63847	0.670511	0.85624	0.41997	1.20836	0.191224	0.091083	0.252439	0.46383	0.238754	0.391862	0.499492	1.05215	0.490843	1.4696	0.88241	1.04655	0.442372	1.65099	1.18372	0.7099	0.93384	1.11684
Pltp	0.880666	1.19471	0.950439	1.0336	0.55058	1.2197	3.90864	3.26406	4.18918	3.02444	5.45155	3.54717	2.21402	1.86176	3.64689	2.21553	3.69381	1.44759	2.09459	2.00355	2.17013	1.79672	1.95899	3.40381
Abca1	0.831238	1.08925	1.10445	0.71775	0.74353	1.29615	0.083814	0.08617	0.182167	0.195242	0.173539	0.167628	0.51883	0.289841	0.245421	0.12809	0.15175	0.12761	0.257623	0.371989	0.268563	0.08327	0.11646	0.13712
Pcsk9	1.04488	1.24257	0.770215	0.93792	1.0577	1.19245	0.409897	0.608502	0.36942	0.254905	0.247129	0.255843	1.3692	0.928731	1.3692	0.8819	1.24141	0.95419	1.08173	0.6846	1.4273	0.65874	1.24693	1.26585
Mlxipl	1.274	1.137	1.131	0.866	1.055	1.278	1.294	0.804	0.732	0.871	0.702	0.925	0.941	1.27	0.936	1.264	1.427	1.296	1.361	1.207	1.233	1.251	1.212	1.051
Mrpl53	0.757973	1.81924	1.20025	1.15122	1.283	0.85381	0.195242	0.200731	0.321599	0.291857	0.99539	1.04488	0.839317	0.601461	0.754364	1.0617	0.91275	0.50074	0.754364	0.797377	1.08925	0.7224	1.09887	0.68404
Hspd1	1.241	1.273	0.895	1.132	1.206	0.789	0.864	1.174	1.195	1.216	0.801	1.108	0.748	1.131	1.142	1.075	0.806	1.104	0.731	1.149	0.911	1.148	0.922	1.183
Ces2a	1.105	1.267	0.74	1.191	0.862	0.826	1.256	0.885	1.097	0.937	1.126	1.149	0.758	1.165	0.982	0.941	1.273	1.273	1.02	1.137	0.988	1.299	1.229	1.249
two-way ANOVA
Within each row, compare columns (simple effects within rows)
Number of families	16
Number of comparisons per family	3
Alpha	0.05
Dunnett's multiple comparisons test	Mean Diff.	95.00% CI of diff.	Below threshold?	Summary	Adjusted P Value
Adgrf1
aav vs. ctrl	41.22	39.75 to 42.69	Yes	***	<.001
aav vs. aso	32.15	30.68 to 33.61	Yes	***	<.001
aav vs. aso2	32.45	30.98 to 33.92	Yes	***	<.001
Scd1
aav vs. ctrl	18.12	16.65 to 19.58	Yes	***	<.001
aav vs. aso	14.9	13.43 to 16.37	Yes	***	<.001
aav vs. aso2	14.68	13.21 to 16.14	Yes	***	<.001
Srebp1
aav vs. ctrl	5.628	4.161 to 7.095	Yes	***	<.001
aav vs. aso	2.595	1.128 to 4.062	Yes	***	<.001
aav vs. aso2	3.377	1.910 to 4.844	Yes	***	<.001
Cyp4a12b
aav vs. ctrl	6.115	4.648 to 7.582	Yes	***	<.001
aav vs. aso	5.878	4.411 to 7.345	Yes	***	<.001
aav vs. aso2	5.6	4.133 to 7.067	Yes	***	<.001
Acot1
aav vs. ctrl	4.622	3.155 to 6.089	Yes	***	<.001
aav vs. aso	2.72	1.253 to 4.187	Yes	***	<.001
aav vs. aso2	2.79	1.323 to 4.257	Yes	***	<.001
Cyp4a14
aav vs. ctrl	2.745	1.278 to 4.212	Yes	***	<.001
aav vs. aso	1.322	-0.1452 to 2.789	No	ns	0.088
aav vs. aso2	1.075	-0.3918 to 2.542	No	ns	0.203
Cy4a31
aav vs. ctrl	5.312	3.845 to 6.779	Yes	***	<.001
aav vs. aso	2.418	0.9515 to 3.885	Yes	***	<.001
aav vs. aso2	2.208	0.7415 to 3.675	Yes	**	0.001
Fasn
aav vs. ctrl	0.2633	-1.204 to 1.730	No	ns	0.952
aav vs. aso	0.2667	-1.200 to 1.734	No	ns	0.95
aav vs. aso2	0.325	-1.142 to 1.792	No	ns	0.916
Acaca
aav vs. ctrl	-0.9317	-2.399 to 0.5352	No	ns	0.308
aav vs. aso	-0.6367	-2.104 to 0.8302	No	ns	0.608
aav vs. aso2	-0.735	-2.202 to 0.7318	No	ns	0.498
Pltp
aav vs. ctrl	2.927	1.460 to 4.394	Yes	***	<.001
aav vs. aso	1.383	-0.08351 to 2.850	No	ns	0.07
aav vs. aso2	1.66	0.1932 to 3.127	Yes	*	0.022
Abca1
aav vs. ctrl	-0.815	-2.282 to 0.6518	No	ns	0.415
aav vs. aso	-0.09667	-1.564 to 1.370	No	ns	0.997
aav vs. aso2	-0.05833	-1.525 to 1.409	No	ns	>.999
Pcsk9
aav vs. ctrl	-0.6817	-2.149 to 0.7852	No	ns	0.557
aav vs. aso	-0.765	-2.232 to 0.7018	No	ns	0.466
aav vs. aso2	-0.7033	-2.170 to 0.7635	No	ns	0.533
Mlxipl
aav vs. ctrl	-0.2383	-1.705 to 1.229	No	ns	0.964
aav vs. aso	-0.3033	-1.770 to 1.164	No	ns	0.93
aav vs. aso2	-0.3317	-1.799 to 1.135	No	ns	0.911
Mrpl53
aav vs. ctrl	-0.6683	-2.135 to 0.7985	No	ns	0.572
aav vs. aso	-0.2683	-1.735 to 1.199	No	ns	0.949
aav vs. aso2	-0.3483	-1.815 to 1.119	No	ns	0.899
Hspd1
aav vs. ctrl	-0.03	-1.497 to 1.437	No	ns	>.999
aav vs. aso	0.05833	-1.409 to 1.525	No	ns	>.999
aav vs. aso2	0.05333	-1.414 to 1.520	No	ns	>.999
Ces2a
aav vs. ctrl	0.07833	-1.389 to 1.545	No	ns	0.999
aav vs. aso	0.01333	-1.454 to 1.480	No	ns	>.999
aav vs. aso2	-0.07667	-1.544 to 1.390	No	ns	0.999
Test details	Mean 1	Mean 2	Mean Diff.	SE of diff.	N1	N2	q	DF
Adgrf1
aav vs. ctrl	42.47	1.255	41.22	0.6215	6	6	66.33	320
aav vs. aso	42.47	10.33	32.15	0.6215	6	6	51.73	320
aav vs. aso2	42.47	10.02	32.45	0.6215	6	6	52.22	320
Scd1
aav vs. ctrl	19.5	1.387	18.12	0.6215	6	6	29.15	320
aav vs. aso	19.5	4.602	14.9	0.6215	6	6	23.98	320
aav vs. aso2	19.5	4.825	14.68	0.6215	6	6	23.62	320
Srebp1
aav vs. ctrl	6.59	0.9617	5.628	0.6215	6	6	9.057	320
aav vs. aso	6.59	3.995	2.595	0.6215	6	6	4.176	320
aav vs. aso2	6.59	3.213	3.377	0.6215	6	6	5.433	320
Cyp4a12b
aav vs. ctrl	7.125	1.01	6.115	0.6215	6	6	9.84	320
aav vs. aso	7.125	1.247	5.878	0.6215	6	6	9.459	320
aav vs. aso2	7.125	1.525	5.6	0.6215	6	6	9.011	320
Acot1
aav vs. ctrl	5.583	0.9617	4.622	0.6215	6	6	7.437	320
aav vs. aso	5.583	2.863	2.72	0.6215	6	6	4.377	320
aav vs. aso2	5.583	2.793	2.79	0.6215	6	6	4.489	320
Cyp4a14
aav vs. ctrl	3.718	0.9733	2.745	0.6215	6	6	4.417	320
aav vs. aso	3.718	2.397	1.322	0.6215	6	6	2.127	320
aav vs. aso2	3.718	2.643	1.075	0.6215	6	6	1.73	320
Cy4a31
aav vs. ctrl	6.35	1.038	5.312	0.6215	6	6	8.547	320
aav vs. aso	6.35	3.932	2.418	0.6215	6	6	3.891	320
aav vs. aso2	6.35	4.142	2.208	0.6215	6	6	3.553	320
Fasn
aav vs. ctrl	1.322	1.058	0.2633	0.6215	6	6	0.4237	320
aav vs. aso	1.322	1.055	0.2667	0.6215	6	6	0.4291	320
aav vs. aso2	1.322	0.9967	0.325	0.6215	6	6	0.523	320
Acaca
aav vs. ctrl	0.27	1.202	-0.9317	0.6215	6	6	1.499	320
aav vs. aso	0.27	0.9067	-0.6367	0.6215	6	6	1.024	320
aav vs. aso2	0.27	1.005	-0.735	0.6215	6	6	1.183	320
Pltp
aav vs. ctrl	3.897	0.97	2.927	0.6215	6	6	4.709	320
aav vs. aso	3.897	2.513	1.383	0.6215	6	6	2.226	320
aav vs. aso2	3.897	2.237	1.66	0.6215	6	6	2.671	320
Abca1
aav vs. ctrl	0.1483	0.9633	-0.815	0.6215	6	6	1.311	320
aav vs. aso	0.1483	0.245	-0.09667	0.6215	6	6	0.1555	320
aav vs. aso2	0.1483	0.2067	-0.05833	0.6215	6	6	0.09387	320
Pcsk9
aav vs. ctrl	0.3583	1.04	-0.6817	0.6215	6	6	1.097	320
aav vs. aso	0.3583	1.123	-0.765	0.6215	6	6	1.231	320
aav vs. aso2	0.3583	1.062	-0.7033	0.6215	6	6	1.132	320
ChREBP
aav vs. ctrl	0.8867	1.125	-0.2383	0.6215	6	6	0.3835	320
aav vs. aso	0.8867	1.19	-0.3033	0.6215	6	6	0.4881	320
aav vs. aso2	0.8867	1.218	-0.3317	0.6215	6	6	0.5337	320
Mrpl53
aav vs. ctrl	0.5083	1.177	-0.6683	0.6215	6	6	1.075	320
aav vs. aso	0.5083	0.7767	-0.2683	0.6215	6	6	0.4318	320
aav vs. aso2	0.5083	0.8567	-0.3483	0.6215	6	6	0.5605	320
Hspd1
aav vs. ctrl	1.06	1.09	-0.03	0.6215	6	6	0.04827	320
aav vs. aso	1.06	1.002	0.05833	0.6215	6	6	0.09387	320
aav vs. aso2	1.06	1.007	0.05333	0.6215	6	6	0.08582	320
Ces2a
aav vs. ctrl	1.078	1	0.07833	0.6215	6	6	0.126	320
aav vs. aso	1.078	1.065	0.01333	0.6215	6	6	0.02146	320
aav vs. aso2	1.078	1.155	-0.07667	0.6215	6	6	0.1234	320
Ces2a
ctrl vs. aav	1	1.078	-0.07833	0.1288	6	6	0.8603	5
ctrl vs. aso	1	1.065	-0.065	0.1401	6	6	0.6561	5
ctrl vs. aso2	1	1.155	-0.155	0.09465	6	6	2.316	5
aav vs. aso	1.078	1.065	0.01333	0.1119	6	6	0.1685	5
aav vs. aso2	1.078	1.155	-0.07667	0.09065	6	6	1.196	5
aso vs. aso2	1.065	1.155	-0.09	0.07109	6	6	1.79	5

## Sheet: Figure 5D
raw data
rGFP+NC	rAAV-Adgrf1-NC	rAAV-Adgrf1-ASO1	rAAV-Adgrf1-ASO2
306	514	400	242
846	428	203	282
116	618	127	222
115	1841	87	157
127	1200	220	221
102	1861	452	119
118	424	207	139
208	1263	310	157
71	425	197	61
122	596	804	264
114	577	435	187
526	593	259	148
two-way ANOVA
Compare column means (main column effect)
Number of families	1
Number of comparisons per family	3
Alpha	0.05
Dunnett's multiple comparisons test	Mean Diff.	95.00% CI of diff.	Below threshold?	Summary	Adjusted P Value
rAAV-Adgrf1-NC vs. rGFP+NC	630.8	303.3 to 958.2	Yes	***	<.001
rAAV-Adgrf1-NC vs. rAAV-Adgrf1-ASO1	553.3	225.8 to 880.7	Yes	***	<.001
rAAV-Adgrf1-NC vs. rAAV-Adgrf1-ASO2	678.4	350.9 to 1006	Yes	***	<.001
Test details	Mean 1	Mean 2	Mean Diff.	SE of diff.	N1	N2	q	DF
rAAV-Adgrf1-NC vs. rGFP+NC	861.7	230.9	630.8	133	12	12	4.742	33
rAAV-Adgrf1-NC vs. rAAV-Adgrf1-ASO1	861.7	308.4	553.3	133	12	12	4.159	33
rAAV-Adgrf1-NC vs. rAAV-Adgrf1-ASO2	861.7	183.3	678.4	133	12	12	5.101	33
