# Supplementary material for: Amelioration of non-alcoholic fatty liver disease by targeting adhesion G protein-coupled receptor F1 (Adgrf1)
Source: eLife journal article supplement (doi:10.7554/elife.85131), 2023-08-02
Supplement: fig6-data1 [file Figure 6-Source 1.xlsx]

## Sheet: Figure 6A
raw data
	NC
Adgrf1	1.08674	0.920188	0.99888	1.03943	0.90559	0.95305
SCD1	1.1607	0.861546	0.81087	0.86785	1.21647	0.86111
	ADV
Adgrf1	5.73582	5.16941	6.01221	5.03838	6.53506	6.48785
SCD1	3.4822	3.81055	3.16751	3.34043	3.88724	3.09282
	ASO
Adgrf1	0.196146	0.0819	0.03368	0.0769	0.0523	0.07451
SCD1	0.539614	0.554785	0.60434	0.27327	0.39723	0.24331
	ASO2
Adgrf1	0.29357	0.124858	0.09666	0.14208	0.10493	0.12453
SCD1	0.678357	0.58327	0.39013	0.49144	0.27516	0.28003
two-way ANOVA
Within each row, compare columns (simple effects within rows)
Number of families	2
Number of comparisons per family	3
Alpha	0.05
Dunnett's multiple comparisons test	Mean Diff.	95.00% CI of diff.	Below threshold?	Summary	Adjusted P Value
Adgrf1
ADV vs. NC	4.846	3.948 to 5.743	Yes	***	<.001
ADV vs. ASO	5.744	4.866 to 6.622	Yes	***	<.001
ADV vs. ASO2	5.682	4.798 to 6.566	Yes	***	<.001
SCD1
ADV vs. NC	2.5	2.142 to 2.859	Yes	***	<.001
ADV vs. ASO	3.028	2.594 to 3.462	Yes	***	<.001
ADV vs. ASO2	3.014	2.559 to 3.468	Yes	***	<.001
Test details	Mean 1	Mean 2	Mean Diff.	SE of diff.	N1	N2	q	DF
Adgrf1
ADV vs. NC	5.83	0.984	4.846	0.2726	6	6	17.78	5
ADV vs. ASO	5.83	0.08591	5.744	0.2667	6	6	21.54	5
ADV vs. ASO2	5.83	0.1478	5.682	0.2683	6	6	21.18	5
SCD1
ADV vs. NC	3.463	0.9631	2.5	0.1089	6	6	22.96	5
ADV vs. ASO	3.463	0.4354	3.028	0.1319	6	6	22.95	5
ADV vs. ASO2	3.463	0.4497	3.014	0.138	6	6	21.84	5

## Sheet: Figure 6B
raw data
	CTRL
Adgrf1	1.16867	1.14217	0.689165
SCD1	1.09649	0.927499	0.976013
	ADV
Adgrf1	3.79519	3.15727	2.86078
SCD1	3.29936	3.73482	4.39424
	ASO
Adgrf1	0.10431	0.09525	0.12018
SCD1	1.14816	1.02184	1.03976
	ASO2
Adgrf1	0.15771	0.09116	0.09902
SCD1	1.14216	1.01665	0.986688
Figure 6B
Within each row, compare columns (simple effects within rows)
Number of families	2
Number of comparisons per family	3
Alpha	0.05
Dunnett's multiple comparisons test	Mean Diff.	95.00% CI of diff.	Below threshold?	Summary	Adjusted P Value
Adgrf1
ADV vs. -	2.271	1.159 to 3.383	Yes	*	0.012
ADV vs. ASO	3.165	1.472 to 4.857	Yes	*	0.015
ADV vs. ASO2	3.155	1.598 to 4.712	Yes	*	0.013
SCD1
ADV vs. -	2.809	0.6815 to 4.937	Yes	*	0.029
ADV vs. ASO	2.74	0.6312 to 4.848	Yes	*	0.03
ADV vs. ASO2	2.761	0.5679 to 4.954	Yes	*	0.032
Test details	Mean 1	Mean 2	Mean Diff.	SE of diff.	N1	N2	q	DF
Adgrf1
ADV vs. -	3.271	1	2.271	0.1834	3	3	12.38	2
ADV vs. ASO	3.271	0.1066	3.165	0.2791	3	3	11.34	2
ADV vs. ASO2	3.271	0.116	3.155	0.2567	3	3	12.29	2
SCD1
ADV vs. -	3.809	1	2.809	0.3508	3	3	8.008	2
ADV vs. ASO	3.809	1.07	2.74	0.3476	3	3	7.881	2
ADV vs. ASO2	3.809	1.049	2.761	0.3616	3	3	7.636	2

## Sheet: Figure 6C
raw data
GFP
1	0.96	1.09
GFP+DHEA
1.129	0.99	1.23
Adgrf1
5.11	4.15	4.37
Adgrf1+DHEA
7.012	6.78	7.17
one-way ANOVA
Number of families	1
Number of comparisons per family	6
Alpha	0.05
Tukey's multiple comparisons test	Mean Diff.	95.00% CI of diff.	Below threshold?	Summary	Adjusted P Value
Adgrf1 vs. GFP	3.527	1.498 to 5.556	Yes	*	0.017	A-B
Adgrf1 vs. Adgrf1+DHEA	-2.444	-4.352 to -0.5357	Yes	*	0.031	A-C
Adgrf1 vs. GFP+DHEA	3.427	1.507 to 5.347	Yes	*	0.016	A-D
GFP vs. Adgrf1+DHEA	-5.971	-6.510 to -5.431	Yes	***	<.001	B-C
GFP vs. GFP+DHEA	-0.09967	-0.3420 to 0.1427	No	ns	0.244	B-D
Adgrf1+DHEA vs. GFP+DHEA	5.871	5.568 to 6.174	Yes	***	<.001	C-D
Test details	Mean 1	Mean 2	Mean Diff.	SE of diff.	n1	n2	q	DF
Adgrf1 vs. GFP	4.543	1.017	3.527	0.2928	3	3	17.03	2
Adgrf1 vs. Adgrf1+DHEA	4.543	6.987	-2.444	0.2754	3	3	12.55	2
Adgrf1 vs. GFP+DHEA	4.543	1.116	3.427	0.2771	3	3	17.49	2
GFP vs. Adgrf1+DHEA	1.017	6.987	-5.971	0.07785	3	3	108.5	2
GFP vs. GFP+DHEA	1.017	1.116	-0.09967	0.03498	3	3	4.03	2
Adgrf1+DHEA vs. GFP+DHEA	6.987	1.116	5.871	0.04371	3	3	189.9	2

## Sheet: Figure 6D
raw data
	GFP CTRL
Adgrf1	0.842355	1.18715	0.92784
SCD1	0.94442	1.05885	1.26106
	GFP DHEA
Adgrf1	0.915416	1.18715	0.82628
SCD1	0.974342	0.785945	0.85368
	ADV CTRL
Adgrf1	5.60805	5.68634	6.25848
SCD1	2.76542	3.58631	4.27472
	ADV DHEA
Adgrf1	5.12481	5.74577	6.08179
SCD1	6.13686	5.36099	6.28383
two-way ANOVA
Within each row, compare columns (simple effects within rows)
Number of families	2
Number of comparisons per family	3
Alpha	0.05
Dunnett's multiple comparisons test	Mean Diff.	95.00% CI of diff.	Below threshold?	Summary	Adjusted P Value
Adgrf1
ADV CTRL vs. GFP CTRL	4.865	3.378 to 6.352	Yes	**	0.005
ADV CTRL vs. ADV DHEA	0.2002	-0.7526 to 1.153	No	ns	0.562
ADV CTRL vs. GFP DHEA	4.875	3.150 to 6.599	Yes	**	0.007
SCD1
ADV CTRL vs. GFP CTRL	2.454	0.3540 to 4.554	Yes	*	0.037
ADV CTRL vs. ADV DHEA	-2.385	-5.404 to 0.6342	No	ns	0.078
ADV CTRL vs. GFP DHEA	2.671	-0.2099 to 5.552	No	ns	0.058
Test details	Mean 1	Mean 2	Mean Diff.	SE of diff.	N1	N2	q	DF
Adgrf1
ADV CTRL vs. GFP CTRL	5.851	0.9858	4.865	0.2451	3	3	19.85	2
ADV CTRL vs. ADV DHEA	5.851	5.651	0.2002	0.1571	3	3	1.274	2
ADV CTRL vs. GFP DHEA	5.851	0.9763	4.875	0.2843	3	3	17.15	2
SCD1
ADV CTRL vs. GFP CTRL	3.542	1.088	2.454	0.3462	3	3	7.088	2
ADV CTRL vs. ADV DHEA	3.542	5.927	-2.385	0.4978	3	3	4.791	2
ADV CTRL vs. GFP DHEA	3.542	0.8713	2.671	0.475	3	3	5.623	2

## Sheet: Figure 6E
raw data
CTRL
1.8	1.97	1.83
Adgrf1
2.87	2.72	2.84
Adgrf1+sh1
2.16	2.06	2.18
Adgrf1+sh2
2.15	2.18	2.23
Adgrf1+ASO1
0.74	0.92	0.98
Adgrf1+ASO2
0.95	0.88	0.84
one-way ANOVA
Number of families	1
Number of comparisons per family	15
Alpha	0.05
Tukey's multiple comparisons test	Mean Diff.	95.00% CI of diff.	Below threshold?	Summary	Adjusted P Value
ADV+SH2 vs. ADV+SH	-0.05333	-0.3650 to 0.2583	No	ns	0.733	A-B
ADV+SH2 vs. ADV	-0.6767	-0.8149 to -0.5384	Yes	***	<.001	A-C
ADV+SH2 vs. CONTROL	0.2667	-0.4666 to 1.000	No	ns	0.304	A-D
ADV+SH2 vs. ASO	1.253	0.5471 to 1.960	Yes	*	0.016	A-E
ADV+SH2 vs. ASO2	1.243	0.8359 to 1.651	Yes	**	0.006	A-F
ADV+SH vs. ADV	-0.6233	-1.058 to -0.1887	Yes	*	0.025	B-C
ADV+SH vs. CONTROL	0.32	-0.1518 to 0.7918	No	ns	0.104	B-D
ADV+SH vs. ASO	1.307	0.8773 to 1.736	Yes	**	0.006	B-E
ADV+SH vs. ASO2	1.297	0.8414 to 1.752	Yes	**	0.007	B-F
ADV vs. CONTROL	0.9433	0.1285 to 1.758	Yes	*	0.038	C-D
ADV vs. ASO	1.93	1.088 to 2.772	Yes	*	0.011	C-E
ADV vs. ASO2	1.92	1.537 to 2.303	Yes	***	<.001	C-F
CONTROL vs. ASO	0.9867	0.4192 to 1.554	Yes	*	0.017	D-E
CONTROL vs. ASO2	0.9767	0.3992 to 1.554	Yes	*	0.018	D-F
ASO vs. ASO2	-0.01	-0.8736 to 0.8536	No	ns	>.999	E-F
Test details	Mean 1	Mean 2	Mean Diff.	SE of diff.	n1	n2	q	DF
ADV+SH2 vs. ADV+SH	2.133	2.187	-0.05333	0.03756	3	3	2.008	2
ADV+SH2 vs. ADV	2.133	2.81	-0.6767	0.01667	3	3	57.42	2
ADV+SH2 vs. CONTROL	2.133	1.867	0.2667	0.08838	3	3	4.267	2
ADV+SH2 vs. ASO	2.133	0.88	1.253	0.08511	3	3	20.82	2
ADV+SH2 vs. ASO2	2.133	0.89	1.243	0.0491	3	3	35.81	2
ADV+SH vs. ADV	2.187	2.81	-0.6233	0.05239	3	3	16.83	2
ADV+SH vs. CONTROL	2.187	1.867	0.32	0.05686	3	3	7.959	2
ADV+SH vs. ASO	2.187	0.88	1.307	0.05175	3	3	35.71	2
ADV+SH vs. ASO2	2.187	0.89	1.297	0.05487	3	3	33.42	2
ADV vs. CONTROL	2.81	1.867	0.9433	0.09821	3	3	13.58	2
ADV vs. ASO	2.81	0.88	1.93	0.1015	3	3	26.89	2
ADV vs. ASO2	2.81	0.89	1.92	0.04619	3	3	58.79	2
CONTROL vs. ASO	1.867	0.88	0.9867	0.06839	3	3	20.4	2
CONTROL vs. ASO2	1.867	0.89	0.9767	0.0696	3	3	19.84	2
ASO vs. ASO2	0.88	0.89	-0.01	0.1041	3	3	0.1359	2

## Sheet: Figure 6F
raw data
CTRL
1.63	1.8	1.74
Adgrf1
3.57	3.58	3.43
Adgrf1+sh1
1.74	1.97	1.99
Adgrf1+sh2
1.68	1.63	1.72
Adgrf1+ASO1
0.74	0.92	0.84
Adgrf1+ASO2
0.59	0.67	0.81
one-way ANOVA
Number of families	1
Number of comparisons per family	15
Alpha	0.05
Tukey's multiple comparisons test	Mean Diff.	95.00% CI of diff.	Below threshold?	Summary	Adjusted P Value
ADV+SH2 vs. ADV+SH	0.2233	-0.4747 to 0.9213	No	ns	0.368	A-B
ADV+SH2 vs. ADV	-1.627	-2.563 to -0.6900	Yes	*	0.017	A-C
ADV+SH2 vs. CONTROL	0.1767	-0.1598 to 0.5131	No	ns	0.165	A-D
ADV+SH2 vs. ASO	1.067	0.7008 to 1.433	Yes	**	0.007	A-E
ADV+SH2 vs. ASO2	1.21	0.8298 to 1.590	Yes	**	0.005	A-F
ADV+SH vs. ADV	-1.85	-2.448 to -1.252	Yes	**	0.006	B-C
ADV+SH vs. CONTROL	-0.04667	-0.5851 to 0.4917	No	ns	0.961	B-D
ADV+SH vs. ASO	0.8433	0.2718 to 1.415	Yes	*	0.023	B-E
ADV+SH vs. ASO2	0.9867	0.5416 to 1.432	Yes	*	0.011	B-F
ADV vs. CONTROL	1.803	1.197 to 2.410	Yes	**	0.006	C-D
ADV vs. ASO	2.693	2.102 to 3.285	Yes	***	<.001	C-E
ADV vs. ASO2	2.837	1.922 to 3.751	Yes	**	0.006	C-F
CONTROL vs. ASO	0.89	0.8421 to 0.9379	Yes	***	<.001	D-E
CONTROL vs. ASO2	1.033	0.5535 to 1.513	Yes	*	0.012	D-F
ASO vs. ASO2	0.1433	-0.3843 to 0.6710	No	ns	0.459	E-F
Test details	Mean 1	Mean 2	Mean Diff.	SE of diff.	n1	n2	q	DF
ADV+SH2 vs. ADV+SH	1.9	1.677	0.2233	0.08413	3	3	3.754	2
ADV+SH2 vs. ADV	1.9	3.527	-1.627	0.1129	3	3	20.38	2
ADV+SH2 vs. CONTROL	1.9	1.723	0.1767	0.04055	3	3	6.161	2
ADV+SH2 vs. ASO	1.9	0.8333	1.067	0.0441	3	3	34.21	2
ADV+SH2 vs. ASO2	1.9	0.69	1.21	0.04583	3	3	37.34	2
ADV+SH vs. ADV	1.677	3.527	-1.85	0.07211	3	3	36.28	2
ADV+SH vs. CONTROL	1.677	1.723	-0.04667	0.06489	3	3	1.017	2
ADV+SH vs. ASO	1.677	0.8333	0.8433	0.06888	3	3	17.31	2
ADV+SH vs. ASO2	1.677	0.69	0.9867	0.05364	3	3	26.01	2
ADV vs. CONTROL	3.527	1.723	1.803	0.07311	3	3	34.89	2
ADV vs. ASO	3.527	0.8333	2.693	0.07126	3	3	53.45	2
ADV vs. ASO2	3.527	0.69	2.837	0.1102	3	3	36.4	2
CONTROL vs. ASO	1.723	0.8333	0.89	0.005774	3	3	218	2
CONTROL vs. ASO2	1.723	0.69	1.033	0.05783	3	3	25.27	2
ASO vs. ASO2	0.8333	0.69	0.1433	0.0636	3	3	3.187	2

## Sheet: Figure 6G
raw data
CTRL
0.1	0.12	0.11
Adgrf1
0.21	0.23	0.24
Adgrf1+sh1
0.03	0.06	0.03
Adgrf1+sh2
0.04	0.06	0.04
Adgrf1+ASO1
0.01	0.01	0.01259
Adgrf1+ASO2
0.01	0.005	0.006948
one-way ANOVA
Number of families	1
Number of comparisons per family	15
Alpha	0.05
Tukey's multiple comparisons test	Mean Diff.	95.00% CI of diff.	Below threshold?	Summary	Adjusted P Value
Adgrf1+sh1 vs. Adgrf1+sh2	-0.006667	-0.03432 to 0.02099	No	ns	0.53	A-B
Adgrf1+sh1 vs. Adgrf1	-0.1867	-0.2864 to -0.08695	Yes	*	0.015	A-C
Adgrf1+sh1 vs. CTRL	-0.07	-0.1179 to -0.02210	Yes	*	0.024	A-D
Adgrf1+sh1 vs. Adgrf1+ASO1	0.02914	-0.05764 to 0.1159	No	ns	0.343	A-E
Adgrf1+sh1 vs. Adgrf1+ASO2	0.03268	-0.06018 to 0.1255	No	ns	0.319	A-F
Adgrf1+sh2 vs. Adgrf1	-0.18	-0.2630 to -0.09703	Yes	*	0.012	B-C
Adgrf1+sh2 vs. CTRL	-0.06333	-0.09099 to -0.03568	Yes	*	0.011	B-D
Adgrf1+sh2 vs. Adgrf1+ASO1	0.0358	-0.02342 to 0.09502	No	ns	0.129	B-E
Adgrf1+sh2 vs. Adgrf1+ASO2	0.03935	-0.02598 to 0.1047	No	ns	0.13	B-F
Adgrf1 vs. CTRL	0.1167	0.06135 to 0.1720	Yes	*	0.012	C-D
Adgrf1 vs. Adgrf1+ASO1	0.2158	0.1479 to 0.2837	Yes	**	0.005	C-E
Adgrf1 vs. Adgrf1+ASO2	0.2194	0.1368 to 0.3019	Yes	**	0.008	C-F
CTRL vs. Adgrf1+ASO1	0.09914	0.05070 to 0.1476	Yes	*	0.013	D-E
CTRL vs. Adgrf1+ASO2	0.1027	0.04279 to 0.1626	Yes	*	0.017	D-F
Adgrf1+ASO1 vs. Adgrf1+ASO2	0.003547	-0.01125 to 0.01834	No	ns	0.533	E-F
Test details	Mean 1	Mean 2	Mean Diff.	SE of diff.	n1	n2	q	DF
Adgrf1+sh1 vs. Adgrf1+sh2	0.04	0.04667	-0.006667	0.003333	3	3	2.828	2
Adgrf1+sh1 vs. Adgrf1	0.04	0.2267	-0.1867	0.01202	3	3	21.97	2
Adgrf1+sh1 vs. CTRL	0.04	0.11	-0.07	0.005774	3	3	17.15	2
Adgrf1+sh1 vs. Adgrf1+ASO1	0.04	0.01086	0.02914	0.01046	3	3	3.94	2
Adgrf1+sh1 vs. Adgrf1+ASO2	0.04	0.007316	0.03268	0.01119	3	3	4.13	2
Adgrf1+sh2 vs. Adgrf1	0.04667	0.2267	-0.18	0.01	3	3	25.46	2
Adgrf1+sh2 vs. CTRL	0.04667	0.11	-0.06333	0.003333	3	3	26.87	2
Adgrf1+sh2 vs. Adgrf1+ASO1	0.04667	0.01086	0.0358	0.007138	3	3	7.094	2
Adgrf1+sh2 vs. Adgrf1+ASO2	0.04667	0.007316	0.03935	0.007874	3	3	7.067	2
Adgrf1 vs. CTRL	0.2267	0.11	0.1167	0.006667	3	3	24.75	2
Adgrf1 vs. Adgrf1+ASO1	0.2267	0.01086	0.2158	0.008186	3	3	37.28	2
Adgrf1 vs. Adgrf1+ASO2	0.2267	0.007316	0.2194	0.009951	3	3	31.17	2
CTRL vs. Adgrf1+ASO1	0.11	0.01086	0.09914	0.005838	3	3	24.02	2
CTRL vs. Adgrf1+ASO2	0.11	0.007316	0.1027	0.007219	3	3	20.12	2
Adgrf1+ASO1 vs. Adgrf1+ASO2	0.01086	0.007316	0.003547	0.001783	3	3	2.813	2
