# Supplementary material for: Amelioration of non-alcoholic fatty liver disease by targeting adhesion G protein-coupled receptor F1 (Adgrf1)
Source: eLife journal article supplement (doi:10.7554/elife.85131), 2023-08-02
Supplement: fig7-data1 [file Figure 7-Source1.xlsx]

## Sheet: Figure 7B
raw data
CTRL
0.156402	2.52859	2.52859	1.3	1.1	0.6	0.4989	0.99637
AAV
61	52	57	43	58	60	63	57
MK
48	51	50	46	63	55	47	45
one-way ANOVA
Number of families	1
Number of comparisons per family	2
Alpha	0.05
Dunnett's multiple comparisons test	Mean Diff.	95.00% CI of diff.	Below threshold?	Summary	Adjusted P Value	B-?
AAV vs. CTRL	55.16	48.56 to 61.76	Yes	***	<.001	A	CTRL
AAV vs. MK	5.75	-1.728 to 13.23	No	ns	0.123	C	MK
Test details	Mean 1	Mean 2	Mean Diff.	SE of diff.	n1	n2	q	DF
AAV vs. CTRL	56.38	1.214	55.16	2.398	8	8	23.01	7
AAV vs. MK	56.38	50.63	5.75	2.717	8	8	2.116	7

## Sheet: Figure 7C
raw data
	CTRL			AAV			MK
Adgrf1	1.09065	1.21769	0.691662	2.73014	2.90276	2.52454	2.51438	1.87935	2.81735
SCD1	1.0239	1.09127	0.983176	3.21296	3.01297	3.47533	3.31246	3.02945	3.27373
two-way ANOVA
Within each row, compare columns (simple effects within rows)
Number of families	2
Number of comparisons per family	2
Alpha	0.05
Dunnett's multiple comparisons test	Mean Diff.	95.00% CI of diff.	Below threshold?	Summary	Adjusted P Value
Adgrf1
AAV vs. CTRL	1.719	1.403 to 2.035	Yes	**	0.002
AAV vs. MK	0.3155	-1.761 to 2.392	No	ns	0.68
SCD1
AAV vs. CTRL	2.201	1.308 to 3.094	Yes	**	0.009
AAV vs. MK	0.02854	-0.4579 to 0.5150	No	ns	0.932
Test details	Mean 1	Mean 2	Mean Diff.	SE of diff.	N1	N2	q	DF
Adgrf1
AAV vs. CTRL	2.719	1	1.719	0.05837	3	3	29.45	2
AAV vs. MK	2.719	2.404	0.3155	0.3832	3	3	0.8232	2
SCD1
AAV vs. CTRL	3.234	1.033	2.201	0.1648	3	3	13.36	2
AAV vs. MK	3.234	3.205	0.02854	0.08979	3	3	0.3179	2

## Sheet: Figure 7D
raw data
	ctrl								aav								mk
1	44	42	43	44	43	44	45	43	42	43	43	46	45	44	44	44	42	45	44	44	43	43	44	44
2	45	43	43	45	43	44	45	43	43	44	44	46	45	43	44	45	43	45	45	45	44	44	44	45
3	44	44	44	46	44	45	44	44	45	46	45	47	46	45	45	45	44	46	46	46	45	45	45	45
4	45	45	45	47	45	44	45	43	46	47	47	48	46	45	46	46	45	47	47	48	46	47	46	46
5	45	45	46	48	46	44	45	45	47	48	48	49	47	47	48	47	45	47	47	47	48	49	48	46
6	46	45	47	48	46	47	45	44	48	49	49	49	49	48	48	49	46	47	47	46	46	48	49	47
7	47	47	47	48	47	47	45	45	50	49	51	50	50	51	52	50	47	47	48	47	47	48	49	48
8	48	47	46	49	48	47	45	45	51	50	52	50	50	51	52	50	48	49	49	48	48	49	49	49
9	47	48	47	49	49	48	46	46	51	51	53	52	51	52	52	52	48	50	50	49	49	51	50	50
10	48	50	48	48	50	49	47	48	52	52	54	52	52	53	52	52	49	51	51	50	50	51	50	51
11	49	49	49	48	51	50	48	49	53	53	55	52	52	53	53	52	49	52	51	49	49	52	51	51
12	50	51	50	49	52	50	49	50	53	54	56	53	54	52	53	52	49	52	52	51	50	51	51	51
two-way ANOVA
Within each row, compare columns (simple effects within rows)
Number of families	12
Number of comparisons per family	2
Alpha	0.05
Dunnett's multiple comparisons test	Mean Diff.	95.00% CI of diff.	Below threshold?	Summary	Adjusted P Value
1
aav vs. ctrl	0.375	-0.9948 to 1.745	No	ns	0.685
aav vs. mk	0.25	-1.101 to 1.601	No	ns	0.834
2
aav vs. ctrl	0.375	-1.090 to 1.840	No	ns	0.716
aav vs. mk	-0.125	-0.9370 to 0.6870	No	ns	0.88
3
aav vs. ctrl	1.125	0.5015 to 1.749	Yes	**	0.003
aav vs. mk	0.25	-0.4380 to 0.9380	No	ns	0.534
4
aav vs. ctrl	1.125	0.1608 to 2.089	Yes	*	0.026
aav vs. mk	-0.125	-0.9370 to 0.6870	No	ns	0.88
5
aav vs. ctrl	2.125	1.313 to 2.937	Yes	***	<.001
aav vs. mk	0.5	-0.8760 to 1.876	No	ns	0.534
6
aav vs. ctrl	2.625	1.255 to 3.995	Yes	**	0.002
aav vs. mk	1.625	0.2552 to 2.995	Yes	*	0.025
7
aav vs. ctrl	3.75	2.126 to 5.374	Yes	***	<.001
aav vs. mk	2.75	2.300 to 3.200	Yes	***	<.001
8
aav vs. ctrl	3.875	1.899 to 5.851	Yes	**	0.002
aav vs. mk	2.125	1.313 to 2.937	Yes	***	<.001
9
aav vs. ctrl	4.25	2.712 to 5.788	Yes	***	<.001
aav vs. mk	2.125	1.313 to 2.937	Yes	***	<.001
10
aav vs. ctrl	3.875	2.555 to 5.195	Yes	***	<.001
aav vs. mk	2	1.265 to 2.735	Yes	***	<.001
11
aav vs. ctrl	3.75	2.302 to 5.198	Yes	***	<.001
aav vs. mk	2.375	1.108 to 3.642	Yes	**	0.002
12
aav vs. ctrl	3.25	1.899 to 4.601	Yes	***	<.001
aav vs. mk	2.5	1.226 to 3.774	Yes	**	0.002
Test details	Mean 1	Mean 2	Mean Diff.	SE of diff.	N1	N2	q	DF
1
aav vs. ctrl	43.88	43.5	0.375	0.4978	8	8	0.7534	7
aav vs. mk	43.88	43.63	0.25	0.491	8	8	0.5092	7
2
aav vs. ctrl	44.25	43.88	0.375	0.5324	8	8	0.7043	7
aav vs. mk	44.25	44.38	-0.125	0.295	8	8	0.4237	7
3
aav vs. ctrl	45.5	44.38	1.125	0.2266	8	8	4.965	7
aav vs. mk	45.5	45.25	0.25	0.25	8	8	1	7
4
aav vs. ctrl	46.38	45.25	1.125	0.3504	8	8	3.211	7
aav vs. mk	46.38	46.5	-0.125	0.295	8	8	0.4237	7
5
aav vs. ctrl	47.63	45.5	2.125	0.295	8	8	7.202	7
aav vs. mk	47.63	47.13	0.5	0.5	8	8	1	7
6
aav vs. ctrl	48.63	46	2.625	0.4978	8	8	5.274	7
aav vs. mk	48.63	47	1.625	0.4978	8	8	3.265	7
7
aav vs. ctrl	50.38	46.63	3.75	0.5901	8	8	6.355	7
aav vs. mk	50.38	47.63	2.75	0.1637	8	8	16.8	7
8
aav vs. ctrl	50.75	46.88	3.875	0.7181	8	8	5.396	7
aav vs. mk	50.75	48.63	2.125	0.295	8	8	7.202	7
9
aav vs. ctrl	51.75	47.5	4.25	0.559	8	8	7.603	7
aav vs. mk	51.75	49.63	2.125	0.295	8	8	7.202	7
10
aav vs. ctrl	52.38	48.5	3.875	0.4795	8	8	8.082	7
aav vs. mk	52.38	50.38	2	0.2673	8	8	7.483	7
11
aav vs. ctrl	52.88	49.13	3.75	0.5261	8	8	7.128	7
aav vs. mk	52.88	50.5	2.375	0.4605	8	8	5.158	7
12
aav vs. ctrl	53.38	50.13	3.25	0.491	8	8	6.619	7
aav vs. mk	53.38	50.88	2.5	0.4629	8	8	5.401	7

## Sheet: Figure 7E
raw data
	ctrl								AAV								MK
1	136	129	112	127	135	129	137	138	132	120	118	125	136	113	116	128	125	132	137	120	114	128	114	132
2	138	123	129	123	125	120	138	128	142	125	133	136	136	124	120	126	132	125	143	136	126	139	128	129
3	147	152	136	131	139	131	147	143	153	139	147	141	149	143	149	142	144	142	140	138	150	146	149	144
4	156	143	142	149	150	142	147	146	162	150	163	166	163	157	155	163	159	137	155	146	158	166	170	162
5	168	159	156	164	166	166	158	169	174	161	188	183	186	176	184	188	166	157	167	164	190	176	181	166
6	185	155	166	158	159	164	187	178	186	188	173	182	176	183	187	180	170	152	153	158	179	170	179	177
7	172	142	159	169	155	160	161	169	178	188	183	174	179	187	186	186	173	166	162	163	163	176	161	178
8	172	160	153	168	162	173	162	168	185	179	177	171	184	178	170	172	169	162	166	174	166	164	161	161
9	168	163	157	161	173	162	172	164	181	184	188	176	185	173	185	190	156	152	163	179	150	172	156	165
10	161	166	143	168	173	175	172	175	190	188	183	165	185	191	185	181	165	161	168	171	165	174	157	180
11	152	163	156	163	174	166	164	161	197	197	182	183	192	174	197	194	178	179	166	182	172	160	170	174
12	158	167	178	181	184	175	180	178	194	207	191	200	180	177	196	197	182	193	166	185	162	152	157	154
two-way ANOVA
Within each row, compare columns (simple effects within rows)
Number of families	12
Number of comparisons per family	2
Alpha	0.05
Dunnett's multiple comparisons test	Mean Diff.	95.00% CI of diff.	Below threshold?	Summary	Adjusted P Value
1
AAV vs. ctrl	-6.875	-15.55 to 1.803	No	ns	0.113
AAV vs. MK	-1.75	-14.92 to 11.42	No	ns	0.909
2
AAV vs. ctrl	2.25	-6.977 to 11.48	No	ns	0.737
AAV vs. MK	-2	-10.75 to 6.749	No	ns	0.763
3
AAV vs. ctrl	4.625	-3.630 to 12.88	No	ns	0.274
AAV vs. MK	1.25	-3.246 to 5.746	No	ns	0.678
4
AAV vs. ctrl	13	7.671 to 18.33	Yes	***	<.001
AAV vs. MK	3.25	-7.718 to 14.22	No	ns	0.646
5
AAV vs. ctrl	16.75	6.900 to 26.60	Yes	**	0.004
AAV vs. MK	9.125	-0.7760 to 19.03	No	ns	0.068
6
AAV vs. ctrl	12.88	0.9992 to 24.75	Yes	*	0.036
AAV vs. MK	14.63	2.608 to 26.64	Yes	*	0.022
7
AAV vs. ctrl	21.75	9.077 to 34.42	Yes	**	0.004
AAV vs. MK	14.88	7.831 to 21.92	Yes	**	0.001
8
AAV vs. ctrl	12.25	3.998 to 20.50	Yes	**	0.008
AAV vs. MK	11.63	5.089 to 18.16	Yes	**	0.003
9
AAV vs. ctrl	17.75	10.53 to 24.97	Yes	***	<.001
AAV vs. MK	21.13	7.341 to 34.91	Yes	**	0.007
10
AAV vs. ctrl	16.88	3.817 to 29.93	Yes	*	0.017
AAV vs. MK	15.88	3.830 to 27.92	Yes	*	0.015
11
AAV vs. ctrl	27.13	15.87 to 38.38	Yes	***	<.001
AAV vs. MK	16.88	9.623 to 24.13	Yes	***	<.001
12
AAV vs. ctrl	17.63	3.017 to 32.23	Yes	*	0.023
AAV vs. MK	23.88	12.55 to 35.20	Yes	**	0.001
Test details	Mean 1	Mean 2	Mean Diff.	SE of diff.	N1	N2	q	DF
1
AAV vs. ctrl	123.5	130.4	-6.875	3.153	8	8	2.18	7
AAV vs. MK	123.5	125.3	-1.75	4.787	8	8	0.3655	7
2
AAV vs. ctrl	130.3	128	2.25	3.353	8	8	0.6711	7
AAV vs. MK	130.3	132.3	-2	3.179	8	8	0.6291	7
3
AAV vs. ctrl	145.4	140.8	4.625	3	8	8	1.542	7
AAV vs. MK	145.4	144.1	1.25	1.634	8	8	0.765	7
4
AAV vs. ctrl	159.9	146.9	13	1.936	8	8	6.713	7
AAV vs. MK	159.9	156.6	3.25	3.985	8	8	0.8155	7
5
AAV vs. ctrl	180	163.3	16.75	3.579	8	8	4.679	7
AAV vs. MK	180	170.9	9.125	3.598	8	8	2.536	7
6
AAV vs. ctrl	181.9	169	12.88	4.315	8	8	2.983	7
AAV vs. MK	181.9	167.3	14.63	4.367	8	8	3.349	7
7
AAV vs. ctrl	182.6	160.9	21.75	4.605	8	8	4.723	7
AAV vs. MK	182.6	167.8	14.88	2.56	8	8	5.812	7
8
AAV vs. ctrl	177	164.8	12.25	2.999	8	8	4.085	7
AAV vs. MK	177	165.4	11.63	2.375	8	8	4.895	7
9
AAV vs. ctrl	182.8	165	17.75	2.624	8	8	6.765	7
AAV vs. MK	182.8	161.6	21.13	5.009	8	8	4.218	7
10
AAV vs. ctrl	183.5	166.6	16.88	4.745	8	8	3.556	7
AAV vs. MK	183.5	167.6	15.88	4.377	8	8	3.627	7
11
AAV vs. ctrl	189.5	162.4	27.13	4.09	8	8	6.632	7
AAV vs. MK	189.5	172.6	16.88	2.635	8	8	6.404	7
12
AAV vs. ctrl	192.8	175.1	17.63	5.308	8	8	3.32	7
AAV vs. MK	192.8	168.9	23.88	4.116	8	8	5.8	7

## Sheet: Figure 7F
raw data
ctrl
1.36508	1.05754	0.878968	0.829365	1.28571	1.13584	0.862141	1.19658
aav
1.7123	1.78175	1.50397	1.67416	1.56614	1.78614	1.59273	1.68383
mk
1.29564	1.40476	1.39484	1.79167	1.79364	1.79777	1.51217	1.6237
one-way ANOVA
Number of families	1
Number of comparisons per family	2
Alpha	0.05
Dunnett's multiple comparisons test	Mean Diff.	95.00% CI of diff.	Below threshold?	Summary	Adjusted P Value	B-?
aav vs. ctrl	0.5862	0.3942 to 0.7783	Yes	***	<.001	A	ctrl
aav vs. mk	0.08585	-0.1300 to 0.3017	No	ns	0.48	C	mk
Test details	Mean 1	Mean 2	Mean Diff.	SE of diff.	n1	n2	q	DF
aav vs. ctrl	1.663	1.076	0.5862	0.06979	8	8	8.4	7
aav vs. mk	1.663	1.577	0.08585	0.07843	8	8	1.095	7

## Sheet: Figure 7G
raw data
CTRL
12.4687	9.11966	6.78188	7.34021	12.2544	12.2684	6.83571	10.7019
AAV
19.1375	21.9353	17.2357	19.3619	21.2423	18.4189	19.0208	19.3922
mk
18.5226	15.3029	17.9335	15.2188	16.2117	11.1994	10.5879	12.8375
one-way ANOVA
Number of families	1
Number of comparisons per family	2
Alpha	0.05
Dunnett's multiple comparisons test	Mean Diff.	95.00% CI of diff.	Below threshold?	Summary	Adjusted P Value	B-?
AAV vs. CTRL	9.747	7.276 to 12.22	Yes	***	<.001	A	CTRL
AAV vs. mk	4.741	1.585 to 7.898	Yes	**	0.008	C	mk
Test details	Mean 1	Mean 2	Mean Diff.	SE of diff.	n1	n2	q	DF
AAV vs. CTRL	19.47	9.721	9.747	0.8978	8	8	10.86	7
AAV vs. mk	19.47	14.73	4.741	1.147	8	8	4.133	7

## Sheet: Figure 7H
raw data-curve
	CTRL								MK								AAV
0	151	151	143	151	168	175	162	180	165	161	168	171	197	175	158	152	190	188	183	203	191	186	197	187
15	401	328	398	350	402	339	387	366	401	305	317	300	353	324	337	335	468	447	438	454	468	483	460	454
30	294	271	313	294	347	278	285	320	318	271	267	264	281	252	307	270	402	360	375	437	397	387	424	397
60	218	170	228	218	247	217	231	230	274	255	258	247	253	238	274	256	369	265	295	327	286	359	356	291
90	194	168	240	191	233	219	206	230	216	210	203	192	219	203	224	215	308	194	227	222	230	223	277	280
120	191	120	207	175	178	198	153	181	190	163	177	178	200	188	153	164	249	178	180	214	218	192	188	194
two-way ANOVA-curve
Within each row, compare columns (simple effects within rows)
Number of families	6
Number of comparisons per family	2
Alpha	0.05
Dunnett's multiple comparisons test	Mean Diff.	95.00% CI of diff.	Below threshold?	Summary	Adjusted P Value
Row 1
AAV vs. CTRL	30.5	17.16 to 43.84	Yes	***	<.001
AAV vs. MK	22.25	8.493 to 36.01	Yes	**	0.004
Row 2
AAV vs. CTRL	87.63	57.77 to 117.5	Yes	***	<.001
AAV vs. MK	125	92.90 to 157.1	Yes	***	<.001
Row 3
AAV vs. CTRL	97.13	66.49 to 127.8	Yes	***	<.001
AAV vs. MK	118.6	89.49 to 147.8	Yes	***	<.001
Row 4
AAV vs. CTRL	98.63	58.04 to 139.2	Yes	***	<.001
AAV vs. MK	61.63	22.89 to 100.4	Yes	**	0.005
Row 5
AAV vs. CTRL	35	-5.548 to 75.55	No	ns	0.091
AAV vs. MK	34.88	-2.809 to 72.56	No	ns	0.068
Row 6
AAV vs. CTRL	26.25	-5.637 to 58.14	No	ns	0.11
AAV vs. MK	25	-0.4044 to 50.40	No	ns	0.054
Test details	Mean 1	Mean 2	Mean Diff.	SE of diff.	N1	N2	q	DF
Row 1
AAV vs. CTRL	190.6	160.1	30.5	5.208	8	8	5.857	10.18
AAV vs. MK	190.6	168.4	22.25	5.355	8	8	4.155	9.986
Row 2
AAV vs. CTRL	459	371.4	87.63	11.62	8	8	7.543	9.964
AAV vs. MK	459	334	125	12.41	8	8	10.08	9.563
Row 3
AAV vs. CTRL	397.4	300.3	97.13	12.47	8	8	7.79	14
AAV vs. MK	397.4	278.8	118.6	11.85	8	8	10.01	13.87
Row 4
AAV vs. CTRL	318.5	219.9	98.63	16.05	8	8	6.145	11.11
AAV vs. MK	318.5	256.9	61.63	14.61	8	8	4.217	8.35
Row 5
AAV vs. CTRL	245.1	210.1	35	16.2	8	8	2.161	11.96
AAV vs. MK	245.1	210.3	34.88	14.1	8	8	2.473	8.019
Row 6
AAV vs. CTRL	201.6	175.4	26.25	12.95	8	8	2.027	13.72
AAV vs. MK	201.6	176.6	25	10.17	8	8	2.459	12.14
raw data-AUC
CTRL	MK	AAV
1278	1354	1767
1073	1157	1449
1354	1137	1517
1216	1147	1649
1402	1282	1586
1240	1199	1641
1267	1240	1710
1327	1214	1613
ANOVA-AUC
Number of families	1
Number of comparisons per family	2
Alpha	0.05
Dunnett's T3 multiple comparisons test	Mean Diff.	95.00% CI of diff.	Below threshold?	Summary	Adjusted P Value	C-?
AAV vs. CTRL	346.9	203.1 to 490.7	Yes	***	<.001	A	CTRL
AAV vs. MK	400.3	272.1 to 528.4	Yes	***	<.001	B	MK
Test details	Mean 1	Mean 2	Mean Diff.	SE of diff.	n1	n2	t	DF
AAV vs. CTRL	1617	1270	346.9	50.42	8	8	6.879	14
AAV vs. MK	1617	1216	400.3	44.46	8	8	9.002	12.84

## Sheet: Figure 7I
raw data-curve
	MK								110 AAV								CTRL
0	182	193	166	185	175	174	182	190	207	191	200	205	202	197	207	206	158	167	178	181	169	183	151	171
15	209	201	206	209	212	217	216	210	254	269	251	275	279	266	262	250	158	185	191	173	190	178	174	181
30	233	232	227	238	233	231	247	238	294	298	283	286	299	303	298	307	198	239	223	213	227	229	227	237
45	215	226	203	216	213	211	208	212	261	271	272	278	270	271	272	285	162	172	224	213	201	201	209	216
60	189	221	185	203	203	202	203	209	234	253	247	253	230	257	249	254	150	157	182	176	190	180	183	164
90	173	181	172	171	183	177	173	185	206	219	200	216	214	226	215	217	146	145	177	152	165	172	164	189
120	164	180	170	165	174	188	188	181	175	188	180	207	201	195	192	196	146	140	143	124	130	146	138	146
two-way ANOVA-curve
Within each row, compare columns (simple effects within rows)
Number of families	7
Number of comparisons per family	2
Alpha	0.05
Dunnett's multiple comparisons test	Mean Diff.	95.00% CI of diff.	Below threshold?	Summary	Adjusted P Value
Row 1
110 AAV vs. MK	21	11.66 to 30.34	Yes	***	<.001
110 AAV vs. CTRL	32.13	20.84 to 43.41	Yes	***	<.001
Row 2
110 AAV vs. MK	53.25	42.25 to 64.25	Yes	***	<.001
110 AAV vs. CTRL	84.5	71.17 to 97.83	Yes	***	<.001
Row 3
110 AAV vs. MK	61.13	52.25 to 70.00	Yes	***	<.001
110 AAV vs. CTRL	71.88	58.04 to 85.71	Yes	***	<.001
Row 4
110 AAV vs. MK	59.5	51.18 to 67.82	Yes	***	<.001
110 AAV vs. CTRL	72.75	51.39 to 94.11	Yes	***	<.001
Row 5
110 AAV vs. MK	45.25	32.29 to 58.21	Yes	***	<.001
110 AAV vs. CTRL	74.38	59.22 to 89.53	Yes	***	<.001
Row 6
110 AAV vs. MK	37.25	28.75 to 45.75	Yes	***	<.001
110 AAV vs. CTRL	50.38	34.64 to 66.11	Yes	***	<.001
Row 7
110 AAV vs. MK	15.5	3.143 to 27.86	Yes	*	0.015
110 AAV vs. CTRL	52.63	40.94 to 64.31	Yes	***	<.001
Test details	Mean 1	Mean 2	Mean Diff.	SE of diff.	N1	N2	q	DF
Row 1
110 AAV vs. MK	201.9	180.9	21	3.727	8	8	5.635	11.89
110 AAV vs. CTRL	201.9	169.8	32.13	4.421	8	8	7.267	10.39
Row 2
110 AAV vs. MK	263.3	210	53.25	4.283	8	8	12.43	9.985
110 AAV vs. CTRL	263.3	178.8	84.5	5.423	8	8	15.58	13.99
Row 3
110 AAV vs. MK	296	234.9	61.13	3.583	8	8	17.06	12.98
110 AAV vs. CTRL	296	224.1	71.88	5.501	8	8	13.06	11.58
Row 4
110 AAV vs. MK	272.5	213	59.5	3.386	8	8	17.57	13.99
110 AAV vs. CTRL	272.5	199.8	72.75	8.064	8	8	9.022	8.381
Row 5
110 AAV vs. MK	247.1	201.9	45.25	5.267	8	8	8.591	13.8
110 AAV vs. CTRL	247.1	172.8	74.38	6.089	8	8	12.21	12.53
Row 6
110 AAV vs. MK	214.1	176.9	37.25	3.412	8	8	10.92	12.4
110 AAV vs. CTRL	214.1	163.8	50.38	6.168	8	8	8.167	10.44
Row 7
110 AAV vs. MK	191.8	176.3	15.5	5.023	8	8	3.086	13.85
110 AAV vs. CTRL	191.8	139.1	52.63	4.725	8	8	11.14	13.2
raw data-AUC
MK	110 AAV	CTRL
1192	1440	966
1248	1500	1052
1161	1443	1158
1212	1514	1080
1219	1494	1123
1219	1519	1125
1232	1496	1102
1240	1514	1146
ANOVA-AUC
Number of families	1
Number of comparisons per family	2
Alpha	0.05
Dunnett's T3 multiple comparisons test	Mean Diff.	95.00% CI of diff.	Below threshold?	Summary	Adjusted P Value	C-?
CTRL vs. MK	-121.4	-194.1 to -48.64	Yes	**	0.001	A	MK
CTRL vs. 110 AAV	-396	-470.2 to -321.8	Yes	***	<.001	B	110 AAV
Test details	Mean 1	Mean 2	Mean Diff.	SE of diff.	n1	n2	t	DF
CTRL vs. MK	1094	1215	-121.4	24.09	8	8	5.038	9.732
CTRL vs. 110 AAV	1094	1490	-396	24.59	8	8	16.1	10.34

## Sheet: Figure 7J
raw data-curve
	MK								110 AAV								CTRL
0	178	179	166	182	182	178	167	174	197	182	183	182	185	180	196	196	152	163	156	163	162	156	170	152
15	152	128	124	151	166	153	150	153	193	183	186	186	185	183	184	197	82	164	159	164	160	152	156	155
30	103	99	69	72	124	100	118	106	81	84	83	81	94	94	99	100	61	156	82	104	94	98	118	109
45	76	72	54	76	75	73	70	78	75	93	77	96	88	82	88	98	55	101	65	91	88	106	94	119
60	88	96	51	70	100	68	67	61	79	75	60	70	60	62	64	80	50	116	65	94	76	96	67	61
90	93	106	55	59	114	70	66	64	84	70	48	62	60	65	62	66	62	94	70	73	94	68	66	97
120	133	125	61	79	126	87	84	97	115	85	76	86	89	119	109	109	96	85	84	93	100	97	86	92
two-way ANOVA-curve
Within each row, compare columns (simple effects within rows)
Number of families	7
Number of comparisons per family	2
Alpha	0.05
Dunnett's multiple comparisons test	Mean Diff.	95.00% CI of diff.	Below threshold?	Summary	Adjusted P Value
Row 1
110 AAV vs. MK	11.88	3.471 to 20.28	Yes	**	0.007
110 AAV vs. CTRL	28.38	19.95 to 36.80	Yes	***	<.001
Row 2
110 AAV vs. MK	40	26.18 to 53.82	Yes	***	<.001
110 AAV vs. CTRL	38.13	11.42 to 64.83	Yes	**	0.01
Row 3
110 AAV vs. MK	-9.375	-28.83 to 10.08	No	ns	0.386
110 AAV vs. CTRL	-13.25	-40.42 to 13.92	No	ns	0.369
Row 4
110 AAV vs. MK	15.38	5.432 to 25.32	Yes	**	0.004
110 AAV vs. CTRL	-2.75	-23.61 to 18.11	No	ns	0.919
Row 5
110 AAV vs. MK	-6.375	-23.99 to 11.24	No	ns	0.568
110 AAV vs. CTRL	-9.375	-31.15 to 12.40	No	ns	0.454
Row 6
110 AAV vs. MK	-13.75	-36.41 to 8.914	No	ns	0.249
110 AAV vs. CTRL	-13.38	-28.90 to 2.152	No	ns	0.092
Row 7
110 AAV vs. MK	-0.5	-27.81 to 26.81	No	ns	0.998
110 AAV vs. CTRL	6.875	-9.176 to 22.93	No	ns	0.457
Test details	Mean 1	Mean 2	Mean Diff.	SE of diff.	N1	N2	q	DF
Row 1
110 AAV vs. MK	187.6	175.8	11.88	3.411	8	8	3.482	13.65
110 AAV vs. CTRL	187.6	159.3	28.38	3.421	8	8	8.294	13.68
Row 2
110 AAV vs. MK	187.1	147.1	40	5.271	8	8	7.589	8.832
110 AAV vs. CTRL	187.1	149	38.13	9.853	8	8	3.869	7.487
Row 3
110 AAV vs. MK	89.5	98.88	-9.375	7.487	8	8	1.252	9.324
110 AAV vs. CTRL	89.5	102.8	-13.25	10.21	8	8	1.298	8.183
Row 4
110 AAV vs. MK	87.13	71.75	15.38	4.041	8	8	3.805	13.82
110 AAV vs. CTRL	87.13	89.88	-2.75	8.015	8	8	0.3431	9.245
Row 5
110 AAV vs. MK	68.75	75.13	-6.375	6.864	8	8	0.9288	10.06
110 AAV vs. CTRL	68.75	78.13	-9.375	8.328	8	8	1.126	8.995
Row 6
110 AAV vs. MK	64.63	78.38	-13.75	8.779	8	8	1.566	9.686
110 AAV vs. CTRL	64.63	78	-13.38	6.239	8	8	2.144	12.54
Row 7
110 AAV vs. MK	98.5	99	-0.5	10.88	8	8	0.04597	11.71
110 AAV vs. CTRL	98.5	91.63	6.875	6.126	8	8	1.122	8.888
raw data-AUC
CTRL	110 AAV	MK
667.5	668	434
653	638.5	755
466.5	583.5	561
558.5	629	654
733	624	643
596.5	635.5	646.5
596.5	649.5	629
597.5	693.5	663
ANOVA-AUC
Number of families	1
Number of comparisons per family	2
Alpha	0.05
Dunnett's T3 multiple comparisons test	Mean Diff.	95.00% CI of diff.	Below threshold?	Summary	Adjusted P Value	B-?
110 AAV vs. CTRL	31.56	-61.97 to 125.1	No	ns	0.531	A	CTRL
110 AAV vs. MK	17	-90.52 to 124.5	No	ns	0.862	C	MK
Test details	Mean 1	Mean 2	Mean Diff.	SE of diff.	n1	n2	t	DF
110 AAV vs. CTRL	640.2	608.6	31.56	30.29	8	8	1.042	9.267
110 AAV vs. MK	640.2	623.2	17	34.81	8	8	0.4883	8.67
