# Supplementary material for: Amelioration of non-alcoholic fatty liver disease by targeting adhesion G protein-coupled receptor F1 (Adgrf1)
Source: eLife journal article supplement (doi:10.7554/elife.85131), 2023-08-02
Supplement: fig8-data1 [file Figure 8-Source 1.xlsx]

## Sheet: Figure 8A
raw data
CTRL	AAV	MK
182.08	222.92	212
194.56	230	196
188.75	215.42	195.46
165.42	227	202
113	212	216
163	231	219
145	224	203
125	217	195
one-way ANOVA
Number of families	1
Number of comparisons per family	2
Alpha	0.05
Dunnett's multiple comparisons test	Mean Diff.	95.00% CI of diff.	Below threshold?	Summary	Adjusted P Value	B-?
AAV vs. CTRL	62.82	36.84 to 88.79	Yes	***	<.001	A	CTRL
AAV vs. MK	17.61	6.561 to 28.66	Yes	**	0.006	C	MK
Test details	Mean 1	Mean 2	Mean Diff.	SE of diff.	n1	n2	q	DF
AAV vs. CTRL	222.4	159.6	62.82	9.44	8	8	6.654	7
AAV vs. MK	222.4	204.8	17.61	4.015	8	8	4.386	7

## Sheet: Figure 8B
raw data
CTRL	AAV	MK
78.68	135.57	121.69
80.06	131.4	92.55
88.39	130.02	108.96
67.58	134	107.82
55.09	129	97
60	130	91
82	122	89
79	125	81
one-way ANOVA
Number of families	1
Number of comparisons per family	2
Alpha	0.05
Dunnett's multiple comparisons test	Mean Diff.	95.00% CI of diff.	Below threshold?	Summary	Adjusted P Value	B-?
AAV vs. TG	55.77	42.98 to 68.57	Yes	***	<.001	A	TG
AAV vs. MK	31	21.16 to 40.83	Yes	***	<.001	C	MK
Test details	Mean 1	Mean 2	Mean Diff.	SE of diff.	n1	n2	q	DF
AAV vs. TG	129.6	73.85	55.77	4.648	8	8	12	7
AAV vs. MK	129.6	98.63	31	3.573	8	8	8.676	7

## Sheet: Figure 8C
raw data
CTRL	AAV	MK
454.332	448.746	423.323
447.07	439.36	426.959
442.042	424.387	420.256
425.284	448.237	442.042
448.746	450.855	447.07
449.307	431.461	435.296
462.832	424.6	437.955
437.803	421.433	434.473
one-way ANOVA
Number of families	1
Number of comparisons per family	2
Alpha	0.05
Dunnett's multiple comparisons test	Mean Diff.	95.00% CI of diff.	Below threshold?	Summary	Adjusted P Value	B-?
aav vs. ctrl	-9.792	-27.10 to 7.514	No	ns	0.268	A	ctrl
aav vs. mk	2.713	-9.888 to 15.31	No	ns	0.785	C	mk
Test details	Mean 1	Mean 2	Mean Diff.	SE of diff.	n1	n2	q	DF
aav vs. ctrl	436.1	445.9	-9.792	6.289	8	8	1.557	7
aav vs. mk	436.1	433.4	2.713	4.579	8	8	0.5925	7

## Sheet: Figue 8D
raw data
HDL	CTRL	AAV	MK	LDL	CTRL	AAV	MK
	70.161	46.03	65.9381		18.9288	29.2387	28.5536
	65.3348	49.6496	67.7479		19.7412	31.9271	31.9271
	67.7479	47.2365	68.3512		17.304	27.6139	29.4899
	74.3839	46.8535	67.7479		5.11809	29.7584	25.428
	60.5086	46.8906	65.4801		13.242	33.651	33.7131
	62.5134	46.388	68.8368		12.1271	35.4274	29.9224
	68.9367	47.146	65.7264		13.2979	33.0238	27.7198
	71.2985	46.5372	65.8424		12.5164	33.4818	28.0082
two-way ANOVA
Within each row, compare columns (simple effects within rows)
Number of families	2
Number of comparisons per family	2
Alpha	0.05
Dunnett's multiple comparisons test	Mean Diff.	95.00% CI of diff.	Below threshold?	Summary	Adjusted P Value
HDL
AAV vs. CTRL	-20.52	-25.34 to -15.69	Yes	***	<.001
AAV vs. HDL	-19.87	-21.34 to -18.40	Yes	***	<.001
LDL
AAV vs. CTRL	17.73	12.02 to 23.44	Yes	***	<.001
AAV vs. HDL	2.42	-0.5287 to 5.369	No	ns	0.101
Test details	Mean 1	Mean 2	Mean Diff.	SE of diff.	N1	N2	q	DF
HDL
AAV vs. CTRL	47.09	67.61	-20.52	1.753	8	8	11.7	7
AAV vs. HDL	47.09	66.96	-19.87	0.5347	8	8	37.16	7
LDL
AAV vs. CTRL	31.77	14.03	17.73	2.076	8	8	8.542	7
AAV vs. HDL	31.77	29.35	2.42	1.071	8	8	2.259	7

## Sheet: Figure 8E
raw data
AST	CTRL	AAV	MK	ALT	CTRL	AAV	MK
	133.569	213.885	158.013		91.665	151.029	125.236
	115.236	186.822	130.95		102.141	138.807	110.871
	110.871	193.806	139.68		78.57	158.886	127.776
	108.252	204.683	145.791		113.077	142.453	119.522
	145.791	193.134	149.2		114.363	130.218	129.836
	121.858	206.79	136.909		89.476	143.857	114.968
	147.056	189.709	156.416		90.581	141.65	115.292
	114.499	199.47	133.536		95.59	158.366	112.639
two-way ANOVA
Within each row, compare columns (simple effects within rows)
Number of families	2
Number of comparisons per family	2
Alpha	0.05
Dunnett's multiple comparisons test	Mean Diff.	95.00% CI of diff.	Below threshold?	Summary	Adjusted P Value
AST
AST vs. CTRL	73.9	55.28 to 92.51	Yes	***	<.001
AST vs. MK	54.73	43.38 to 66.07	Yes	***	<.001
ALT
AST vs. CTRL	48.73	28.76 to 68.69	Yes	***	<.001
AST vs. MK	26.14	13.98 to 38.30	Yes	**	0.001
Test details	Mean 1	Mean 2	Mean Diff.	SE of diff.	N1	N2	q	DF
AST
AST vs. CTRL	198.5	124.6	73.9	6.764	8	8	10.93	7
AST vs. MK	198.5	143.8	54.73	4.122	8	8	13.28	7
ALT
AST vs. CTRL	145.7	96.93	48.73	7.253	8	8	6.718	7
AST vs. MK	145.7	119.5	26.14	4.418	8	8	5.917	7

## Sheet: Figure 8F
raw data
CTRL	AAV	MK
3.13	4.72	3.86
3.12	5.02	3.64
2.8	4.78	4.17
3.07	4.9	3.76
2.53	4.8	4.16
3.1	4.73	3.98
2.99	4.91	3.66
2.81	4.77	3.81
one-way ANOVA
Number of families	1
Number of comparisons per family	2
Alpha	0.05
Dunnett's multiple comparisons test	Mean Diff.	95.00% CI of diff.	Below threshold?	Summary	Adjusted P Value	B-?
AAV vs. CTRL	1.885	1.677 to 2.093	Yes	***	<.001	A	CTRL
AAV vs. MK	0.9488	0.6709 to 1.227	Yes	***	<.001	C	MK
Test details	Mean 1	Mean 2	Mean Diff.	SE of diff.	n1	n2	q	DF
AAV vs. CTRL	4.829	2.944	1.885	0.07552	8	8	24.96	7
AAV vs. MK	4.829	3.88	0.9488	0.101	8	8	9.397	7

## Sheet: Figure 8G
raw data
CTRL	AAV	MK
33.92	59.224	46.787
37.713	57.613	51.496
35.752	56.72	47.033
34.264	59.19	50.407
36.24	50.369	43.089
32.679	51.854	42.435
32.744	50.962	48.415
35.002	53.604	45.81
one-way ANOVA
Number of families	1
Number of comparisons per family	2
Alpha	0.05
Šídák's multiple comparisons test	Mean Diff.	95.00% CI of diff.	Below threshold?	Summary	Adjusted P Value	B-?
AAV vs. CTRL	20.15	16.49 to 23.81	Yes	***	<.001	A	CTRL
AAV vs. MK	8.008	5.101 to 10.92	Yes	***	<.001	C	MK
Test details	Mean 1	Mean 2	Mean Diff.	SE of diff.	n1	n2	t	DF
AAV vs. CTRL	54.94	34.79	20.15	1.292	8	8	15.6	7
AAV vs. MK	54.94	46.93	8.008	1.026	8	8	7.802	7

## Sheet: Figure 8H
raw data
CTRL	AAV	MK
0.82	2.59	2.41
1.41	3.35	1.59
1.59	2.59	2.24
0.24	3.1	2.18
1.2	2.6	2.59
0.88	2.78	2.68
0.93	2.87	1.77
1.01	3.12	1.89
one-way ANOVA
Number of families	1
Number of comparisons per family	2
Alpha	0.05
Dunnett's multiple comparisons test	Mean Diff.	95.00% CI of diff.	Below threshold?	Summary	Adjusted P Value	B-?
AAV vs. CTRL	1.865	1.340 to 2.390	Yes	***	<.001	A	CTRL
AAV vs. MK	0.7063	0.08634 to 1.326	Yes	*	0.029	C	MK
Test details	Mean 1	Mean 2	Mean Diff.	SE of diff.	n1	n2	q	DF
AAV vs. CTRL	2.875	1.01	1.865	0.1907	8	8	9.781	7
AAV vs. MK	2.875	2.169	0.7063	0.2253	8	8	3.135	7

## Sheet: Figure 8I
raw data
CTRL	AAV	MK
65.04	136.38	103.38
57.63	139.16	90.98
88.2	103.95	92.45
61.33	117.85	105
61	78.94	92
61	126	115
79.34	122.74	85.3
62.23	109.33	97.32
one-way ANOVA
Number of families	1
Number of comparisons per family	2
Alpha	0.05
Dunnett's multiple comparisons test	Mean Diff.	95.00% CI of diff.	Below threshold?	Summary	Adjusted P Value	B-?
aav vs. ctrl	49.82	26.65 to 72.99	Yes	**	0.001	A	ctrl
aav vs. mk	19.12	0.2838 to 37.95	Yes	*	0.047	C	mk
Test details	Mean 1	Mean 2	Mean Diff.	SE of diff.	n1	n2	q	DF
aav vs. ctrl	116.8	66.97	49.82	8.419	8	8	5.918	7
aav vs. mk	116.8	97.68	19.12	6.843	8	8	2.793	7

## Sheet: Figure 8J
raw data
CTRL	AAV	MK
4.06724	7.64389	6.31
2.97066	8.11208	5.62
2.68011	7.00914	6.37
2.59465	7.11	5.38
2.91	7.59	5.12
3.91	8.01	5.62
3.53	7.88	6.61
3.61	7.34	5.98
one-way ANOVA
Number of families	1
Number of comparisons per family	2
Alpha	0.05
Dunnett's multiple comparisons test	Mean Diff.	95.00% CI of diff.	Below threshold?	Summary	Adjusted P Value	B-?
aav vs. ctrl	4.303	3.811 to 4.795	Yes	***	<.001	A	ctrl
aav vs. mk	1.711	1.047 to 2.374	Yes	***	<.001	C	mk
Test details	Mean 1	Mean 2	Mean Diff.	SE of diff.	n1	n2	q	DF
aav vs. ctrl	7.587	3.284	4.303	0.1788	8	8	24.07	7
aav vs. mk	7.587	5.876	1.711	0.2411	8	8	7.094	7
