# Supplementary material for: Amelioration of non-alcoholic fatty liver disease by targeting adhesion G protein-coupled receptor F1 (Adgrf1)
Source: eLife journal article supplement (doi:10.7554/elife.85131), 2023-08-02
Supplement: fig9-data1 [file Figure 9-Source 1.xlsx]

## Sheet: Figure 9A
raw data
Healthy lean	Healthy obese	NAFLD patient
2.8	2.7	2.9
2.67	2.6	2.8
2.8	2.83	2.7
2.861	2.56	3.1
2.81759	2.8	2.8
2.75	2.6	2.8
2.57905	2.3	2.9
2.93	2.2	2.7
2.88586	2.9	2.6
2.88	2.5	2.6
2.83528	2.6	2.4
3.2	2.6	2.4
	2	2.6
	2.6	2.8
	3.1	2.8
	2.6	2.7
	2.4	2.8
		2.6
		2.9
		2.6
		2.9
		2.79
		2.73
multiple comparison
Number of families	1
Number of comparisons per family	3
Alpha	0.05
Tukey's multiple comparisons test	Mean Diff.	95.00% CI of diff.	Below threshold?	Summary	Adjusted P Value
Healthy lean vs. Healthy obese	0.2994	0.1020 to 0.4967	Yes	**	0.005	A-B
Healthy lean vs. NAFLD patient	0.09841	-0.1167 to 0.3136	No	ns	0.458	A-C
Healthy obese vs. NAFLD patient	-0.2009	-0.3732 to -0.02865	Yes	*	0.021	B-C
Test details	Mean 1	Mean 2	Mean Diff.	SE of diff.	n1	n2	q	DF
Healthy lean vs. Healthy obese	2.834	2.535	0.2994	0.07306	12	17	5.795	11
Healthy lean vs. NAFLD patient	2.834	2.736	0.09841	0.07966	12	23	1.747	11
Healthy obese vs. NAFLD patient	2.535	2.736	-0.2009	0.06677	17	23	4.256	16

## Sheet: Figure 9B
raw data
Adgrf1	Scd1
2.2	5.15843
2.3	5.6045
2.4	5.70031
2.5	5.9621
2.56	6.00887
2.6	6.1411
2.6	6.22736
2.6	6.2979
2.6	6.32802
2.6	6.35143
2.6	6.38008
2.7	6.38232
2.8	6.47423
2.83	6.76505
2.9	7.04901
3.1	7.55102
2.9	5.17048
2.5	5.56422
2.7	5.70443
2.7	5.71242
2.8	6.21175
2.8	6.37554
2.9	6.54787
3.1	6.76981
2.8	7.05056
2.67	7.53876
2.5	6.07
2.861	6.04813
2.81759	8.23582
2.46	6.11267
2.57905	5.06397
2.93	6.00088
2.88586	5.3106
2.88	5.17098
2.83528	5.9727
3.2	7.46285
Linear regression
	scd1
Best-fit values
Slope	1.544
Y-intercept	2.045
X-intercept	-1.325
1/slope	0.6477
Std. Error
Slope	0.5062
Y-intercept	1.378
95% Confidence Intervals
Slope	0.5152 to 2.573
Y-intercept	-0.7559 to 4.846
X-intercept	-9.393 to 0.2942
Goodness of Fit
R squared	0.2148
Sy.x	0.6581
Is slope significantly non-zero?
F	9.303
DFn, DFd	1, 34
P value	0.0044
Deviation from zero?	Significant
Equation	Y = 1.544*X + 2.045
Data
Number of X values	36
Maximum number of Y replicates	1
Total number of values	36
Number of missing values	0

## Sheet: Figure 9C
raw data
Mild
10.231	11.319	10.298
Moderate
22.123	21.143	17.607
Severe
38.791	39.523	37.875
one-way ANOVA
Number of families	1
Number of comparisons per family	3
Alpha	0.05
Tukey's multiple comparisons test	Mean Diff.	95.00% CI of diff.	Below threshold?	Summary	Adjusted P Value
Mild vs. Moderate	-9.675	-17.48 to -1.869	Yes	*	0.033	A-B
Mild vs. Severe	-28.11	-29.81 to -26.42	Yes	***	<.001	A-C
Moderate vs. Severe	-18.44	-24.56 to -12.31	Yes	**	0.006	B-C
Test details	Mean 1	Mean 2	Mean Diff.	SE of diff.	n1	n2	q	DF
Mild vs. Moderate	10.62	20.29	-9.675	1.325	3	3	10.33	2
Mild vs. Severe	10.62	38.73	-28.11	0.2873	3	3	138.4	2
Moderate vs. Severe	20.29	38.73	-18.44	1.04	3	3	25.08	2

## Sheet: Figure 9D
raw data
Healthy lean	Healthy obese	NAFLD patient
5.35479	4.50689	5.71
5.27194	4.97146	5.24
3.43508	4.47995	4.26
4.60922	3.32123	6.93
4.13435	4.79938	4.99
3.47133	5.39983	4.13
7.24051	3.87042	4.89
4.86779	4.6091	4.07
3.22664	5.79553	4.95
	3.92805	4.14
	3.55103	5.37
	3.51637	4.17
		4.79
		4.1
		5.37
		4.22
one-way ANOVA
Number of families	1
Number of comparisons per family	2
Alpha	0.05
Dunnett's multiple comparisons test	Mean Diff.	95.00% CI of diff.	Below threshold?	Summary	Adjusted P Value	B-?
healthy obese vs. Lean	-0.2277	-1.162 to 0.7065	No	ns	0.798	A	Lean
healthy obese vs. NAFLD	-0.4374	-1.246 to 0.3718	No	ns	0.363	C	NAFLD
Test details	Mean 1	Mean 2	Mean Diff.	SE of diff.	n1	n2	q	DF
healthy obese vs. Lean	4.396	4.624	-0.2277	0.4048	12	9	0.5627	34
healthy obese vs. NAFLD	4.396	4.833	-0.4374	0.3505	12	16	1.248	34

## Sheet: Figure 9E
raw data
Lean	HFD	HFD+CCL4	HFD+STZ
0.76	9.27	23.16	26.13
0.99	12.68	18.55	25.59
0.93	11.98	20.97	33.77
1.06	13.27	25.26	17.12
two-way ANOVA
Compare column means (main column effect)
Number of families	1
Number of comparisons per family	3
Alpha	0.05
Dunnett's multiple comparisons test	Mean Diff.	95.00% CI of diff.	Below threshold?	Summary	Adjusted P Value
HFD vs. Lean	7.358	0.05156 to 14.66	Yes	*	0.0485
HFD vs. HFD+CCL4	-9.193	-16.50 to -1.887	Yes	*	0.0161
HFD vs. HFD+STZ	-17.36	-24.67 to -10.05	Yes	***	0.0003
Test details	Mean 1	Mean 2	Mean Diff.	SE of diff.	N1	N2	q	DF
HFD vs. Lean	8.293	0.935	7.358	2.598	4	4	2.832	9
HFD vs. HFD+CCL4	8.293	17.49	-9.193	2.598	4	4	3.538	9
HFD vs. HFD+STZ	8.293	25.65	-17.36	2.598	4	4	6.681	9

## Sheet: Figure 9F
raw data
Lean	HFD	HFD+CCL4	HFD+STZ
0.99	11.54	19.72	32.87
1.07	12.77	24.53	22.84
1	13.92	17.65	37.5
0.95	10.98	23.91	22.53
two-way ANOVA
Compare column means (main column effect)
Number of families	1
Number of comparisons per family	3
Alpha	0.05
Dunnett's multiple comparisons test	Mean Diff.	95.00% CI of diff.	Below threshold?	Summary	Adjusted P Value
HFD vs. Lean	11.3	2.265 to 20.33	Yes	*	0.017
HFD vs. HFD+CCL4	-9.15	-18.18 to -0.1150	Yes	*	0.047
HFD vs. HFD+STZ	-16.63	-25.67 to -7.598	Yes	**	0.002
Test details	Mean 1	Mean 2	Mean Diff.	SE of diff.	N1	N2	q	DF
HFD vs. Lean	12.3	1.003	11.3	3.213	4	4	3.517	9
HFD vs. HFD+CCL4	12.3	21.45	-9.15	3.213	4	4	2.848	9
HFD vs. HFD+STZ	12.3	28.94	-16.63	3.213	4	4	5.176	9

## Sheet: Figure 9G
raw data
Lean	HFD	HFD+CCL4	HFD+STZ
1.23	0.05	0.44	0.58
0.77	0.08	0.46	0.51
0.84	0.07	0.4	0.43
1.26	0.09	0.44	0.4
two-way ANOVA
Compare column means (main column effect)
Number of families	1
Number of comparisons per family	3
Alpha	0.05
Dunnett's multiple comparisons test	Mean Diff.	95.00% CI of diff.	Below threshold?	Summary	Adjusted P Value
HFD vs. Lean	-0.9525	-1.220 to -0.6852	Yes	***	<.001
HFD vs. HFD+CCL4	-0.3625	-0.6298 to -0.09518	Yes	*	0.011
HFD vs. HFD+STZ	-0.4075	-0.6748 to -0.1402	Yes	**	0.005
Test details	Mean 1	Mean 2	Mean Diff.	SE of diff.	N1	N2	q	DF
HFD vs. Lean	0.0725	1.025	-0.9525	0.09507	4	4	10.02	9
HFD vs. HFD+CCL4	0.0725	0.435	-0.3625	0.09507	4	4	3.813	9
HFD vs. HFD+STZ	0.0725	0.48	-0.4075	0.09507	4	4	4.286	9
