# Supplementary material for: Amelioration of non-alcoholic fatty liver disease by targeting adhesion G protein-coupled receptor F1 (Adgrf1)
Source: eLife journal article supplement (doi:10.7554/elife.85131), 2023-08-02
Supplement: figures [file elife-85131-figures-v2.pdf]

---

## Figures and figure supplements

Amelioration of non-alcoholic fatty liver disease by targeting adhesion G protein-coupled receptor F1 (*Adgrf1*)

**Mengyao Wu *et al.***

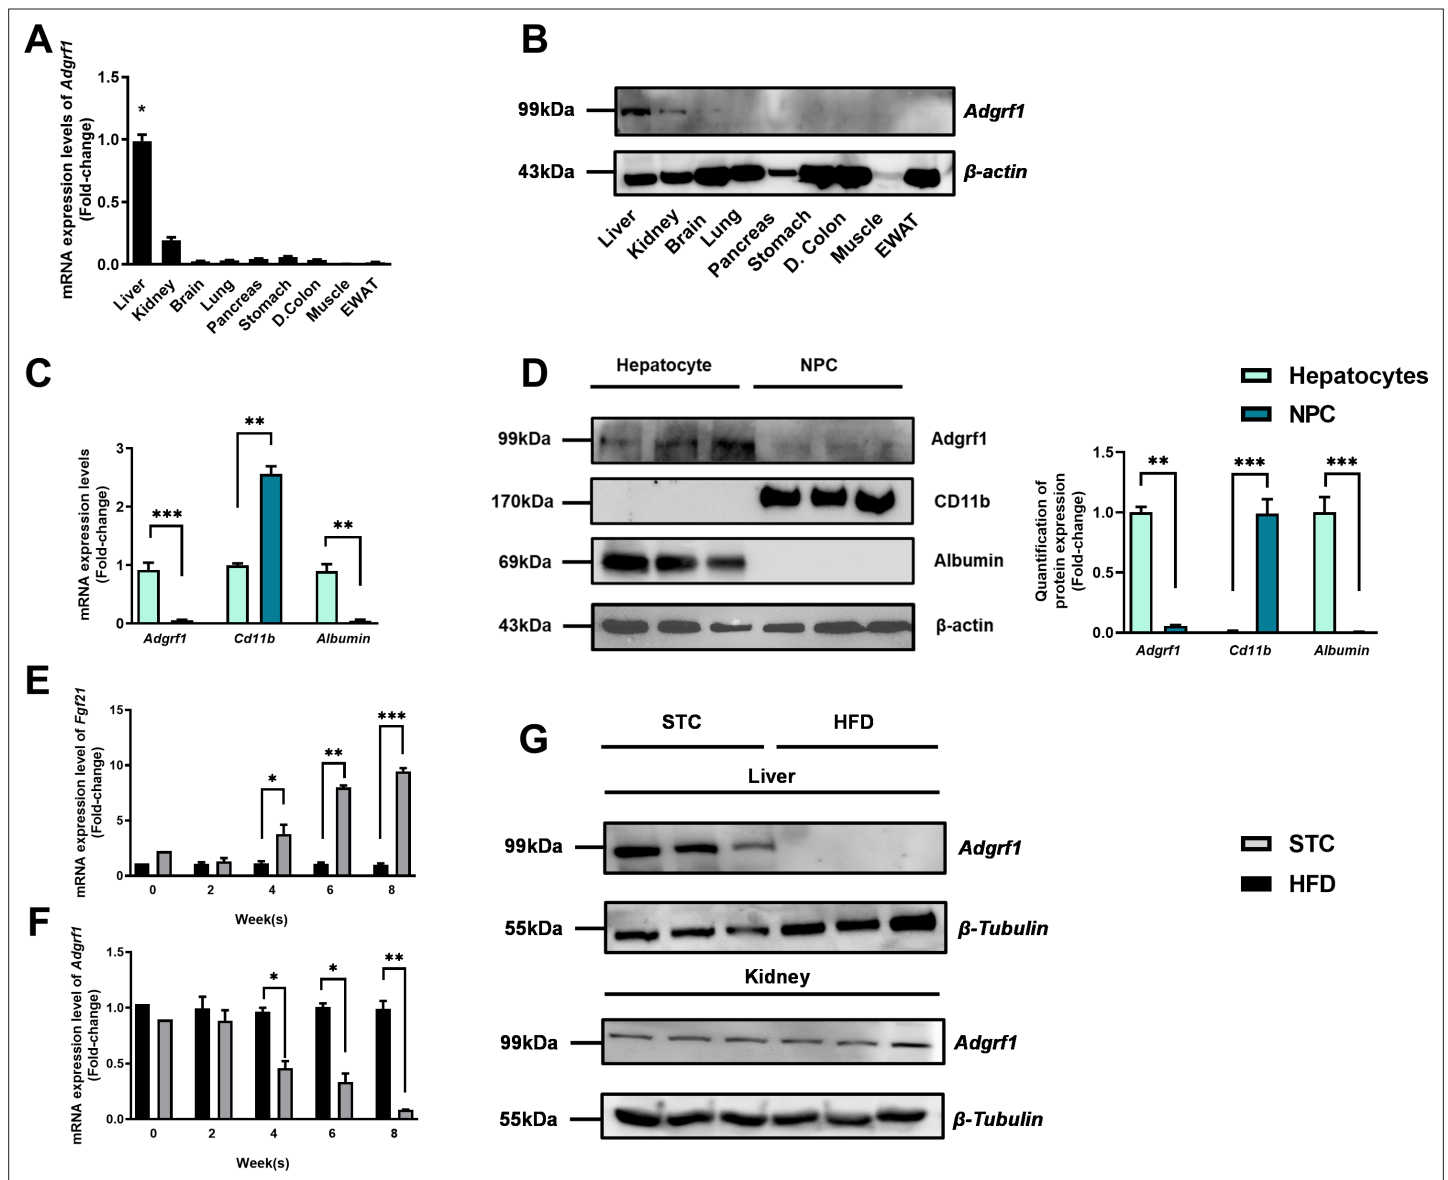

**Figure 1.** *Adgrf1* is mainly expressed in the liver and its expression is downregulated after HFD treatment. Eight-week-old male C57BL/6J mice were fed with either STC or HFD for 8 wk. **(A)** mRNA expression levels of *Adgrf1* in different organs as determined by RT-qPCR analysis ( $n = 5$ ). **(B)** Representative immunoblotting analyses of *Adgrf1* expression in different tissues of C57BL/6J mice after STC for 8 wk ( $n = 3$ ). **(C)** mRNA expression levels of *Adgrf1*, *Cd11b*, and *Albumin* in fractions of hepatocyte or NPCs isolated from STC-fed mice livers as determined by RT-qPCR. **(D)** Left panel: representative immunoblotting analyses of *Adgrf1*, *Cd11b*, and *Albumin* in fractions of hepatocytes or NPC isolated from mice livers fed with STC, each lane is a sample from different individual; right panel: quantification of protein expression levels of *Adgrf1*, *Cd11b*, and *Albumin*. Protein expression levels were normalized to the expression of  $\beta$ -actin. The fraction of hepatocytes was set as 1 for fold-change calculation. **(E)** mRNA expression levels of *Fgf21* in mice liver fed with 0, 2, 4, 6, and 8 wk of HFD as determined by RT-qPCR. **(F)** mRNA expression levels of *Adgrf1* in mice liver fed with 0, 2, 4, 6, and 8 wk of HFD as determined by RT-qPCR. **(G)** Left panel: representative immunoblotting analyses of *Adgrf1* in mice fed with either STC or HFD for 8 wk; right panel: quantification of protein expression levels of *Adgrf1*. Protein expression levels were normalized to the expression of  $\beta$ -tubulin. The sample from STC mice was set as 1 for fold-change calculation. Each lane is a sample from different individual. *Adgrf1*, G-protein-coupled receptor 110; STC, standard chow diet; HFD, high-fat diet; NPC, non-parenchymal cell. Data represented as mean  $\pm$  SEM; repeated with three independent experiments; p-value analyzed by two-tailed Student's t-test. \* $p < 0.05$ , \*\* $p < 0.01$ , \*\*\* $p < 0.001$ .

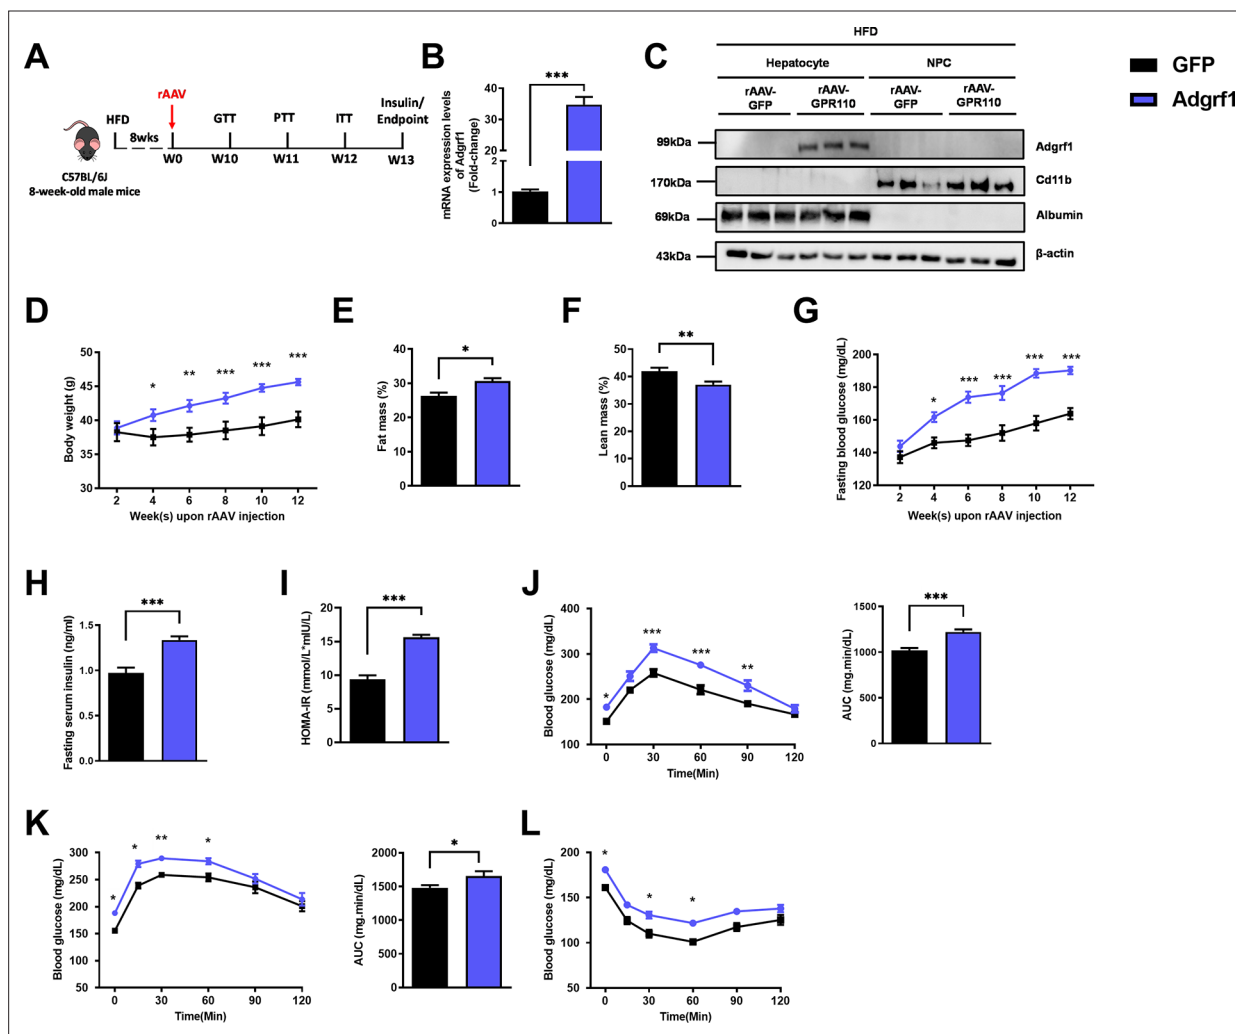

**Figure 2.** Overexpression of *Adgrf1* in hepatocytes exaggerates metabolic dysregulation by HFD treatment. Eight-week-old male C57BL/6J mice were infected with  $3 \times 10^{11}$  copies of rAAV encoding *Adgrf1* (rAAV-*Adgrf1*, i.v.) or control (rAAV-GFP, i.v.) and received HFD feeding, respectively. (A) Schematic illustration of viral treatments. (B) Hepatic mRNA expression levels of *Adgrf1* from rAAV-*Adgrf1* mice liver in fractions of hepatocyte or NPCs isolated from HFD-fed mice livers as determined by RT-qPCR. (C) Immunoblotting analyses of *Adgrf1*, *Cd11b*, and albumin from rAAV-*Adgrf1* mice liver in fractions of hepatocyte or NPC isolated from HFD-fed mice livers. Each lane is a sample from a different individual. (D) Body weight, (E) the percentage of fat mass, and (F) lean mass were assessed in different groups. (G) Fasting blood glucose levels were measured biweekly upon rAAV injection. (H) The fasting serum insulin level and (I) HOMA-IR index were measured and calculated according to the formula [Fasting blood glucose (mmol/L)  $\times$  Fasting blood insulin (mIU/L)]/22.5 for the HFD-fed rAAV-*Adgrf1* or rAAV-GFP mice at the end of the experiment. (J) GTT (1 g/kg BW, left) and area under curve (AUC, right) of serum glucose at week 10. (K) PTT (1 g/kg BW, left) and AUC (right) of serum glucose at week 11. (L) ITT (0.5 U/kg BW, left) and AUC (right) of serum glucose at week 12. mRNA expression levels of the target genes were normalized to the expression of mouse *Gapdh*. rAAV-NC group was set as 1 for fold-change calculation.  $n = 8$  per group. *Adgrf1*, G-protein-coupled receptor 110; STC, standard chow diet; HFD, high-fat diet; NPC, non-parenchymal cell; BW, body weight; GTT, glucose tolerance test; PTT, pyruvate tolerance test; ITT, insulin tolerance test; AUC, area under curve; NC, negative control; HOMA-IR, homeostasis model assessment-estimated insulin resistance. Data represents as mean  $\pm$  SEM; repeated with three independent experiments; p-value analyzed by two-tailed Student's t-test. \* $p < 0.05$ , \*\* $p < 0.01$ , \*\*\* $p < 0.001$ .

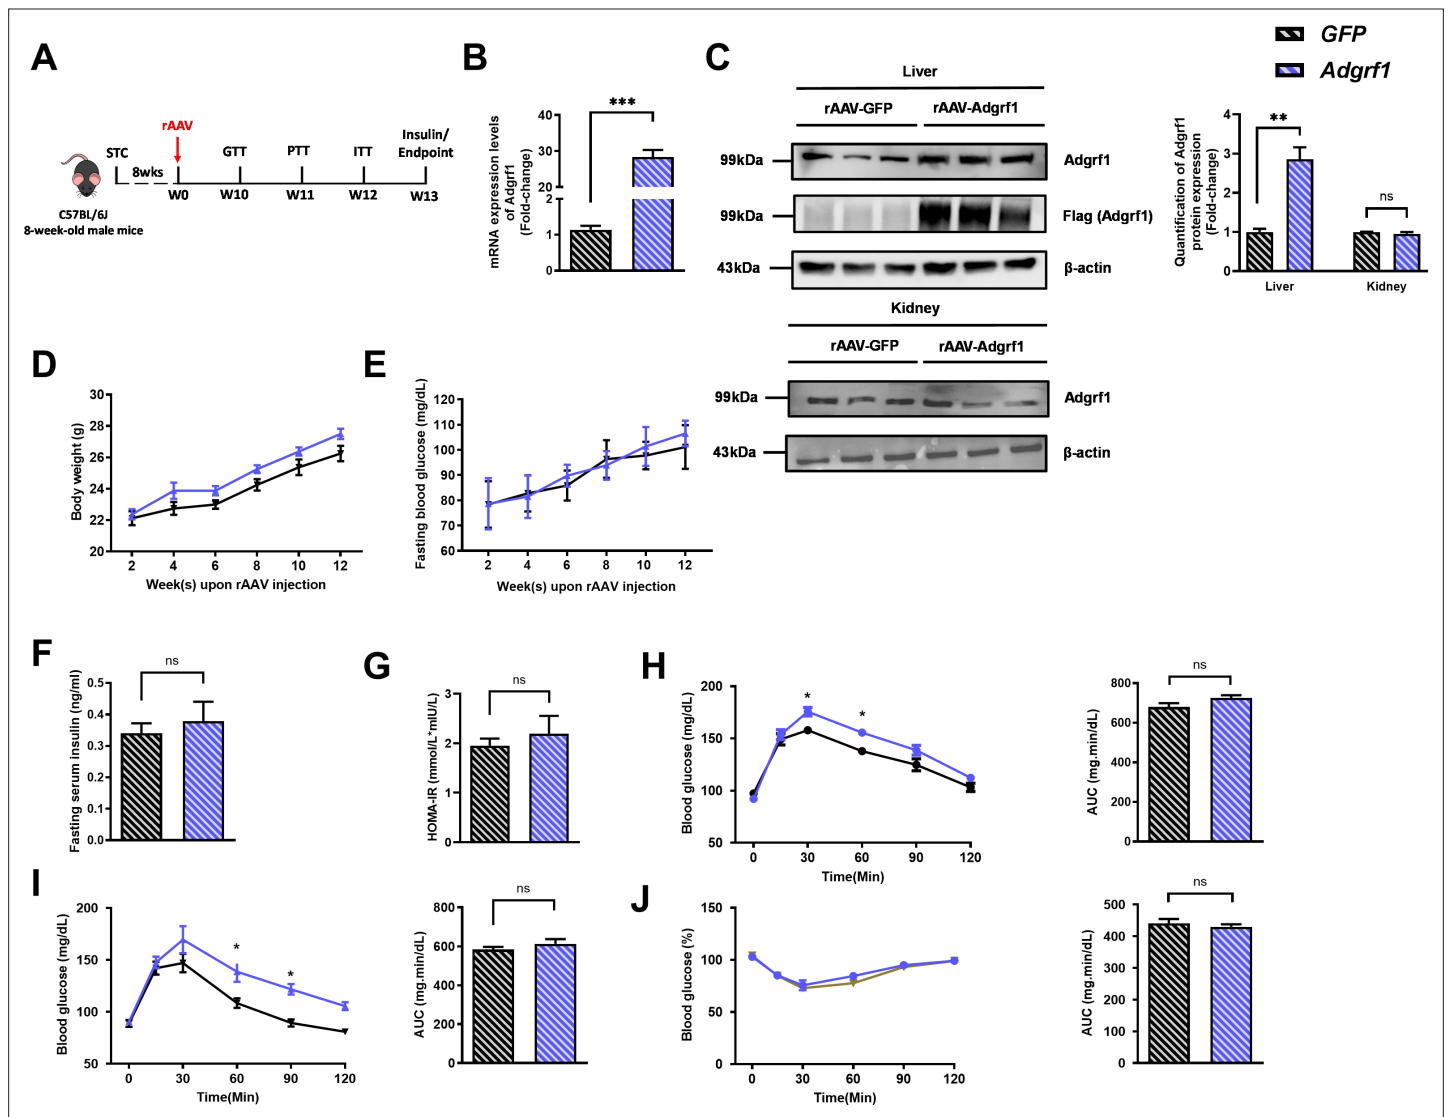

**Figure 2—figure supplement 1.** Hepatic overexpression of *Adgrf1* in STC-fed mice exhibits mild metabolic abnormalities. Eight-week-old male C57BL/6J mice were infected with  $3 \times 10^{11}$  copies of AAV encoding *Adgrf1* (rAAV-*Adgrf1*, i.v.) or control (rAAV-GFP, i.v.) and fed with STC diet. (A) Schematic illustration of viral treatments. (B) Hepatic mRNA expression levels of *Adgrf1* from STC-fed mice with liver-specific *Adgrf1* overexpression as determined by RT-qPCR analysis. (C) Left panel: immunoblotting analysis of hepatic protein expression level of *Adgrf1* from STC-fed mice liver with *Adgrf1* overexpression. Right panel: quantification of hepatic protein expression levels of *Adgrf1*. Each lane is a sample from a different individual;  $n = 3$  per group. (D) Change of body weight and (E) fasting blood glucose at different weeks upon rAAV injection were measured. (F) Fasting blood insulin level and (G) HOMA-IR values were measured and calculated at the end of the experiment. (H) GTT (1 g/kg BW, left) and area under curve (AUC, right) of serum glucose at the week of 10. (I) PTT (1 g/kg BW, left) and AUC (right) of serum glucose at week 11. (J) ITT (0.5 U/kg BW, left) and AUC (right) of serum glucose at week 12. mRNA expression levels of the target genes were normalized to the expression of mouse *Gapdh*.  $n = 8$  per group. STC, standard chow diet; BW, body weight; i.v., intravenous injection; GTT, glucose tolerance test; PTT, pyruvate tolerance test; ITT, insulin tolerance test; AUC, area under curve; NC, negative control; HOMA-IR, homeostasis model assessment-estimated insulin resistance. Data represented as mean  $\pm$  SEM; repeated with three independent experiments; p-value analyzed by two-tailed Student's t-test. \* $p < 0.05$ , \*\* $p < 0.01$ , \*\*\* $p < 0.001$ .



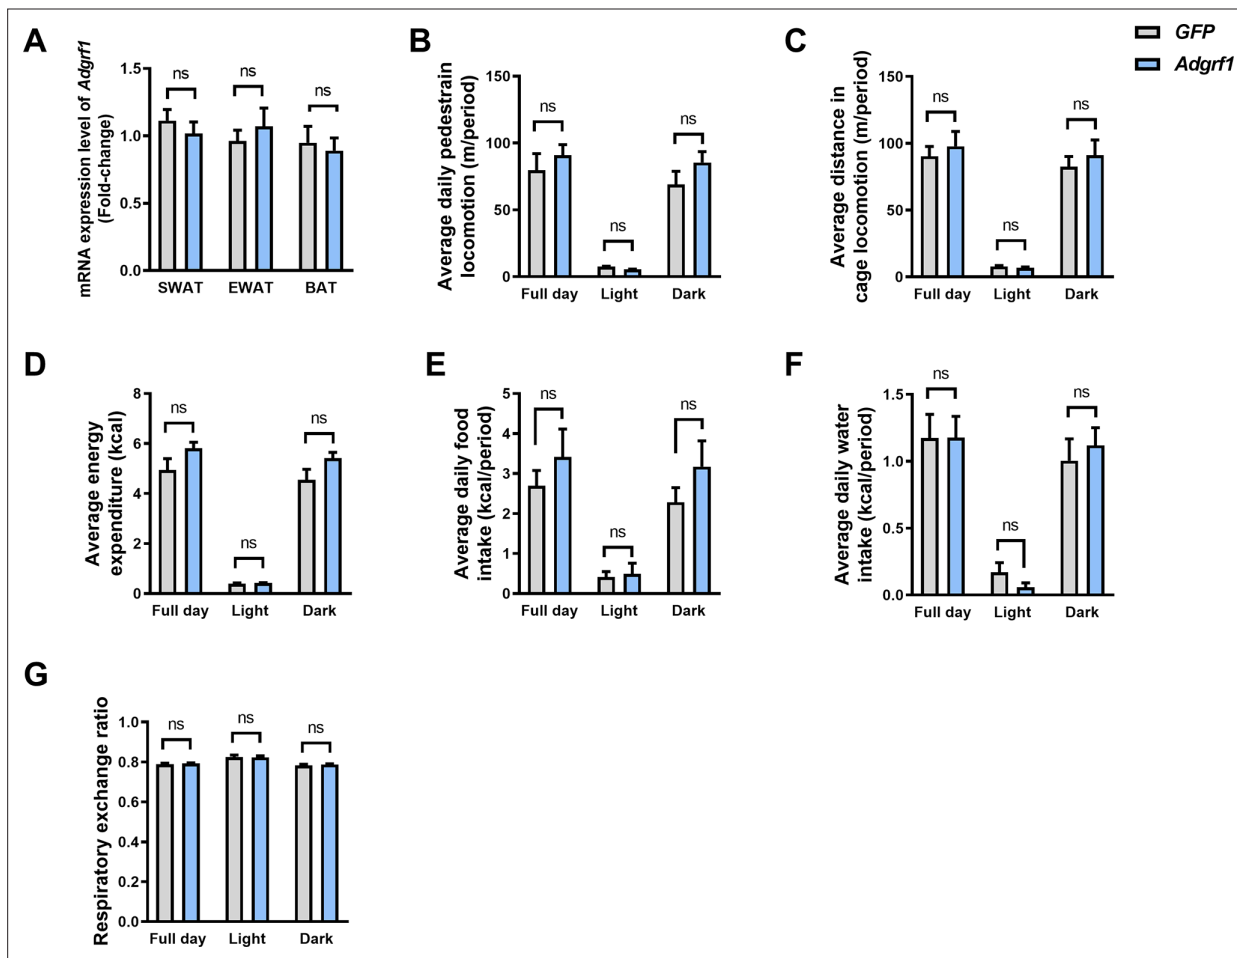

**Figure 2—figure supplement 2.** Overexpression of *Adgrf1* did not interfere adipose tissues and other metabolic phenotypes. (A) mRNA expression levels of *Adgrf1* in SWAT, EWAT, and BAT as determined by RT-qPCR analysis. (B) The average daily pedestrian locomotion, (C) average distance in cage locomotion, (D) average energy expenditure, (E) average daily food intake, (F) average daily water intake, and (G) respiratory exchange ratio was measured.  $n = 4$  per group. SWAT, subcutaneous adipose tissue; EWAT, epididymal white adipose tissue; BAT, brown adipose tissue. Data represented as mean  $\pm$  SEM; repeated with three independent experiments; p-value analyzed by two-tailed Student's *t*-test. \* $p < 0.05$ , \*\* $p < 0.01$ , \*\*\* $p < 0.001$ .

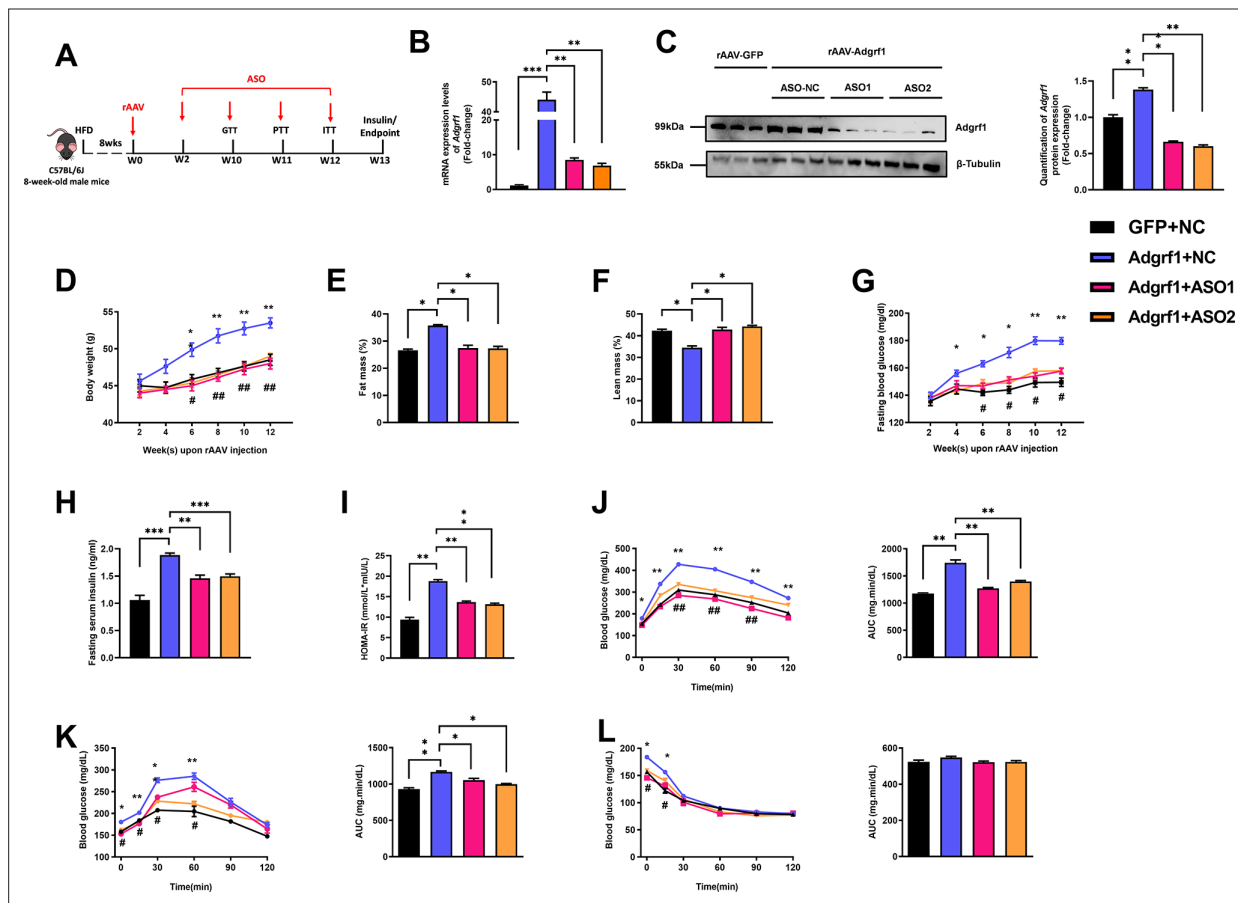

**Figure 3.** Deletion of hepatic *Adgrf1* protects against diet-induced glucose intolerance in *Adgrf1* overexpress mice. Eight-week-old male C57BL/6J mice were infected with either  $3 \times 10^{11}$  copies of rAAV encoding *Adgrf1* (rAAV-*Adgrf1*, i.v.) or control (rAAV-GFP, i.v.) and two different sequences of *Adgrf1* ASO (ASO1-*Adgrf1*, ASO2-*Adgrf1*, 5 mg/kg, one dose per week, s.c.) or scrambled control (ASO-NC, s.c.) received HFD feeding, respectively. (A) Schematic illustration of viral treatments. (B) Hepatic mRNA expression levels of *Adgrf1* from different groups of mice received either GFP-NC, *Adgrf1*-NC, *Adgrf1*-ASO1, or *Adgrf1*-ASO2 fed with HFD, respectively, as determined by RT-qPCR analysis. (C) Left panel: immunoblotting analyses of *Adgrf1* and  $\beta$ -tubulin from livers of HFD-fed rAAV-GFP or rAAV-*Adgrf1* mice treated with either ASO-NC or ASO-*Adgrf1*. Each lane is a sample from a different individual. Right panel: quantification of protein expression levels of *Adgrf1* and  $\beta$ -tubulin. Protein expression levels were normalized to the expression of  $\beta$ -tubulin. (D) BW was measured biweekly upon rAAV and ASO injection. (E) The percentage of fat mass and (F) the percentage of lean mass were measured at the end of the experiment. (G) The fasting blood glucose level of different groups was measured upon rAAV and ASO injection. (H) Fasting serum insulin level and (I) HOMA-IR index were measured and calculated according to the formula [Fasting blood glucose (mmol/l)  $\times$  Fasting blood insulin (mIU/l)]/22.5 for the HFD-fed rAAV-*Adgrf1* or rAAV-GFP mice at the end of the experiment. (J) GTT (1 g/kg BW, left) and AUC (right) of serum glucose at week 10. (K) PTT (1 g/kg BW, left) and AUC (right) of serum glucose at week 11. (L) ITT (0.5 U/kg BW, left) and AUC (right) of serum glucose at week 12. mRNA expression levels of the target genes were normalized to the expression of mouse *Gapdh*. rAAV-NC group was set as 1 for fold-change calculation.  $n = 8$  per group. STC, standard chow diet; HFD, high-fat diet; ASO, antisense oligonucleotides; BW, body weight; GTT, glucose tolerance test; PTT, pyruvate tolerance test; ITT, insulin tolerance test; AUC, area under curve; NC, negative control; HOMA-IR, homeostasis model assessment-estimated insulin resistance. Data represented as mean  $\pm$  SEM; repeated with three independent experiments; p-value analyzed by two-tailed Student's t-test. \* $p < 0.05$ , \*\* $p < 0.01$ , \*\*\* $p < 0.001$ .

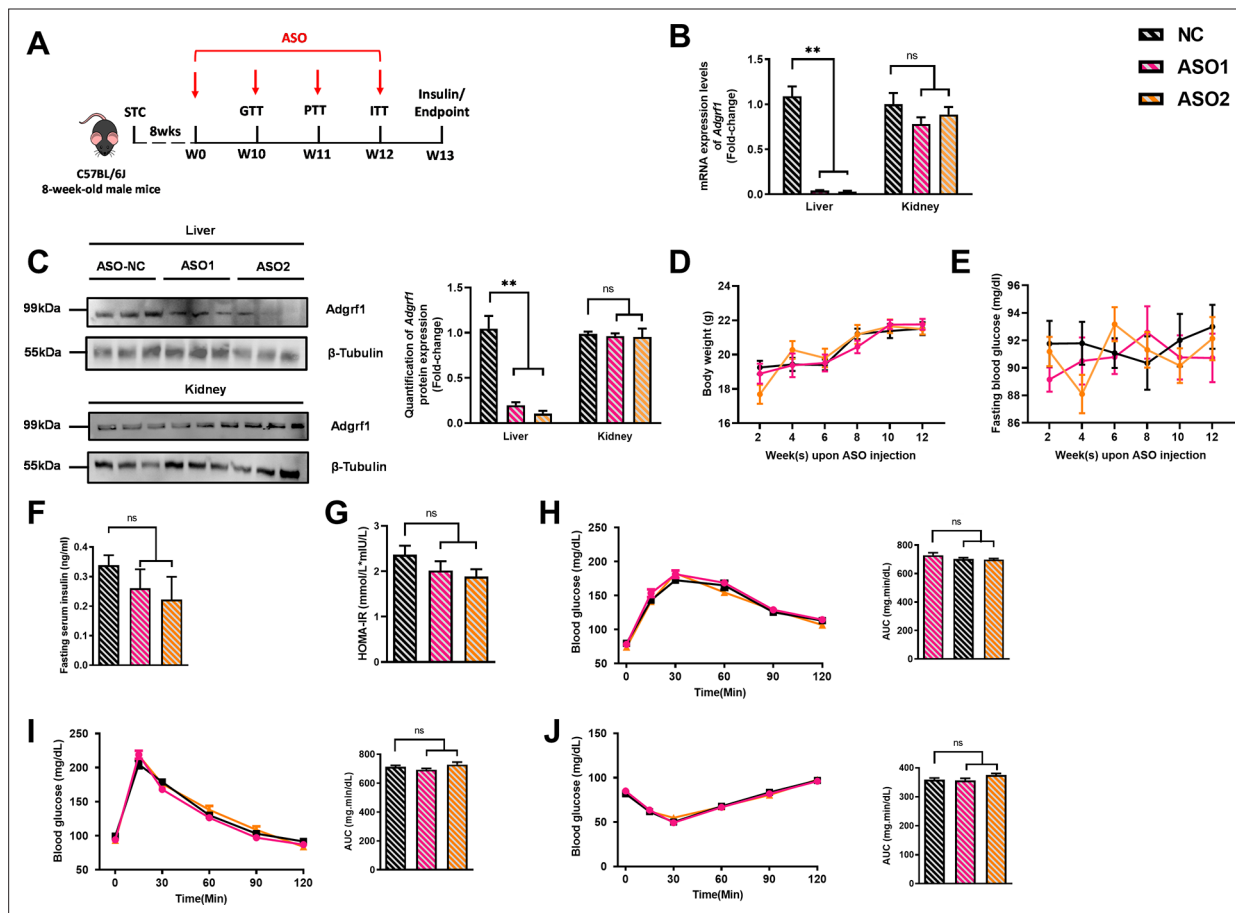

**Figure 3—figure supplement 1.** Hepatic knockdown of *Adgrf1* in STC-fed mice does not exhibit metabolic abnormalities. Eight-week-old male C57BL/6J mice were infected with two different sequences of *Adgrf1* antisense oligonucleotides (ASO1-*Adgrf1*, ASO2-*Adgrf1*, 5 mg/kg, one dose per week, s.c.) or scrambled control (ASO-NC, s.c.) received STC feeding, respectively. **(A)** Schematic illustration of viral treatments. **(B)** mRNA expression levels of *Adgrf1* in liver and kidney as determined by RT-qPCR analysis. mRNA expression levels of *Adgrf1* in different tissues were normalized to the expression of mouse *Gapdh*. **(C)** Left panel: immunoblotting analysis of hepatic protein expression level of *Adgrf1* from STC-fed mice liver with *Adgrf1* knockdown. Right panel: quantification of hepatic protein expression levels of *Adgrf1*. Each lane is a sample from a different individual. **(D)** Change of body weight and **(E)** fasting blood glucose at different weeks upon rAAV injection were measured. **(F)** Fasting blood insulin level and **(G)** HOMA-IR values were measured and calculated at the end the experiment. **(H)** GTT (1 g/kg BW, left) and area under curve (AUC, right) of serum glucose at the week of 10. **(I)** PTT (1 g/kg BW, left) and AUC (right) of serum glucose at week 11. **(J)** ITT (0.5 U/kg BW, left) and AUC (right) of serum glucose at week of 12. mRNA expression levels of the target genes were normalized to the expression of mouse *Gapdh*. STC, standard chow diet; s.c., subcutaneous injection; ASO, antisense oligonucleotides; BW, body weight; GTT, glucose tolerance test; PTT, pyruvate tolerance test; ITT, insulin tolerance test; AUC, area under curve; NC, negative control; HOMA-IR, homeostasis model assessment-estimated insulin resistance. Data represented as mean  $\pm$  SEM;  $n = 8$  mice per group; repeated with three independent experiments;  $p$ -value analyzed by two-tailed Student's  $t$ -test. \* $p < 0.05$ , \*\* $p < 0.01$ , \*\*\* $p < 0.001$ .

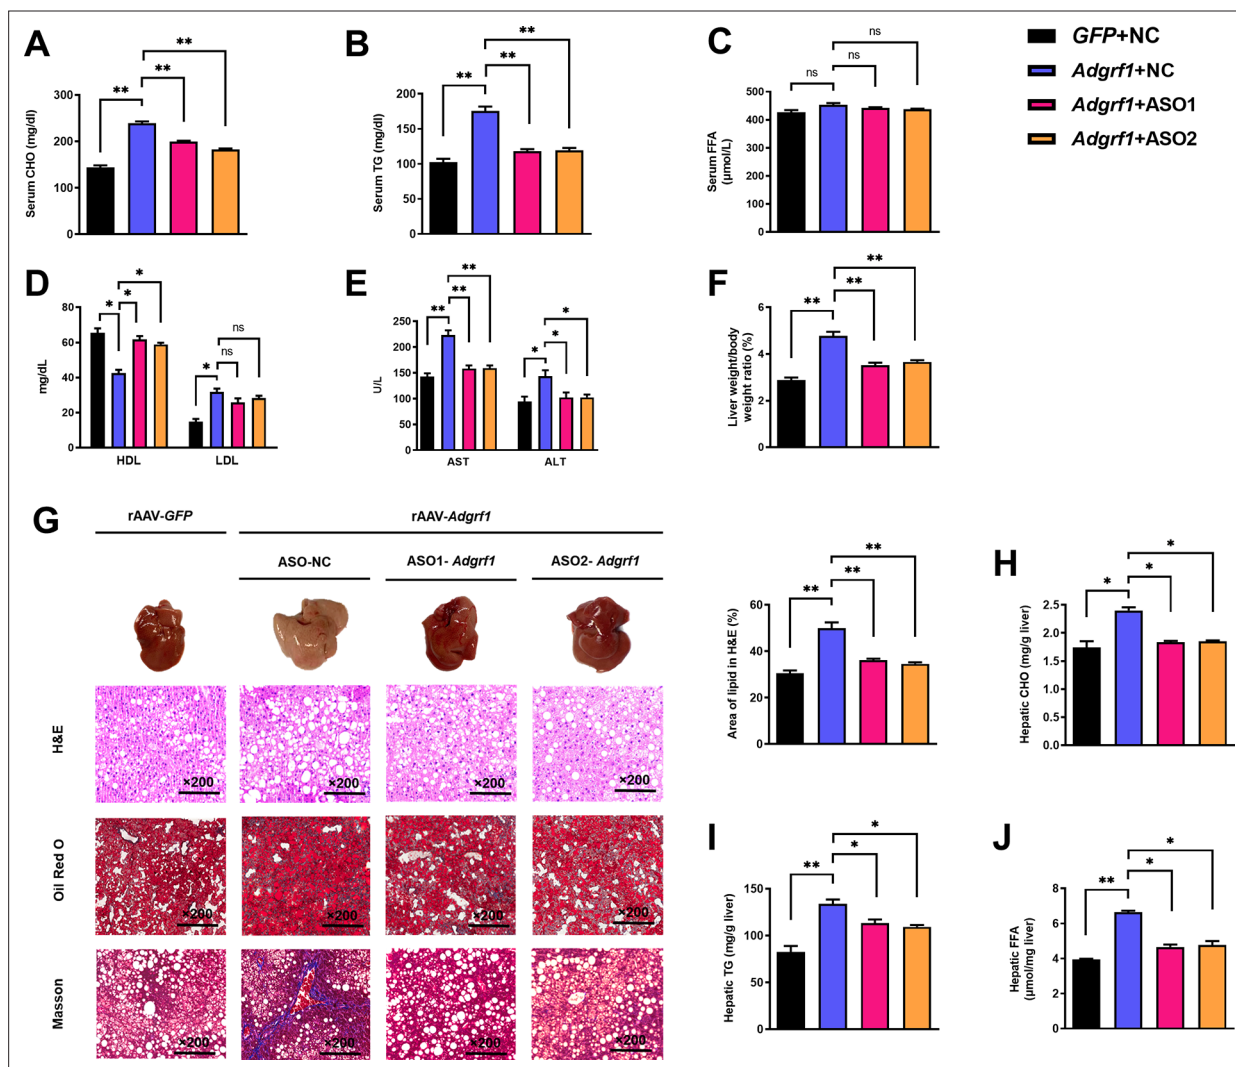

**Figure 4.** Upregulation of hepatic *Adgrf1* exaggerates liver steatosis in HFD-fed mice while downregulation of hepatic *Adgrf1* protects mice from diet-induced liver lipid accumulation. Eight-week-old male C57BL/6J mice were infected with either  $3 \times 10^{11}$  copies of rAAV encoding *Adgrf1* (rAAV-*Adgrf1*, i.v.) or control (rAAV-NC, i.v.) and two different sequences of *Adgrf1* antisense oligonucleotides (ASO1-*Adgrf1*, ASO2-*Adgrf1*, 5 mg/kg, one dose per week, s.c.) or scrambled control (ASO-NC, s.c.) received HFD feeding, respectively. (A) Serum CHO, (B) serum TG, and (C) serum FFA levels were measured at week 13. (D) Serum HDL and LDL. (E) The levels of serum AST ALT. (F) The ratio of the liver weight against body weight was calculated after sacrificing the mice from four different groups. (G) Representative gross pictures of liver tissues (upper panels), representative images of H&E (middle panels) and Oil Red O (lower panels) staining of liver sections (200 μm). The percentage of lipid area according to H&E staining (right panel). (H) Hepatic CHO, (I) hepatic TG, and (J) hepatic FFA were normalized by the weight of liver samples used for lipid extraction.  $n = 8$  per group. i.v., intravenous injection; s.c., subcutaneous injection; STC, standard chow diet; HFD, high-fat diet; ASO, antisense oligonucleotides; BW, body weight; CHO, cholesterol; TG, triglyceride; FFA, free fatty acid; HDL, high-density lipoprotein; LDL, low-density lipoprotein; AST, aspartate transaminase; ALT, alanine transaminase; H&E, hematoxylin-eosin. Data represented as mean  $\pm$  SEM; repeated with three independent experiments; p-value analyzed by two-tailed Student's t-test. \* $p < 0.05$ , \*\* $p < 0.01$ , \*\*\* $p < 0.001$ .

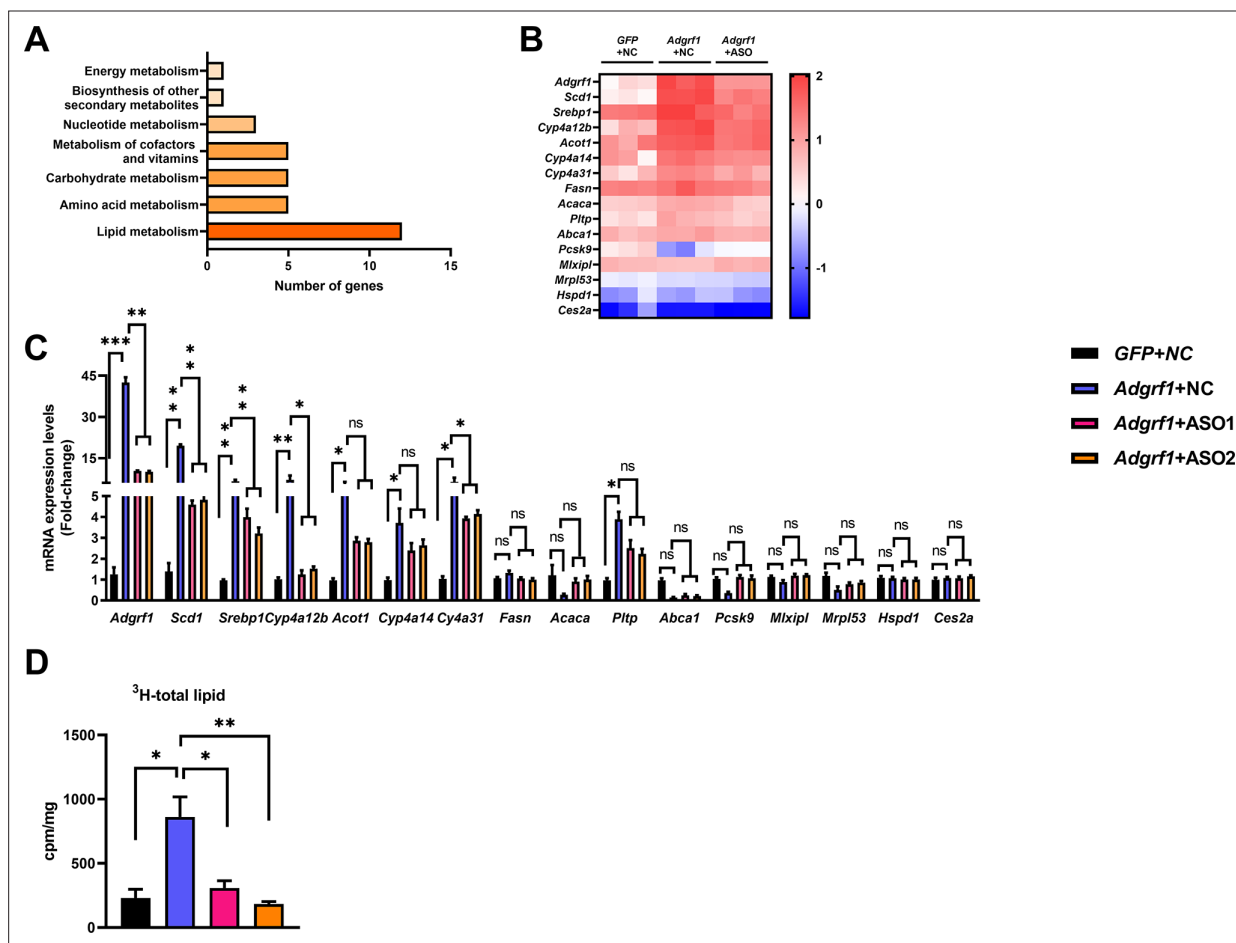

**Figure 5.** *Adgrf1* is a major regulator of hepatic lipid metabolism. Eight-week-old male C57BL/6J mice were infected with either  $3 \times 10^{11}$  copies of rAAV encoding *Adgrf1* (rAAV-*Adgrf1*, i.v.) or control (rAAV-NC, i.v.) and two *Adgrf1* antisense oligonucleotides (ASO1-*Adgrf1*, ASO2-*Adgrf1*, 5 mg/kg, one dose per week, s.c.) or scrambled control (ASO-NC, s.c.) and received HFD feeding, respectively. Mice were sacrificed and mRNA of liver from each group were extracted and RNA-seq analysis was conducted. **(A)** KEGG pathway assay of differential mRNA transcripts in rAAV and ASO groups identified by RNA-seq. **(B)** Heat map shows the log<sub>2</sub> scale fold change in the expression levels of a set of genes involved in lipid metabolism from RNA seq data of livers in HFD-fed mice treated by rAAV-*Adgrf1* or rAAV-*Adgrf1* plus *Adgrf1*-ASO1.  $n = 3$  per group. **(C)** mRNA expression levels of genes according to the heat map from different groups of mice received either GFP-NC, *Adgrf1*-NC, *Adgrf1*-ASO1, or *Adgrf1*-ASO2 fed with HFD, respectively, as determined by RT-qPCR analysis,  $n = 6$  mice per group. **(D)** De novo lipogenic activity was measured the <sup>3</sup>H labeling of lipogenic Acetyl-CoA from 0.5 μCi <sup>3</sup>H-acetate. ASO, antisense oligonucleotides. STC, standard chow diet; HFD, high-fat diet; i.v., intravenous injection; s.c., subcutaneous injection; ASO, antisense oligonucleotides; KEGG, Kyoto Encyclopedia of Genes and Genomes; GEO, gene expression omnibus; NAFLD, non-alcoholic fatty liver disease. Data represented as mean  $\pm$  SEM; p-value analyzed by two-tailed Student's t-test. \* $p < 0.05$ , \*\* $p < 0.01$ , \*\*\* $p < 0.001$ .

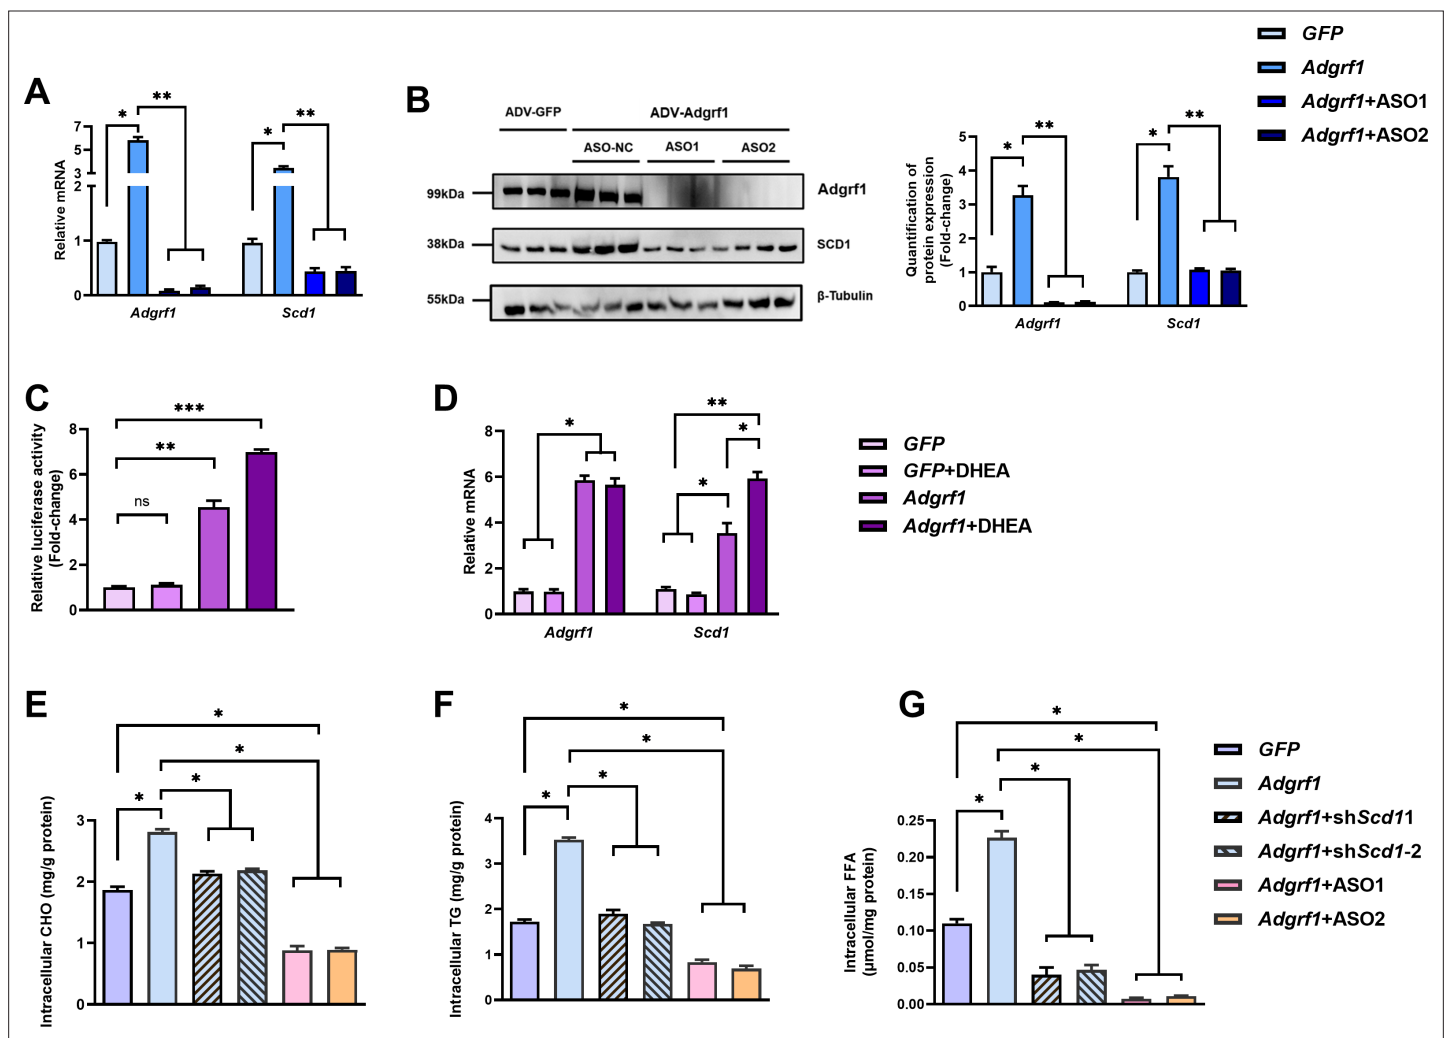

**Figure 6.** *Scd1* expression is regulated by *Adgrf1* in primary hepatocytes. Primary hepatocytes were isolated from 8-week-old male C57BL/6J mice with STC. (A) Primary hepatocytes were infected with either adenoviral vector expressing *Adgrf1* (ADV-*Adgrf1*) or control adenovirus expressing GFP (ADV-GFP) 24 hr after plating, followed by transfection with ASO1-*Adgrf1*, ASO2-*Adgrf1*, or ASO-NC for another 6 hr ( $n = 6$ ). mRNA expression levels of *Adgrf1* and *Scd1* from different groups were assessed, as determined by RT-qPCR analysis. (B) Left panel: immunoblotting analysis for the expression level of *Adgrf1* and *Scd1* from different groups of primary hepatocytes. Right panel: quantification of protein expression levels of *Adgrf1* and *Scd1*. Protein expression levels were normalized to the expression of  $\beta$ -tubulin. Each lane is a sample from a different plate. Right panel: quantification of protein expression levels of *Adgrf1*, *Scd1*, and  $\beta$ -tubulin.  $n = 3$  per group. Protein expression levels were normalized to the expression of  $\beta$ -tubulin. The samples for GFP were set as 1 for fold-change calculation. (C, D) HEK293T cells were infected with pGL3-*Scd1* promoter-luciferase plasmid and adenoviral vector expressing *Adgrf1* (ADV-*Adgrf1*) or GFP (ADV-GFP) for 48 hr and DHEA was added to the transfected cells at the concentration of 100  $\mu$ M for 24 hr. Cell lysates were used for (C) luciferase assay or (D) RT-qPCR analysis ( $n = 3$ ). Lysates from the cell co-transfection with pGL3-*Scd1* promoter-luciferase plasmid and ADV-GFP without treatment of DHEA was set as 1 for fold-change calculation. (E–G) Primary hepatocytes were infected with either adenoviral vector expressing *Adgrf1* (ADV-*Adgrf1*) or control ADV-GFP, followed by transfecting with scramble or sh*Scd1*-1 or sh*Scd1*-2 plasmids for another 72 hr. Intracellular lipids were extracted and (E) CHO, (F) TG, and (G) FFA were assessed ( $n = 3$ ). STC, standard chow diet; i.v., intravenous injection; s.c., subcutaneous injection; ASO, antisense oligonucleotides. CHO, cholesterol; TG, triglyceride; FFA, free fatty acid. Data represented as mean  $\pm$  SEM; repeated with three independent experiments; p-value analyzed by two-tailed Student's *t*-test. \* $p < 0.05$ , \*\* $p < 0.01$ , \*\*\* $p < 0.001$ .

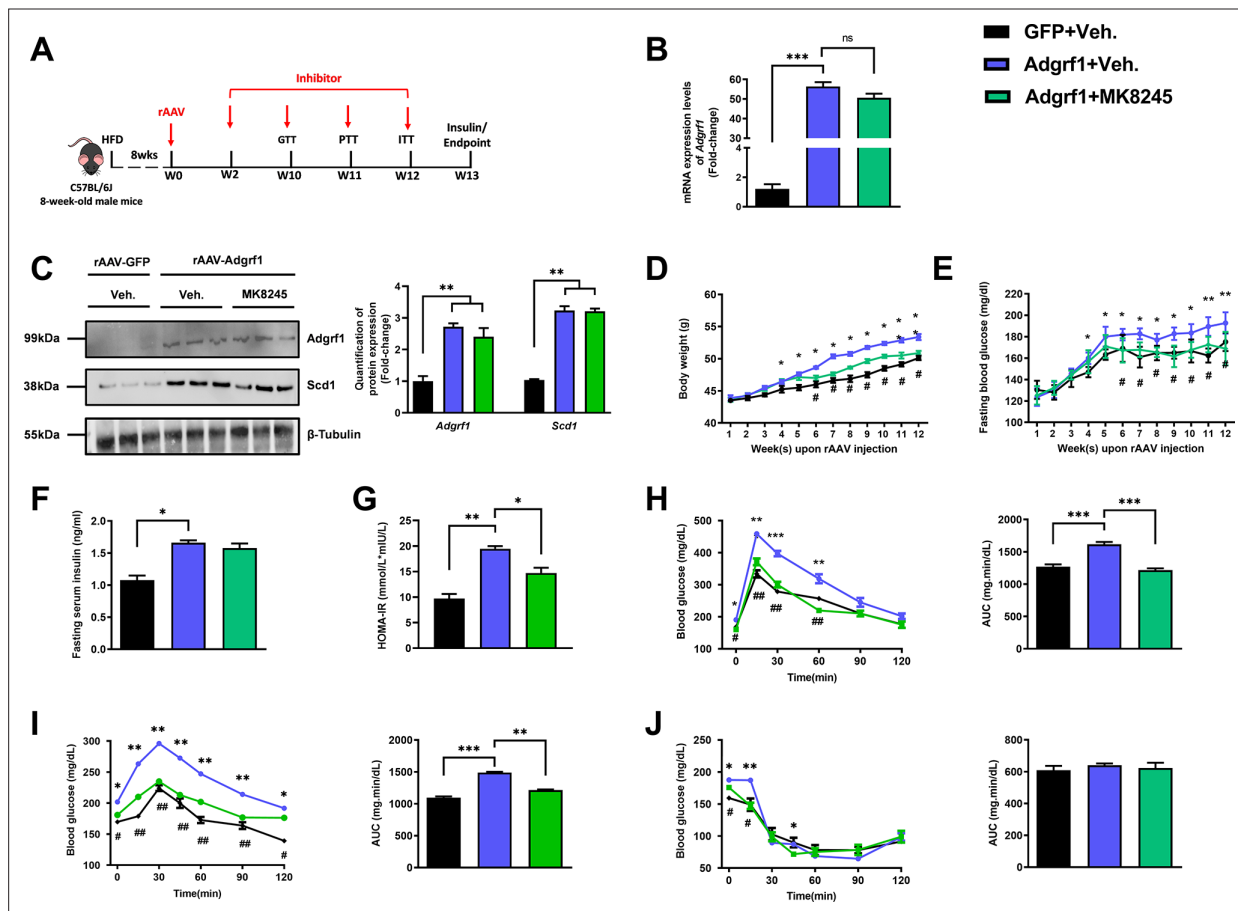

**Figure 7.** Inhibition of *Scd1* alleviates the glucose impairment in mice with hepatic *Adgrf1* overexpression. Eight-week-old male C57BL/6J mice were infected with either  $3 \times 10^{11}$  copies of rAAV encoding *Adgrf1* (rAAV-*Adgrf1*, i.v.) or control (rAAV-GFP, i.v.) and *Scd1* inhibitor (MK8245, 10 mg/kg/week, p.o.) or inhibitor vehicle (inhibitor-Veh., p.o.) received HFD feeding. **(A)** Schematic illustration of viral treatments. **(B)** Hepatic mRNA expression levels of *Adgrf1* from different groups of mice received rAAV and inhibitor fed with HFD, respectively, as determined by RT-qPCR analysis. **(C)** Left panel: immunoblotting analysis for the hepatic protein expression level of *Adgrf1* and *Scd1* from different groups of mice fed with HFD. Right panel: quantification of protein expression levels of *Adgrf1* and *Scd1*. Protein expression levels were normalized to the expression of  $\beta$ -tubulin. Each lane is a sample from a different individual. **(D)** BW and **(E)** fasting blood glucose level were measured at different weeks upon rAAV and inhibitor injection. **(F)** The fasting blood insulin level and **(G)** HOMA-IR index were measured and calculated according to the formula [Fasting blood glucose (mmol/l)  $\times$  Fasting blood insulin (mU/l)]/22.5 for the HFD-fed rAAV-*Adgrf1* or rAAV-GFP mice at the end of the experiment. **(H)** GTT (1 g/kg BW, left) and AUC (right) of serum glucose at the week of 10. **(I)** PTT (1 g/kg BW, left) and AUC (right) of serum glucose at week 11. **(J)** ITT (0.5 U/kg BW, left) and AUC (right) of serum glucose at week of 12. mRNA expression levels of the target genes were normalized to the expression of mouse *Gapdh*. rAAV-NC group was set as 1 for fold-change calculation.  $n = 8$  per group. HFD, high-fat diet; i.v., intravenous injection; p.o., oral administration; ASO, antisense oligonucleotides; BW, body weight; GTT, glucose tolerance test; PTT, pyruvate tolerance test; ITT, insulin tolerance test; AUC, area under curve; NC, negative control; HOMA-IR, homeostasis model assessment-estimated insulin resistance. Data represented as mean  $\pm$  SEM; repeated with three independent experiments; p-value analyzed by two-tailed Student's t-test. \* $p < 0.05$ , \*\* $p < 0.01$ , \*\*\* $p < 0.001$ .



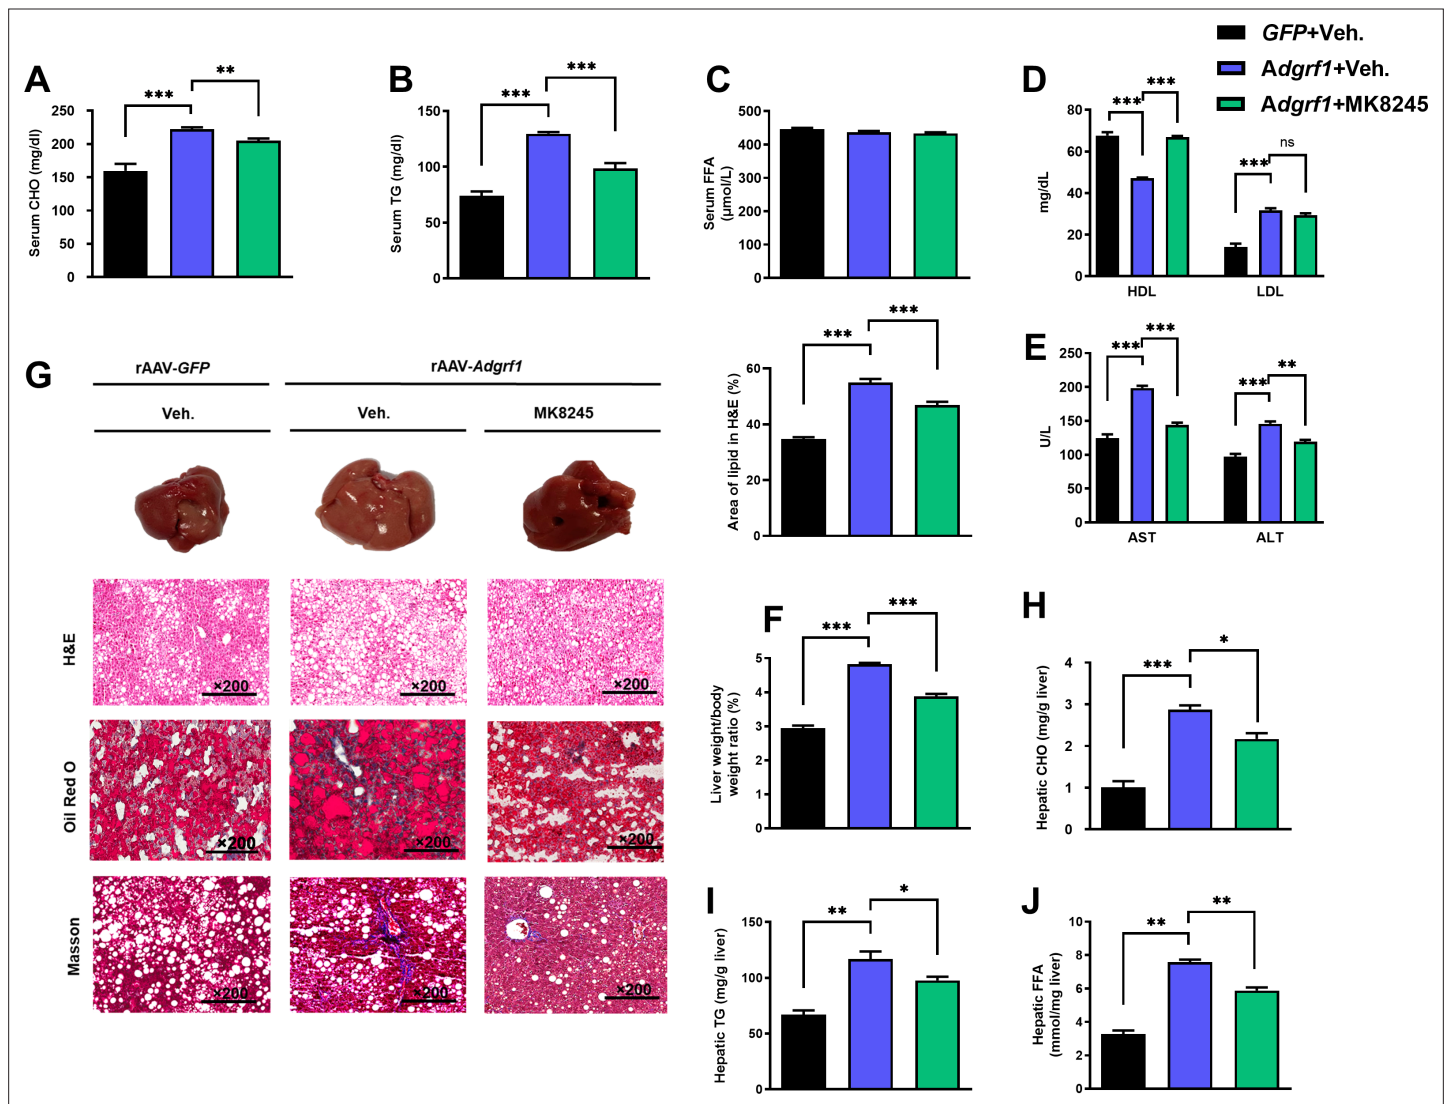

**Figure 8.** Inhibition of hepatic *Scd1* partially alleviates the severity of hepatic steatosis in *Adgrf1* overexpression mice. Eight-week-old male C57BL/6N mice were infected with either  $3 \times 10^{11}$  copies of rAAV encoding *Adgrf1* (rAAV-*Adgrf1*, i.v.) or control (rAAV-GFP, i.v.) and administered with *Scd1* inhibitor (MK8245, 10 mg/kg, p.o.) or inhibitor vehicle (inhibitor-Veh., p.o.) received HFD feeding. (A) Serum CHO, (B) serum TG, and (C) serum FFA levels were measured at the end of experiment. (D) Serum HDL and LDL, (E) AST and ALT level of each group of mice were measured at the end of the experiment. (F) The ratio of the liver weight against body weight was calculated after sacrificing the mice from four different groups. (G) Representative gross pictures of liver tissues (upper panels), representative images of H&E (middle panels) and Oil Red O (lower panels) staining of liver sections (200  $\mu$ m). The percentage of lipid area according to H&E staining (right panel). (H) Hepatic CHO, (I) hepatic TG, and (J) hepatic FFA were normalized by the weight of liver samples used for lipid extraction.  $n = 8$  per group. STC, standard chow diet; HFD, high-fat diet; i.v., intravenous injection; p.o., oral administration; CHO, cholesterol; TG, triglyceride; FFA, free fatty acid; HDL, high-density lipoprotein; LDL, low-density lipoprotein; AST, aspartate transaminase; ALT, alanine transaminase; H&E, hematoxylin-eosin. Data represented as mean  $\pm$  SEM; repeated with three independent experiments; p-value analyzed by two-tailed Student's *t*-test. \* $p < 0.05$ , \*\* $p < 0.01$ , \*\*\* $p < 0.001$ .



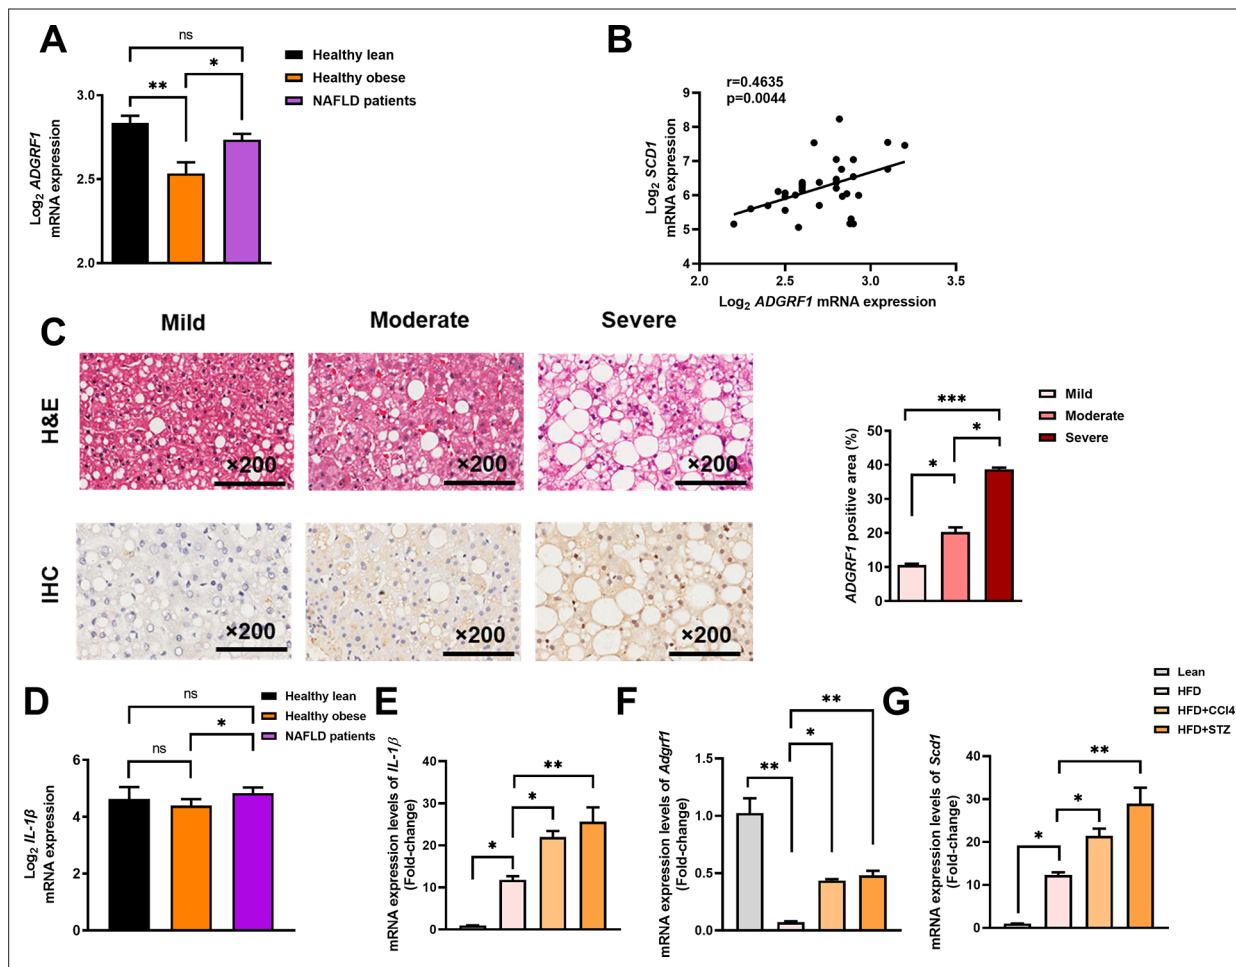

**Figure 9.** Hepatic expression of *ADGRF1* is upregulated in obese patients with hepatic steatosis when compared to those with normal liver morphology, which is positively associated with hepatic *SCD1* expression level. NAFLD patients have higher hepatic expression of *ADGRF1* accompanied with increased mRNA *Scd1* expression. **(A)** Normalized  $\text{Log}_2$  mRNA expression of *ADGRF1* in lean people without NAFLD ( $n = 12$ ), obese people without NAFLD ( $n = 17$ ), or obese patients with NAFLD ( $n = 8$ ) according to the GEO database (GEO; Profile # GDS4881/8126820). **(B)** Correlation between *ADGRF1* and *SCD1* in liver of human subjects based on the GEO database. **(C)** Representative images of liver tissues with H&E staining (upper panels) and immunohistochemical staining (IHC) of *ADGRF1* (lower panels) from patients with different degree of NAFLD (200  $\mu\text{m}$ ). The percentage of *ADGRF1* positive area according to H&E staining (right panel). The percentage of *ADGRF1*-positive areas according to IHC staining (right panel);  $n = 3$  per group. **(D)** Normalized  $\text{Log}_2$  mRNA expression of *IL-1 $\beta$*  in lean people without NAFLD ( $n = 12$ ), obese people without NAFLD ( $n = 17$ ), or obese patients with NAFLD ( $n = 8$ ) according to the GEO database (GEO; Profile # GDS4881/8126820). **(E)** Hepatic mRNA expression levels of *IL-1 $\beta$* , **(F)** *Adgrf1*, and **(G)** *Scd1* in either STC-fed mice or HFD-fed mice treated with CCl4 or STZ as determined by RT-qPCR. Data represented as mean  $\pm$  SEM. p-Value analyzed by two-tailed Student's t-test. \* $p < 0.05$ , \*\* $p < 0.01$ , \*\*\* $p < 0.001$ .
