# Supplementary material for: Amelioration of non-alcoholic fatty liver disease by targeting adhesion G protein-coupled receptor F1 (Adgrf1)
Source: eLife journal article supplement (doi:10.7554/elife.85131), 2023-08-02
Supplement: supp1 [file Supplementary File 1-Source 1.xlsx]

## Sheet: Sheet1
Antibody name	Catalog number	Manufacturer	Dilution
Rabbit anti-GPR110	orb157302	Biorbyt	0.736111
Rabbit anti-SCD1	ab236868,	Abcam	0.736111
Mouse anti-GAPDH	40004-I-Ig	Proteintech	0.736111
Rabbit anti-CD11b	ab133357	Abcam	0.736111
Rabbit anti-albumin	ab207327	Abcam	0.736111
Mouse anti-beta tubulin	66246-I-Ig	Proteintech	0.736111
Mouse anti-beta actin	60008-I-Ig	Proteintech	0.736111
Mouse anti-flag tag	66008-2-Ig	Proteintech	0.736111
