# Supplementary material for: Amelioration of non-alcoholic fatty liver disease by targeting adhesion G protein-coupled receptor F1 (Adgrf1)
Source: eLife journal article supplement (doi:10.7554/elife.85131), 2023-08-02
Supplement: supp2 [file Supplementary File 2-Source 1.xlsx]

## Sheet: Sheet1
Gene name	Primer sequences (5’-3’)
	Forward	Reverse
GPR110	CCAAGAGAAGCCAAACCTCC	TTCGATAAGCCAGCAGGATG
SCD1	CTGACCTGAAAGCCGAGAAG	AGAAGGTGCTAACGAACAGG
GAPDH	ACTCCACTCACGGCAAATTC	TCTCCATGGTGGTGAAGACA
Albumin	ACAGGACACCTGCTCTC	AGTCCTGAGTCCTTCATGTCTTT
F4/80	CTTTGGCTQTGGGCCTTCCAGTC	GCAAGGAGGACAGAGTTTATCGTG
CD11b	ATGGACGCTGATGGCAATACC	TCCCCATTCACGTCTCCCA
Acot1	ACTACGATGACCTCCCCAAG	CATAGCAAGGCCAAGTTCAC
Cy4a12b	GTTCCTACAGATTTCTAGCTCCC	AGAGTCTGCCATGATTTCCG
Cy4a31	CACTCATTCCTGCCCTTCTC	ACAATCACCTTCAGCTCACTC
Acaca	AAGGCTATGTGAAGGATGTGG	CTGTCTGAAGAGGTTAGGGAAG
Pcsk9	TTTTATGACCTCTTCCCTGGC	ATTCGCTCCAGGTTCCATG
Mrpl53	TCAAGCTGGTTCGAGTTCAG	ACAGAGCAGTTGAGGTTGG
Hspd1	AGTGTTCAGTCCATTGTCCC	TGACTGCCACAACCTGAAG
Pltp	CCTGTGCTCTACCATGCTG	ATTCCATATCCAGGTTGCCG
Abca1	TGACATGGTACATCGAAGCC	GATTTCTGACACTCCCTTCTGG
FGF21	ACGACCAAGACACTGAAGC	ACCCAGGATTTGAATGACCC
