# Supplementary material for: Amelioration of non-alcoholic fatty liver disease by targeting adhesion G protein-coupled receptor F1 (Adgrf1)
Source: eLife journal article supplement (doi:10.7554/elife.85131), 2023-08-02
Supplement: supp3 [file Supplementary File 3-Source 1.xlsx]

## Sheet: Sheet1
Gene Accession	Gene Symbol	Gene Description	STC		HFD		p value
			average	SD	average	SD
NM_008308	Htr1a	5-hydroxytryptamine (serotonin) receptor 1A	5.52	0.46	5.67	0.45	0.64018
NM_010482	Htr1b	5-hydroxytryptamine (serotonin) receptor 1B	6.27	0.34	5.97	0.17	0.1344
NM_008309	Htr1d	5-hydroxytryptamine (serotonin) receptor 1D	4.44	0.51	4.14	0.52	0.50166
NM_008310	Htr1f	5-hydroxytryptamine (serotonin) receptor 1F	5.94	0.29	6.03	0.29	0.6058
NM_172812	Htr2a	5-hydroxytryptamine (serotonin) receptor 2A	6.47	0.34	6.74	0.37	0.36038
NM_008311	Htr2b	5-hydroxytryptamine (serotonin) receptor 2B	4.9	0.75	4.86	0.76	0.91875
NM_008312	Htr2c	5-hydroxytryptamine (serotonin) receptor 2C	8.03	0.31	8.22	0.38	0.38376
NM_013561	Htr3a	5-hydroxytryptamine (serotonin) receptor 3A	4.97	0.52	4.86	0.51	0.75293
NM_020274	Htr3b	5-hydroxytryptamine (serotonin) receptor 3B	5.81	0.83	5.75	0.89	0.90944
NM_008314	Htr5a	5-hydroxytryptamine (serotonin) receptor 5A	5.93	0.43	6.05	0.44	0.72994
NM_010483	Htr5b	5-hydroxytryptamine (serotonin) receptor 5B	4.49	0.15	5.28	0.15	0.41513
NM_021358	Htr6	5-hydroxytryptamine (serotonin) receptor 6	5.9	0.39	6.37	0.3	0.24233
NM_008315	Htr7	5-hydroxytryptamine (serotonin) receptor 7	4.63	0.5	4.95	0.46	0.42411
NM_001008533	Adora1	adenosine A1 receptor	7.07	1.04	8.51	0.64	0.00637
NM_009630	Adora2a	adenosine A2a receptor	5.15	0.18	5.44	0.16	0.32188
NM_007413	Adora2b	adenosine A2b receptor	4.74	0.85	5.26	0.61	0.3274
NM_027025	Adora3	adenosine A3 receptor	4.96	0.47	5	0.48	0.90179
NM_009631	Adora3	adenosine A3 receptor	3.94	0.96	4.36	1.07	0.49665
NM_013461	Adra1a	adrenergic receptor, alpha 1a	6.36	0.62	6.99	0.47	0.04982
NM_007416	Adra1b	adrenergic receptor, alpha 1b	8.33	0.62	8.5	0.65	0.66073
NM_013460	Adra1d	adrenergic receptor, alpha 1d	5.94	0.39	6.45	0.31	0.1818
NM_007417	Adra2a	adrenergic receptor, alpha 2a	5.95	0.38	6.12	0.4	0.54876
NM_009633	Adra2b	adrenergic receptor, alpha 2b	8.09	0.63	8.81	0.58	0.03652
NM_007418	Adra2c	adrenergic receptor, alpha 2c	8.02	0.53	8.26	0.43	0.53429
NM_007419	Adrb1	adrenergic receptor, beta 1	6.48	0.45	7.02	0.43	0.34887
NM_007420	Adrb2	adrenergic receptor, beta 2	5.54	0.8	5.84	0.72	0.44498
NM_013462	Adrb3	adrenergic receptor, beta 3	4.02	0.81	4.07	0.88	0.9195
NM_177322	Agtr1a	angiotensin II receptor, type 1a	9.65	0.26	9.74	0.24	0.51518
NM_175086	Agtr1b	angiotensin II receptor, type 1b	5.32	0.32	5.74	0.3	0.05626
NM_011784	Aplnr	apelin receptor	4.98	1	5.61	0.31	0.19545
NM_016847	Avpr1a	arginine vasopressin receptor 1A	7.3	0.61	6.76	0.42	0.05483
NM_019404	Avpr2	arginine vasopressin receptor 2	3.37	0.49	4.03	0.64	0.40725
NM_009766	Brs3	bombesin-like receptor 3	6.09	0.47	6.02	0.46	0.83354
NM_007539	Bdkrb1	bradykinin receptor, beta 1	4.99	0.5	5.1	0.58	0.8281
NM_009747	Bdkrb2	bradykinin receptor, beta 2	5.59	0.59	5.83	0.48	0.41334
NM_007726	Cnr1	cannabinoid receptor 1 (brain)	7.86	0.47	7.59	0.44	0.30064
NM_009924	Cnr2	cannabinoid receptor 2 (macrophage)	4.53	0.39	4.46	0.33	0.8014
NM_011798	Xcr1	chemokine (C motif) receptor 1	5.38	0.2	5.46	0.58	0.81747
NM_009912	Ccr1	chemokine (C-C motif) receptor 1	3.69	0.86	2.87	0.84	0.12177
NM_007721	Ccr10	chemokine (C-C motif) receptor 10	4.16	1.08	4.48	1.1	0.65062
NM_009915	Ccr2	chemokine (C-C motif) receptor 2	4.86	0.42	5.48	0.38	0.01481
NM_009914	Ccr3	chemokine (C-C motif) receptor 3	2.85	0.8	3.43	0.83	0.47266
NM_009916	Ccr4	chemokine (C-C motif) receptor 4	0.42	1.66	1.81	1.51	0.1136
NM_009917	Ccr5	chemokine (C-C motif) receptor 5	6.13	0.29	6.38	0.35	0.49865
NM_009835	Ccr6	chemokine (C-C motif) receptor 6	4.71	0.44	5.02	0.46	0.2503
NM_007719	Ccr7	chemokine (C-C motif) receptor 7	4.75	0.41	5.2	0.42	0.39125
NM_001166625	Ccr9	chemokine (C-C motif) receptor 9	5.61	0.11	5.44	0.14	0.14825
NM_145700	Ccrl1	chemokine (C-C motif) receptor-like 1	5.49	0.36	5.6	0.37	0.67156
NM_017466	Ccrl2	chemokine (C-C motif) receptor-like 2	5.43	0.52	5.19	0.68	0.51424
NM_009987	Cx3cr1	chemokine (C-X3-C) receptor 1	5.26	0.74	5.27	0.76	0.98819
NM_178241	Cxcr1	chemokine (C-X-C motif) receptor 1	5.9	0.88	5.4	0.71	0.23663
NM_009909	Cxcr2	chemokine (C-X-C motif) receptor 2	6.17	0.51	5.91	0.38	0.28316
NM_009910	Cxcr3	chemokine (C-X-C motif) receptor 3	4.19	0.86	3.81	0.86	0.37835
NM_009911	Cxcr4	chemokine (C-X-C motif) receptor 4	5.26	0.3	5.38	0.32	0.49019
NM_030712	Cxcr6	chemokine (C-X-C motif) receptor 6	4.62	0.29	4.37	0.29	0.36634
NM_007722	Cxcr7	chemokine (C-X-C motif) receptor 7	5.11	0.22	5.54	0.21	0.24448
NM_008153	Cmklr1	chemokine-like receptor 1	6.52	0.26	6.59	0.27	0.65239
NM_009827	Cckar	cholecystokinin A receptor	5.15	0.53	5.99	0.25	0.029
NM_007627	Cckbr	cholecystokinin B receptor	5.27	0.59	5.76	0.48	0.20122
NM_001112697	Chrm1	cholinergic receptor, muscarinic 1, CNS	5.28	0.32	5.79	0.32	0.24786
NM_203491	Chrm2	cholinergic receptor, muscarinic 2, cardiac	3	1.34	3.02	1.49	0.98491
NM_033269	Chrm3	cholinergic receptor, muscarinic 3, cardiac	5.55	0.62	6.44	0.54	0.01491
NM_007699	Chrm4	cholinergic receptor, muscarinic 4	4.07	1.03	4.1	0.96	0.95456
NM_205783	Chrm5	cholinergic receptor, muscarinic 5	4.6	0.43	4.65	0.42	0.92204
NM_007389	Chrna1	cholinergic receptor, nicotinic, alpha polypeptide 1 (muscle)	4.76	0.6	5.1	0.51	0.31847
NM_144803	Chrna2	cholinergic receptor, nicotinic, alpha polypeptide 2 (neuronal)	6.61	0.62	6.89	0.62	0.54576
NM_145129	Chrna3	cholinergic receptor, nicotinic, alpha polypeptide 3	6.22	0.42	6.35	0.39	0.54345
NM_015730	Chrna4	cholinergic receptor, nicotinic, alpha polypeptide 4	5.45	0.46	5.47	0.41	0.95686
NM_176844	Chrna5	cholinergic receptor, nicotinic, alpha polypeptide 5	4.74	0.61	5	0.49	0.45891
NM_021369	Chrna6	cholinergic receptor, nicotinic, alpha polypeptide 6	3.66	1.48	2.93	1.41	0.33627
NM_007390	Chrna7	cholinergic receptor, nicotinic, alpha polypeptide 7	8.97	0.24	9.15	0.32	0.32351
NM_009601	Chrnb1	cholinergic receptor, nicotinic, beta polypeptide 1 (muscle)	7.25	0.35	7.2	0.35	0.86077
NM_009602	Chrnb2	cholinergic receptor, nicotinic, beta polypeptide 2 (neuronal)	4.42	0.6	5.27	0.44	0.21835
NM_173212	Chrnb3	cholinergic receptor, nicotinic, beta polypeptide 3	4.23	0.5	4.4	0.5	0.53936
NM_148944	Chrnb4	cholinergic receptor, nicotinic, beta polypeptide 4	6.09	0.22	6.4	0.21	0.15197
NM_021600	Chrnd	cholinergic receptor, nicotinic, delta polypeptide	5.86	0.52	6.3	0.62	0.30291
NM_009603	Chrne	cholinergic receptor, nicotinic, epsilon polypeptide	5.18	0.26	5.22	0.39	0.90632
NM_009604	Chrng	cholinergic receptor, nicotinic, gamma polypeptide	5.79	0.55	6.04	0.54	0.45388
NM_010169	F2r	coagulation factor II (thrombin) receptor	9.13	0.78	9.12	0.79	0.97725
NM_007974	F2rl1	coagulation factor II (thrombin) receptor-like 1	3.73	0.55	4.71	0.38	0.05457
NM_010170	F2rl2	coagulation factor II (thrombin) receptor-like 2	4.81	0.26	5.09	0.25	0.196
NM_007975	F2rl3	coagulation factor II (thrombin) receptor-like 3	5.77	0.46	5.81	0.46	0.90587
NM_009779	C3ar1	complement component 3a receptor 1	6.59	0.49	7.06	0.52	0.10524
NM_021476	Cysltr1	cysteinyl leukotriene receptor 1	4.78	0.56	5.25	0.73	0.25262
NM_133720	Cysltr2	cysteinyl leukotriene receptor 2	4.5	1.06	3.94	1.06	0.28245
NM_010076	Drd1a	dopamine receptor D1A	4.43	0.4	3.95	0.47	0.17215
NM_010077	Drd2	dopamine receptor D2	8.71	0.32	8.86	0.27	0.38864
NM_007877	Drd3	dopamine receptor D3	5.25	0.77	6.06	0.57	0.09265
NM_007878	Drd4	dopamine receptor D4	8.21	0.47	8.4	0.46	0.55598
NM_010332	Ednra	endothelin receptor type A	7.31	0.53	7.82	0.54	0.08885
NM_007904	Ednrb	endothelin receptor type B	7.72	0.38	8.29	0.43	0.04531
NM_013523	Fshr	follicle stimulating hormone receptor	5.06	0.66	5.41	0.5	0.32926
NM_013521	Fpr1	formyl peptide receptor 1	6.7	0.23	6.88	0.32	0.51783
NM_008039	Fpr2	formyl peptide receptor 2	4.87	0.31	5.04	0.52	0.61891
NM_194057	Ffar1	free fatty acid receptor 1	3.57	0.89	3.78	0.94	0.66838
NM_146187	Ffar2	free fatty acid receptor 2	6.27	0.36	6.52	0.36	0.27399
NM_174985	Gpbar1	G protein-coupled bile acid receptor 1	5.49	0.63	5.11	0.55	0.40075
NM_146250	Gpr1	G protein-coupled receptor 1	4.51	0.13	4.63	0.13	0.54999
NM_178760	Gpr107	G protein-coupled receptor 107	7.34	0.52	7.54	0.54	0.62716
NM_030084	Gpr108	G protein-coupled receptor 108	8.36	0.39	8.12	0.38	0.39528
NM_133776	Gpr110	G protein-coupled receptor 110	7.71	1.96	3.83	0.95	1e-05
NM_001014394	Gpr113	G protein-coupled receptor 113	6.84	0.31	7.36	0.38	0.04368
NM_030067	Gpr115	G protein-coupled receptor 115	4.6	0.3	4.79	0.29	0.67355
NM_181748	Gpr120	G protein-coupled receptor 120	5.58	0.38	5.77	0.38	0.6468
NM_177469	Gpr123	G protein-coupled receptor 123	8.27	0.35	8.33	0.34	0.84204
NM_054044	Gpr124	G protein-coupled receptor 124	5.04	1.4	5.49	1.38	0.53999
NM_001002268	Gpr126	G protein-coupled receptor 126	4.97	0.87	5.2	0.94	0.63814
NM_172825	Gpr128	G protein-coupled receptor 128	5.7	0.58	5.54	0.59	0.7376
NM_019925	Gpr132	G protein-coupled receptor 132	4.76	0.36	4.8	0.39	0.88371
NM_181752	Gpr135	G protein-coupled receptor 135	6	0.23	6.25	0.21	0.07325
NM_207220	Gpr137	G protein-coupled receptor 137	6.71	0.55	6.82	0.55	0.77283
NR_003568	Gpr137b-ps	G protein-coupled receptor 137B, pseudogene	6.07	0.48	6.55	0.55	0.20238
NM_027518	Gpr137c	G protein-coupled receptor 137C	7.3	0.53	7.51	0.51	0.42757
NM_181754	Gpr141	G protein-coupled receptor 141	3.35	1.47	2.73	1.36	0.38175
NM_181749	Gpr142	G protein-coupled receptor 142	4.28	0.54	4.23	0.57	0.92814
NM_010951	Gpr143	G protein-coupled receptor 143	7.46	0.55	7.76	0.48	0.24913
NM_001038703	Gpr146	G protein-coupled receptor 146	9.92	0.35	9.62	0.32	0.1074
NM_177346	Gpr149	G protein-coupled receptor 149	2.46	1.77	3.15	1.42	0.4617
NM_175495	Gpr150	G protein-coupled receptor 150	3.6	1.77	4.59	0.5	0.23267
NM_181543	Gpr151	G protein-coupled receptor 151	6.17	0.33	6.45	0.42	0.38221
NM_206973	Gpr152	G protein-coupled receptor 152	5.48	0.55	5.14	0.43	0.24115
NM_178406	Gpr153	G protein-coupled receptor 153	7.72	0.36	7.88	0.33	0.54607
NM_153394	Gpr156	G protein-coupled receptor 156	6	0.43	6.24	0.42	0.40792
NM_177366	Gpr157	G protein-coupled receptor 157	7.22	0.2	7.47	0.21	0.15631
NM_001004761	Gpr158	G protein-coupled receptor 158	5.97	0.45	6.21	0.45	0.3898
NM_013533	Gpr162	G protein-coupled receptor 162	4.12	1.3	4.31	1.29	0.79321
NM_001025381	Gpr17	G protein-coupled receptor 17	5.71	0.39	5.7	0.37	0.97438
NM_173398	Gpr171	G protein-coupled receptor 171	3.74	1.83	3.7	1.69	0.95894
NM_029643	Gpr172b	G protein-coupled receptor 172B	6.6	0.61	6.53	0.63	0.87711
NM_201367	Gpr176	G protein-coupled receptor 176	4.09	0.62	4.63	0.61	0.23916
NM_182806	Gpr18	G protein-coupled receptor 18	3.55	1.46	3.27	1.48	0.69476
NM_021434	Gpr180	G protein-coupled receptor 180	8.69	0.32	8.64	0.31	0.79329
NM_007412	Gpr182	G protein-coupled receptor 182	8.48	0.41	8.7	0.41	0.31468
NM_183031	Gpr183	G protein-coupled receptor 183	6.61	0.37	6.46	0.32	0.56357
NM_001167693	Gpr19	G protein-coupled receptor 19	5.28	0.6	5.53	0.58	0.60395
NM_173365	Gpr20	G protein-coupled receptor 20	5.38	0.48	5.47	0.44	0.74193
NM_177383	Gpr21	G protein-coupled receptor 21	3.29	1	3.68	1.05	0.59572
NM_175191	Gpr22	G protein-coupled receptor 22	4.87	0.4	4.55	0.33	0.14974
NM_173410	Gpr26	G protein-coupled receptor 26	7.08	0.28	7.07	0.28	0.94997
NM_008158	Gpr27	G protein-coupled receptor 27	6.94	0.37	6.96	0.34	0.92842
NM_029771	Gpr30	G protein-coupled receptor 30	5.81	0.4	5.95	0.27	0.60764
NM_008159	Gpr33	G protein-coupled receptor 33	4.37	0.24	4.15	0.22	0.15585
NM_011823	Gpr34	G protein-coupled receptor 34	3.41	0.79	3.48	0.75	0.86326
NM_022320	Gpr35	G protein-coupled receptor 35	5.49	0.4	5.94	0.42	0.17594
NM_010338	Gpr37	G protein-coupled receptor 37	5.57	0.4	5.97	0.36	0.25086
NM_134438	Gpr37l1	G protein-coupled receptor 37-like 1	5.08	0.44	5.51	0.46	0.23055
NM_027677	Gpr39	G protein-coupled receptor 39	6.73	0.59	6.76	0.59	0.9425
NM_175668	Gpr4	G protein-coupled receptor 4	4.67	0.45	4.9	0.41	0.42856
NM_009962	Gpr44	G protein-coupled receptor 44	5.87	0.36	6.12	0.27	0.45746
NM_053107	Gpr45	G protein-coupled receptor 45	4.35	0.65	4.51	0.68	0.75453
NM_018882	Gpr56	G protein-coupled receptor 56	6.58	0.32	6.78	0.32	0.60614
NM_199058	Gpr6	G protein-coupled receptor 6	4.25	0.81	4.21	0.84	0.92822
NM_175470	Gpr61	G protein-coupled receptor 61	5.61	0.37	5.77	0.41	0.60697
NM_030733	Gpr63	G protein-coupled receptor 63	4.55	0.35	4.59	0.34	0.91106
NM_178712	Gpr64	G protein-coupled receptor 64	4.3	1.2	5.69	1.16	0.08922
NM_175493	Gpr68	G protein-coupled receptor 68	6.16	0.34	6.16	0.34	0.99817
NM_175490	Gpr75	G protein-coupled receptor 75	5.49	0.36	5.51	0.41	0.94538
NM_176912	Gpr77	G protein-coupled receptor 77	5.67	0.35	6.11	0.36	0.08388
NM_175520	Gpr81	G protein-coupled receptor 81	4.93	0.49	5.53	0.28	0.16911
NM_175669	Gpr82	G protein-coupled receptor 82	3.63	0.44	3.45	0.39	0.6691
NM_010287	Gpr83	G protein-coupled receptor 83	4.2	0.34	4.88	0.42	0.05833
NM_030720	Gpr84	G protein-coupled receptor 84	3.52	0.29	4.6	0.33	0.16888
NM_145066	Gpr85	G protein-coupled receptor 85	7.46	0.4	7.63	0.39	0.57426
NM_032399	Gpr87	G protein-coupled receptor 87	5.91	0.82	5.85	0.81	0.91283
NM_026229	Gpr89	G protein-coupled receptor 89	8.38	0.49	8.29	0.46	0.76141
NM_173036	Gpr97	G protein-coupled receptor 97	6.14	0.37	6.59	0.19	0.10953
NM_054053	Gpr98	G protein-coupled receptor 98	6.17	0.67	6.97	0.47	0.0187
NM_181444	Gprc5a	G protein-coupled receptor, family C, group 5, member A	3.95	0.73	4.03	0.71	0.88108
NM_022420	Gprc5b	G protein-coupled receptor, family C, group 5, member B	2.5	1.86	4.5	1.85	0.06886
NM_001110337	Gprc5c	G protein-coupled receptor, family C, group 5, member C	8.5	0.33	8.47	0.38	0.9023
NM_147217	Gprc5c	G protein-coupled receptor, family C, group 5, member C	7.78	0.46	7.85	0.52	0.82192
NM_053118	Gprc5d	G protein-coupled receptor, family C, group 5, member D	3.23	1.15	3.31	1.19	0.92889
NM_153071	Gprc6a	G protein-coupled receptor, family C, group 6, member A	5.06	0.75	5.78	0.48	0.14073
NM_010254	Galr2	galanin receptor 2	5.66	0.28	5.62	0.29	0.86159
NM_015738	Galr3	galanin receptor 3	5.92	0.35	6.28	0.24	0.36657
NM_008177	Grpr	gastrin releasing peptide receptor	2.85	0.56	3.89	0.6	0.12143
NM_010323	Gnrhr	gonadotropin releasing hormone receptor	4.36	0.43	4.47	0.32	0.74652
NM_177330	Ghsr	growth hormone secretagogue receptor	6.31	0.3	6.41	0.31	0.59179
NM_008285	Hrh1	histamine receptor H1	4.98	0.34	5.21	0.31	0.19105
NM_001010973	Hrh2	histamine receptor H2	4.18	0.92	2.91	0.78	0.00692
NM_133849	Hrh3	histamine receptor H3	7.97	0.44	8.14	0.38	0.46158
NM_153087	Hrh4	histamine receptor H4	4	0.48	3.77	0.47	0.41377
NM_001163027	Hcrtr1	hypocretin (orexin) receptor 1	5.15	0.63	5.79	0.47	0.16738
NM_198962	Hcrtr2	hypocretin (orexin) receptor 2	5.43	0.94	5.13	0.91	0.51489
NM_053244	Kiss1r	KISS1 receptor	6.12	0.82	6.81	0.66	0.23507
NM_010195	Lgr5	leucine rich repeat containing G protein coupled receptor 5	7.03	0.6	7.78	0.59	0.10732
NM_008519	Ltb4r1	leukotriene B4 receptor 1	5.94	0.16	5.91	0.15	0.89357
NM_020490	Ltb4r2	leukotriene B4 receptor 2	6.56	0.44	6.8	0.33	0.3161
NM_013582	Lhcgr	luteinizing hormone/choriogonadotropin receptor	5.56	0.51	5.33	0.51	0.49212
NM_010336	Lpar1	lysophosphatidic acid receptor 1	6.56	0.34	6.81	0.33	0.33956
NM_020028	Lpar2	lysophosphatidic acid receptor 2	5.55	0.35	6.11	0.2	0.12832
NM_022983	Lpar3	lysophosphatidic acid receptor 3	8.52	0.31	8.81	0.3	0.12775
NM_175271	Lpar4	lysophosphatidic acid receptor 4	4.49	0.37	4.46	0.35	0.89175
NM_175116	Lpar6	lysophosphatidic acid receptor 6	8.99	0.31	9.36	0.32	0.17935
NM_008552	Mas1	MAS1 oncogene	4.67	0.72	5.25	0.73	0.1777
NM_203490	Mrgprd	MAS-related GPR, member D	4.74	0.48	5.3	0.29	0.10883
NM_175534	Mrgpre	MAS-related GPR, member E	6.22	0.38	6.39	0.37	0.40279
NM_145379	Mrgprf	MAS-related GPR, member F	6.13	0.99	6.46	1.02	0.60085
NM_203492	Mrgprg	MAS-related GPR, member G	5.52	0.36	5.42	0.35	0.66871
NM_207540	Mrgprx1	MAS-related GPR, member X1	3.19	0.16	2.4	0.17	0.02077
NM_145132	Mchr1	melanin-concentrating hormone receptor 1	3.26	1.32	3.01	1.41	0.75052
NM_008559	Mc1r	melanocortin 1 receptor	4.62	0.29	4.7	0.32	0.7899
NM_008560	Mc2r	melanocortin 2 receptor	4.41	0.29	4.65	0.36	0.2681
NM_008561	Mc3r	melanocortin 3 receptor	3.77	0.35	3.77	0.43	0.99588
NM_016977	Mc4r	melanocortin 4 receptor	5.09	0.58	5.17	0.51	0.82331
NM_013596	Mc5r	melanocortin 5 receptor	5.1	0.19	5.06	0.18	0.89032
NM_008639	Mtnr1a	melatonin receptor 1A	6.25	0.56	7.62	0.53	0.01514
NM_145712	Mtnr1b	melatonin receptor 1B	4.49	1.11	3.95	1.17	0.34537
NM_008703	Nmbr	neuromedin B receptor	4.8	0.25	5.09	0.27	0.09007
NM_010341	Nmur1	neuromedin U receptor 1	4.19	0.94	3.05	1.05	0.06309
NM_153079	Nmur2	neuromedin U receptor 2	4.51	0.55	4.35	0.59	0.65706
NM_133192	Npffr2	neuropeptide FF receptor 2	5.76	0.36	5.46	0.4	0.33905
NM_175678	Npsr1	neuropeptide S receptor 1	5.25	0.53	5.7	0.52	0.31063
NM_010934	Npy1r	neuropeptide Y receptor Y1	4	0.54	4.57	0.5	0.05136
NM_008731	Npy2r	neuropeptide Y receptor Y2	3.85	0.73	4.41	0.75	0.53172
NM_016708	Npy5r	neuropeptide Y receptor Y5	4.6	0.41	4.34	0.29	0.30368
NM_010935	Npy6r	neuropeptide Y receptor Y6	3.02	0.43	3.47	0.34	0.22168
NM_018766	Ntsr1	neurotensin receptor 1	6.92	0.51	7.03	0.5	0.79865
NM_008747	Ntsr2	neurotensin receptor 2	8.69	0.25	8.95	0.27	0.30427
NM_013622	Oprd1	opioid receptor, delta 1	6.91	0.43	7.03	0.38	0.67278
NM_011011	Oprk1	opioid receptor, kappa 1	3.78	0.57	3.79	0.54	0.97964
NM_001039652	Oprm1	opioid receptor, mu 1	5.98	0.47	6.13	0.46	0.67908
NM_011012	Oprl1	opioid receptor-like 1	5	0.19	5.31	0.18	0.20871
NM_008106	Opn1mw	opsin 1 (cone pigments), medium-wave-sensitive (color blindness, deutan)	3.76	0.9	3.93	0.95	0.84814
NM_007538	Opn1sw	opsin 1 (cone pigments), short-wave-sensitive (color blindness, tritan)	5.52	0.57	5.65	0.59	0.73438
NM_010098	Opn3	opsin 3	5.89	0.4	5.16	0.26	0.00411
NM_001128599	Opn4	opsin 4 (melanopsin)	6.81	0.41	7.19	0.34	0.24053
NM_181753	Opn5	opsin 5	4.88	0.45	5.34	0.44	0.14551
NM_001001490	Oxgr1	oxoglutarate (alpha-ketoglutarate) receptor 1	3.32	0.35	3.51	0.38	0.59082
NM_001081147	Oxtr	oxytocin receptor	4.99	0.87	5.26	0.58	0.54141
NM_021381	Prokr1	prokineticin receptor 1	3.67	0.48	4.18	0.43	0.50837
NM_144944	Prokr2	prokineticin receptor 2	6.45	0.29	6.41	0.28	0.83847
NM_201615	Prlhr	prolactin releasing hormone receptor	3.58	0.37	3.45	0.37	0.62331
NM_008962	Ptgdr	prostaglandin D receptor	4.02	0.51	3.72	0.59	0.3416
NM_013641	Ptger1	prostaglandin E receptor 1 (subtype EP1)	4.66	0.56	4.5	0.47	0.6353
NM_008964	Ptger2	prostaglandin E receptor 2 (subtype EP2)	4.65	0.26	5.29	0.16	0.03072
NM_011196	Ptger3	prostaglandin E receptor 3 (subtype EP3)	3.92	0.42	4.95	0.37	0.23612
NM_001136079	Ptger4	prostaglandin E receptor 4 (subtype EP4)	4.74	0.3	5.22	0.29	0.22462
NM_008966	Ptgfr	prostaglandin F receptor	3.87	0.55	4.76	0.39	0.03679
NM_008967	Ptgir	prostaglandin I receptor (IP)	5.29	0.52	5.24	0.51	0.86514
NM_008772	P2ry1	purinergic receptor P2Y, G-protein coupled 1	8.36	0.43	8.83	0.33	0.10199
NM_172435	P2ry10	purinergic receptor P2Y, G-protein coupled 10	2.57	0.85	3.44	0.83	0.15845
NM_027571	P2ry12	purinergic receptor P2Y, G-protein coupled 12	6.34	0.18	6.59	0.28	0.34222
NM_028808	P2ry13	purinergic receptor P2Y, G-protein coupled 13	6.68	0.21	6.74	0.29	0.71166
NM_008773	P2ry2	purinergic receptor P2Y, G-protein coupled 2	8.83	0.59	8.79	0.62	0.91505
NM_133200	P2ry14	purinergic receptor P2Y, G-protein coupled, 14	6.01	0.56	6.68	0.68	0.10995
NM_198192	Qrfpr	pyroglutamylated RFamide peptide receptor	6.62	0.37	6.14	0.3	0.00943
NM_178717	Rxfp3	relaxin family peptide receptor 3	4.08	1.52	3.16	1.68	0.27344
NM_181817	Rxfp4	relaxin family peptide receptor 4	3.54	0.9	4.81	0.5	0.01682
NM_212452	Rxfp1	relaxin/insulin-like family peptide receptor 1	5.26	0.49	5.38	0.51	0.76588
NM_080468	Rxfp2	relaxin/insulin-like family peptide receptor 2	5.73	0.47	5.2	0.38	0.05139
NM_009216	Sstr1	somatostatin receptor 1	7.41	0.39	7.6	0.32	0.54433
NM_009218	Sstr3	somatostatin receptor 3	6.56	0.11	6.56	0.12	0.99291
NM_009219	Sstr4	somatostatin receptor 4	7.12	0.32	7.06	0.34	0.76321
NM_007901	S1pr1	sphingosine-1-phosphate receptor 1	8.84	0.34	9.4	0.33	0.05902
NM_010333	S1pr2	sphingosine-1-phosphate receptor 2	5.59	0.63	5.81	0.62	0.60675
NM_010101	S1pr3	sphingosine-1-phosphate receptor 3	6.02	0.44	6.31	0.49	0.41398
NM_010102	S1pr4	sphingosine-1-phosphate receptor 4	4.57	0.65	4.28	0.7	0.44313
NM_053190	S1pr5	sphingosine-1-phosphate receptor 5	6.7	0.31	6.82	0.49	0.7233
NM_032400	Sucnr1	succinate receptor 1	8.82	0.25	9.39	0.29	0.09572
NM_009313	Tacr1	tachykinin receptor 1	4.95	0.51	5.81	0.26	0.15301
NM_009314	Tacr2	tachykinin receptor 2	5.59	0.68	5.74	0.66	0.77054
NM_021382	Tacr3	tachykinin receptor 3	4.82	0.24	5.49	0.23	0.26982
NM_009325	Tbxa2r	thromboxane A2 receptor	4.57	0.8	5.83	0.6	0.23528
NM_011648	Tshr	thyroid stimulating hormone receptor	5.12	0.44	5.44	0.47	0.23447
NM_013696	Trhr	thyrotropin releasing hormone receptor	4.94	0.46	4.66	0.38	0.32957
NM_133202	Trhr2	thyrotropin releasing hormone receptor 2	5.39	0.53	5.39	0.52	0.99232
NM_053205	Taar1	trace amine-associated receptor 1	4.86	0.25	5.15	0.25	0.23825
NM_001007266	Taar2	trace amine-associated receptor 2	1.76	0.85	2.3	0.88	0.36888
NM_001008429	Taar3	trace amine-associated receptor 3	3.39	0.65	3.37	0.64	0.96888
NM_001008499	Taar4	trace amine-associated receptor 4	4.17	0.38	4.49	0.37	0.3187
NM_001009574	Taar5	trace amine-associated receptor 5	5.19	0.21	5.47	0.07	0.12264
NM_001010828	Taar6	trace amine-associated receptor 6	7.27	0.38	7.37	0.37	0.69455
NM_001010829	Taar7a	trace amine-associated receptor 7A	0.71	0.94	1.03	1	0.56784
NM_001010827 // NM_001010827	Taar7b // Taar7b	trace amine-associated receptor 7B // trace amine-associated receptor 7B	5.6	0.63	6.36	0.62	0.19868
NM_001010838	Taar7d	trace amine-associated receptor 7D	2.06	1.01	2.52	0.85	0.52164
NM_001010835	Taar7e	trace amine-associated receptor 7E	1.43	1.4	1.24	1.34	0.84692
NM_001010839	Taar7f	trace amine-associated receptor 7F	1.97	1.12	1.92	1.4	0.9446
NM_001010837	Taar8b	trace amine-associated receptor 8B	0.42	0.68	1.16	0.62	0.10033
NM_001010831	Taar9	trace amine-associated receptor 9	4.58	0.23	4.7	0.22	0.46412
NM_145440	Uts2r	urotensin 2 receptor	6.85	0.56	6.9	0.56	0.90845
