# Supplementary material for: Amelioration of non-alcoholic fatty liver disease by targeting adhesion G protein-coupled receptor F1 (Adgrf1)
Source: eLife journal article supplement (doi:10.7554/elife.85131), 2023-08-02
Supplement: supp4 [file Supplementary File 4-Source 1.xlsx]

## Sheet: Sheet1
Gene Accession	Gene Symbol	Gene Description	STC		HFD		p value
			average	SD	average	SD
NM_009127	SCD1	stearoyl-Coenzyme A desaturase 1	12.61	0.64	13.36	0.22	0.02
NM_007988	FASN	fatty acid synthase	9.22	0.43	10.04	1.81	0.05
NM_133904	Acacb	acetyl-Coenzyme A carboxylase beta	8.62	0.91	8.99	0.98	0.41
NM_011480	Srebf1	sterol regulatory element binding transcription factor 1	9.07	0.59	10.21	0.59	0
NM_011144	Ppara	peroxisome proliferator activated receptor alpha	11.23	0.53	11.48	0.82	0.21
NM_001127330	Pparg	peroxisome proliferator activated receptor gamma	7.49	0.31	8.88	1.63	0.01
NM_011145	Ppard	peroxisome proliferator activator receptor delta	6.31	0.89	6.68	1.29	0.28
NM_009480	Usf1	upstream transcription factor 1	7.02	0.59	6.74	0.31	0.33
NM_134037	Acly	ATP citrate lyase	10.44	0.43	10.54	0.49	0.71
NM_183220	Accs	1-aminocyclopropane-1-carboxylate synthase homolog (Arabidopsis)(non-functional)	3.68	1.84	5.14	0.67	0.1
NM_010411	Hdac3	histone deacetylase 3	9.75	0.29	10.19	0.17	0.01
NM_011308	Ncor1	nuclear receptor co-repressor 1	9.24	0.79	9.7	0.79	0.34
NM_011424	Ncor2	nuclear receptor co-repressor 2	6.78	0.89	7.28	0.93	0.36
NM_024124	Hdac9	histone deacetylase 9	6.87	0.54	7.55	0.74	0.1
NM_011680	Usf2	upstream transcription factor 2	9.44	0.43	9.52	0.29	0.72
NM_009480	Usf1	upstream transcription factor 1	7.02	0.59	6.74	0.31	0.33
NM_020009	Mtor	mechanistic target of rapamycin (serine/threonine kinase)	8.18	0.72	8.55	0.74	0.41
NM_009652	Akt1	thymoma viral proto-oncogene 1	9.24	0.48	9.26	0.55	0.95
NM_011785	Akt3	thymoma viral proto-oncogene 3	7.1	0.57	7.76	0.51	0.06
NM_011647	Tsc2	tuberous sclerosis 2	7.91	0.74	8.5	0.83	0.23
NM_022887	Tsc1	tuberous sclerosis 1	6.98	0.81	7.23	0.89	0.62
NM_019825	Ncoa6	nuclear receptor coactivator 6	7.26	1.3	7.8	1.38	0.5
NM_011305	Rxra	retinoid X receptor alpha	10.39	0.81	10.99	0.74	0.21
NM_011306	Rxrb	retinoid X receptor beta	7.18	0.49	7.07	0.42	0.68
NM_009107	Rxrg	retinoid X receptor gamma	7.83	0.27	8.45	0.41	0.01
