# Supplementary material for: Amelioration of non-alcoholic fatty liver disease by targeting adhesion G protein-coupled receptor F1 (Adgrf1)
Source: eLife journal article supplement (doi:10.7554/elife.85131), 2023-08-02
Supplement: supp5 [file Supplementary File 5-Source 1.xlsx]

## Sheet: Sheet1
raw data
NAFLD stage	mild	mild	mild	moderate	moderate	moderate	severe	severe	severe
Age	47	65	35	57	56	29	29	28	20
gender	F	F	M	M	M	M	F	F	M
BW	75	50	75	76	47.7	74	89	75	73
BH	1.65	1.46	1.7	1.7	1.6	1.8	1.62	1.72	1.71								±
BMI (kg/m2)	27.5482	23.4566	25.9516	26.2976	18.6328	22.8395	33.9125	25.3515	24.9649
Fasting Glucose (mmol/L)	5.02	5.44	4.75	6.02	8	5.25	5.6	6.52	4.42
SBP (mmHg)	125	132	110	141	88	114	131	130	131
DPB (mmHg)	75	94	60	92	58	76	86	80	116
Total Cholesterol (mmol/L)	5.03	4.55	3.29	3.85	2.81	3.29	4.14	4.66	2.99
Triglycerides (mmol/L)	1.25	0.84	1.78	1.37	0.97	3.64	0.99	0.91	1.28
HDL (mmol/L)	1.48	1.55	1.12	1.11	0.73	0.63	1.1	1.13	0.93
LDL (mmol/L)	2.95	2.6	1.63	2.06	1.73	1.68	2.67	3.34	1.53
ALT (U/L)	33	14	68	45	89	128	84	58	132
AST (U/L)	24	14	11	46	62	30	41	45	68
AST/ALT	0.7	1	0.2	1	0.7	0.2	0.5	0.8	0.5
γGGT (U/L)	23	24	306	43	45	55	56	100	146
ttest
	mild+moderate	mild+severe	moderate+severe
Age	0.901569	0.0636967	0.0870473
BW	0.953489	0.273948	0.276894
BH	0.358018	0.372405	0.812839
BMI (kg/m2)	0.290426	0.484936	0.208841
Fasting Glucose (mmol/L)	0.183811	0.526646	0.422699
SBP (mmHg)	0.655416	0.268953	0.345996
DPB (mmHg)	0.946103	0.300204	0.277069
Total Cholesterol (mmol/L)	0.179842	0.641524	0.348234
Triglycerides (mmol/L)	0.466456	0.478298	0.328275
HDL (mmol/L)	0.0472857	0.0882091	0.221376
LDL (mmol/L)	0.239109	0.864479	0.271669
ALT (U/L)	0.163189	0.119436	0.907472
AST (U/L)	0.0417531	0.0196167	0.691456
AST/ALT	1	0.901872	0.901872
γGGT (U/L)	0.498867	0.870297	0.113588
